# Supplementary material for: Copper-catalyzed synthesis of sulfonamides from nitroarenes via the insertion of sulfur dioxide
Source: Royal Society of Chemistry journal article supplement (doi:10.1039/d0cc00721h), 2020-01-01

## Copper-catalyzed synthesis of sulfonamides from nitroarenes with the insertion of sulfur dioxide

Xuefeng Wang, Min Yang, Yunyan Kuang, Jin-Biao Liu, Xiaona Fan,\* and Jie Wu\*

### *Supporting Information*

1. General experimental methods (S2).
2. Optimization of “standard conditions” (S2–S5)
3. General experimental procedure (S6–S9).
  - 3.1 Procedure of copper-catalyzed reaction (S6)
  - 3.2 Procedure of the gram-scale synthesis (S6)
  - 3.3 Procedure of the detection of sulfuric species (S7)
  - 3.4 Procedure of control experiments (S8 – S9)
4. Characterization data (S10 – S30).
5.  $^1\text{H}$ ,  $^{13}\text{C}$  and  $^{19}\text{F}$  NMR spectra of compounds **3** and **4** (S31 – S64).

## 1. General experimental methods:

Unless otherwise stated, all commercial reagents were used as received.  $\text{Cu}(\text{MeCN})_4\text{PF}_6$ , 1,10-phenanthroline, *N*-methyl-2-pyrrolidinone (NMP, 99.5%, Extra Dry, with molecular sieves,  $\text{Water} \leq 50$  ppm) and isopropanol (99.5%, Extra Dry, with molecular sieves,  $\text{Water} \leq 50$  ppm) were purchased from *Energy Chemicals* and used as received. Cilnidipine, Flutamide, arylboronic acids and most of nitro compounds were purchased from *Bidepharm* and used as received. Flash column chromatography was performed using silica gel (300-400 mesh, standard grade). Analytical thin-layer chromatography was performed using glass plates pre-coated with 0.25 mm 230-400 mesh silica gel impregnated with a fluorescent indicator (254 nm). Thin layer chromatography plates were visualized by exposure to 254 nm ultraviolet light or iodine stain. Organic solutions were concentrated on rotary evaporators at  $\sim 20$  Torr at 30-50°C. Nuclear magnetic resonance (NMR) spectra are recorded in parts per million (ppm) from solvent residual peak on the  $\delta$  scale.  $^1\text{H}$ ,  $^{13}\text{C}$  and  $^{19}\text{F}$  NMR spectra were recorded in chloroform-*d* or acetone-*d*<sub>6</sub> on a Bruker DRX-400 spectrometer operating at 400 MHz, 101 MHz and 376 MHz, respectively. All chemical shift values are quoted in ppm and coupling constants quoted in Hz. Melting points are tested automatically on a Melting Point Apparatus produced by *Shanghai JINGMI Scientific Instruments Co., Ltd.* High resolution mass spectrometry (HRMS) spectra were obtained on a Bruker McrIOTOF11 Instrument.

## 2. Optimization of “standard conditions”

Yields were determined by  $^{19}\text{F}$  NMR using 4-fluoroanisole as internal standard.

### 2.1 Solvent

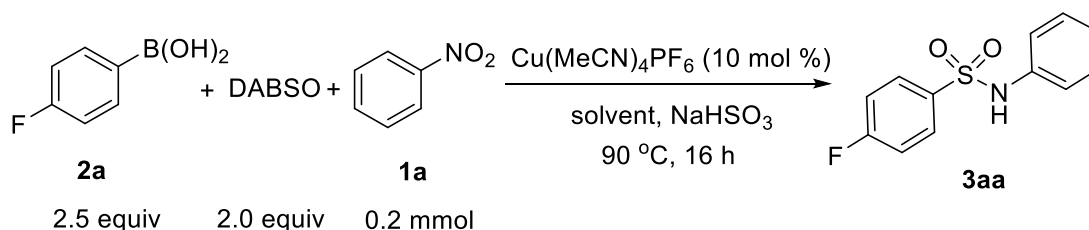

| entry | solvent | yield (%) |
|-------|---------|-----------|
| 1     | DMF     | trace     |
| 2     | NMP     | 14        |

|   |      |       |
|---|------|-------|
| 3 | DMSO | trace |
| 4 | DMAc | trace |
| 5 | HFIP | n.d.  |

## 2.2 Reductant

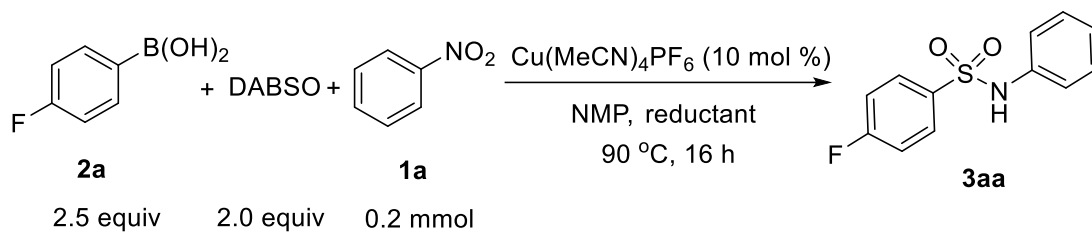

| entry | reductant (amount)                                        | yield (%) |
|-------|-----------------------------------------------------------|-----------|
| 1     | NaHSO <sub>3</sub> (2.0 equiv)                            | 13        |
| 2     | Na <sub>2</sub> SO <sub>3</sub> (2.0 equiv)               | 15        |
| 3     | Na <sub>2</sub> S <sub>2</sub> O <sub>5</sub> (2.0 equiv) | 12        |
| 4     | 1,4-Cyclohexadiene (2.0 equiv)                            | n.d.      |
| 5     | Hantzsch ester (2.0 equiv)                                | n.d.      |
| 6     | HFIP (0.2 mL)                                             | 14        |
| 7     | <i>i</i> PrOH (0.2 mL)                                    | 20        |
| 8     | none                                                      | n.d.      |

## 2.3 Cu catalyst

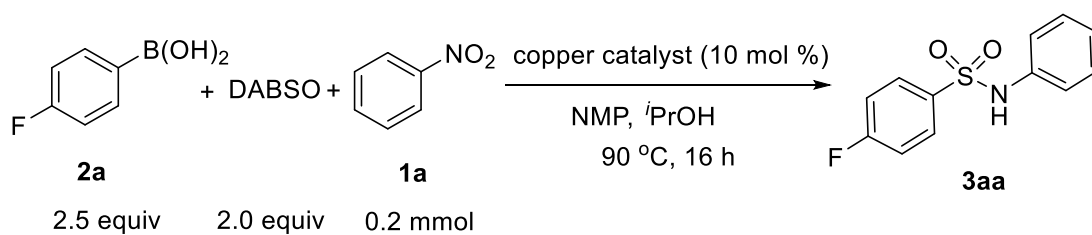

| entry | catalyst                              | yield (%) |
|-------|---------------------------------------|-----------|
| 1     | Cu(MeCN) <sub>4</sub> PF <sub>6</sub> | 18        |
| 2     | CuOAc                                 | n.d.      |
| 3     | CuI                                   | n.d.      |
| 4     | CuOTf                                 | n.d.      |
| 5     | CuCl <sub>2</sub>                     | n.d.      |

|    |                       |      |
|----|-----------------------|------|
| 6  | Cu(OTf) <sub>2</sub>  | 14   |
| 7  | Cu(acac) <sub>2</sub> | n.d. |
| 8  | FeCl <sub>2</sub>     | n.d. |
| 9  | CuSO <sub>4</sub>     | 16   |
| 10 | Cu(TFA) <sub>2</sub>  | 13   |

## 2.4 Temperature

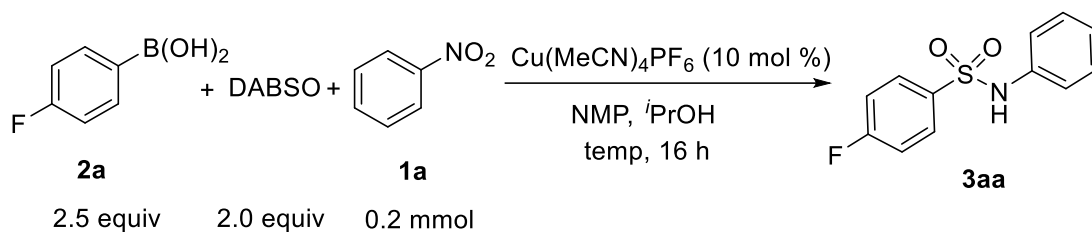

| entry | temperature (°C) | yield (%) |
|-------|------------------|-----------|
| 1     | 70               | 18        |
| 2     | 90               | 11        |
| 3     | 110              | 4         |

## 2.5 SO<sub>2</sub> sources

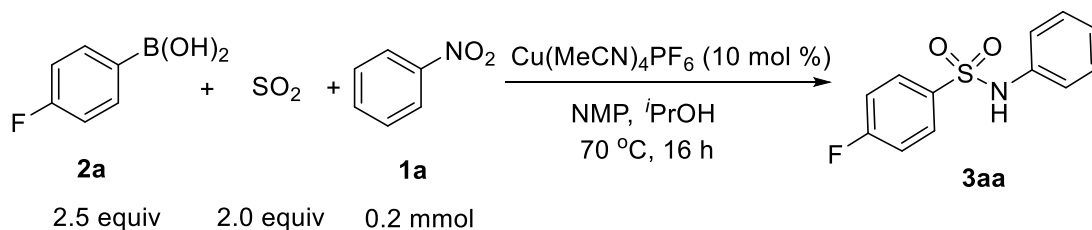

| entry | SO <sub>2</sub> source                        | yield (%) |
|-------|-----------------------------------------------|-----------|
| 1     | DABSO                                         | 18        |
| 2     | K <sub>2</sub> S <sub>2</sub> O <sub>5</sub>  | 38        |
| 3     | Na <sub>2</sub> S <sub>2</sub> O <sub>5</sub> | 29        |
| 4     | Na <sub>2</sub> S <sub>2</sub> O <sub>4</sub> | n.d.      |
| 5     | Na <sub>2</sub> SO <sub>3</sub>               | n.d.      |
| 6     | Formamidinesulfinic acid                      | n.d.      |

## 2.6 Additives

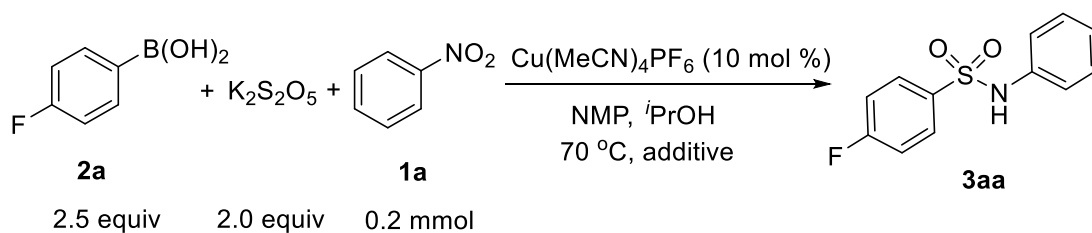

| entry | additive (equiv)           | time (h) | yield (%) |
|-------|----------------------------|----------|-----------|
| 1     | none                       | 16       | 34        |
| 2     | 1,10-phenanthroline (0.1)  | 16       | trace     |
| 3     | 1,10-phenanthroline (0.05) | 16       | 46        |
| 4     | PPh <sub>3</sub> (0.05)    | 16       | 24        |
| 5     | none                       | 48       | 70        |
| 6     | 1,10-phenanthroline (0.05) | 48       | 72        |

## 2.7 More optimizations

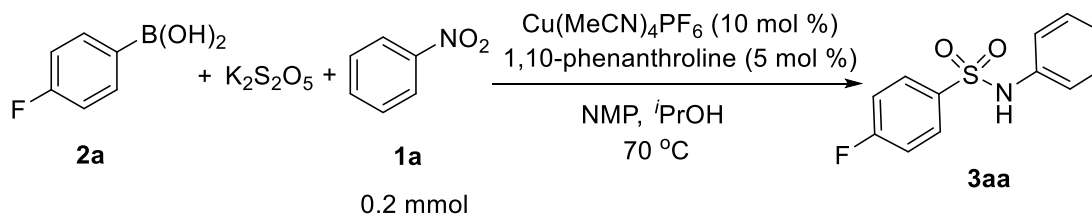

| entry | variation                                                                                                                             | yield (%) |
|-------|---------------------------------------------------------------------------------------------------------------------------------------|-----------|
| 1     | 3.0 equiv ArB(OH) <sub>2</sub> instead of 2.5 equiv                                                                                   | 77        |
| 2     | 3.0 equiv K <sub>2</sub> S <sub>2</sub> O <sub>5</sub> instead of 2.0 equiv                                                           | 78        |
| 3     | 2.0 equiv <i>i</i> PrOH instead of 0.2 mL                                                                                             | 77        |
| 3     | 20% [Cu], 10% L instead of 10% [Cu], 5% L                                                                                             | 83        |
| 4     | 20% [Cu], 10% L, 2.0 equiv <i>i</i> PrOH<br>3.0 equiv ArB(OH) <sub>2</sub> and 3.0 equiv K <sub>2</sub> S <sub>2</sub> O <sub>5</sub> | 87        |

### 3. General experimental procedure:

#### 3.1 Procedure of copper-catalyzed coupling reaction

General experimental procedure for the reaction of benzeneboronic acid **2**,  $K_2S_2O_5$  and nitrobenzene **1**. Procedure to product **3aa** is shown below as an example.

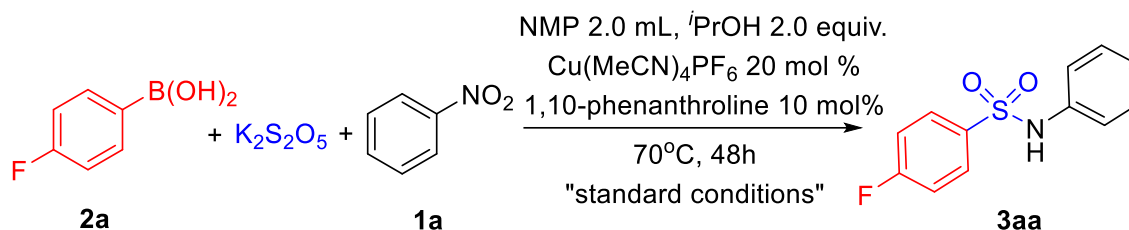

NMP (2.0 mL), isopropanol (31  $\mu$ L, 2.0 equiv) and nitrobenzene **1a** (24.6 mg, 0.2 mmol, 1.0 equiv) were added to a rubber-septa-sealed tube containing 4-fluorobenzeneboronic acid **2a** (84.0 mg, 0.6 mmol, 3.0 equiv),  $K_2S_2O_5$  (132 mg, 0.6 mmol, 3.0 equiv),  $Cu(MeCN)_4PF_6$  (14.8 mg, 0.04 mmol, 20 mol %) and 1,10-phenanthroline (3.6 mg, 0.02 mmol, 10 mol %) under Ar atmosphere via syringes. The mixture was then stirred at 70 °C for 48 h. After the scheduled time, the reaction mixture was diluted with 0.03 M HCl (60 mL) and extracted with EtOAc (20 mL  $\times$  3). The organic phases were combined and washed with brine twice before dried with anhydrous  $Na_2SO_4$ . The solvent was evaporated under reduced pressure and the residue was purified directly by flash column chromatography (Eluent: 20% EtOAc/*n*-hexane) to afford the corresponding product **3aa** (77% yield).

#### 3.2 Procedure of the gram-scale synthesis

General experimental procedure for the gram-scale synthesis of product **3i**.

Entry 1: 20 mol % Cu catalyst and 10 mol % ligand were used.

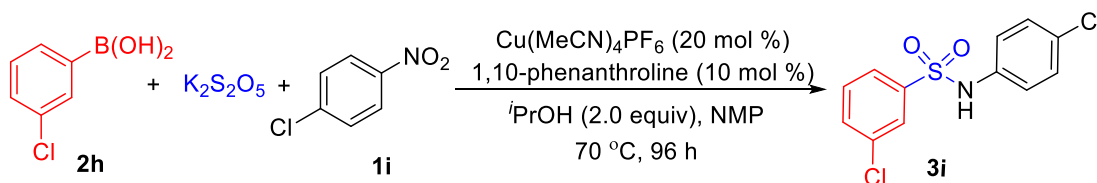

NMP (10.0 mL) and isopropanol (465  $\mu$ L, 2.0 equiv) were added to a rubber-septa-sealed 25ml round-bottom flask containing 3-chlorobenzeneboronic acid **2h** (936 mg, 6 mmol, 2.0 equiv),  $K_2S_2O_5$  (1.998 g, 9 mmol, 3.0 equiv), 1-chloro-4-nitrobenzene **1i** (471mg, 3.0 mmol, 1.0 equiv),  $Cu(MeCN)_4PF_6$  (223.8 mg, 0.6 mmol, 20 mol %) and 1,10-phenanthroline (54.0 mg, 0.3 mmol, 10 mol %) under Ar atmosphere via syringes.

The mixture was then stirred vigorously at 70 °C for 48 h. After the scheduled time, the reaction mixture was diluted with 0.03 M HCl (200 mL) and extracted with EtOAc (100 mL × 3). The organic phases were combined and washed with saturated brine twice before dried with anhydrous Na<sub>2</sub>SO<sub>4</sub>. The solvent was then evaporated under reduced pressure and the residue was purified directly by flash column chromatography (Eluent: 20% EtOAc/*n*-hexane) to afford the corresponding product **3i** (0.722 g, 80% yield).

*Entry 2: 2 mol % Cu catalyst and 1 mol % ligand were used. 1i was not consumed totally, but less byproducts were observed than entry 1.*

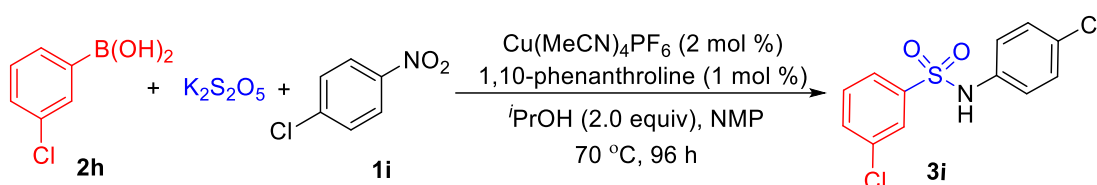

NMP (10.0 mL) and isopropanol (465 μL, 2.0 equiv) were added to a rubber-septa-sealed 25ml round-bottom flask containing 3-chlorobenzeneboronic acid **2h** (936 mg, 6 mmol, 2.0 equiv), K<sub>2</sub>S<sub>2</sub>O<sub>5</sub> (1.998 g, 9 mmol, 3.0 equiv), 1-chloro-4-nitrobenzene **1i** (471mg, 3.0 mmol), Cu(MeCN)<sub>4</sub>PF<sub>6</sub> (22.4 mg, 0.06 mmol, 2 mol %) and 1,10-phenanthroline (5.4 mg, 0.03 mmol, 1 mol %) under Ar atmosphere via syringes. The mixture was then stirred vigorously at 70 °C for 96 h. After the scheduled time, the reaction mixture was diluted with 0.03 M HCl (200 mL) and extracted with EtOAc (100 mL × 3). The organic phases were combined and washed with saturated brine twice before dried with anhydrous Na<sub>2</sub>SO<sub>4</sub>. The solvent was then evaporated under reduced pressure and the residue was purified directly by flash column chromatography (Eluent: 20% EtOAc/*n*-hexane) to afford the corresponding product **3i** (0.660 g, 73% yield).

### 3.3 Procedure of the detection of sulfuric species

A standard reaction was quenched by 30 mL of 0.1 M HCl, and the mixture was extracted by CH<sub>2</sub>Cl<sub>2</sub> (30 mL × 3). The aqueous phase was further acidized by concentrated HCl (10 mL) and refluxed under N<sub>2</sub> for 15 minutes to ensure complete decomposition of metabisulfites. After cooling down to room temperature, 0.1 M BaCl<sub>2</sub> (10 mL, 1.0 mmol) was added. The precipitates were filtered, washed by 1.0 M HCl, dried and weighed to give 17.1 mg white solid, indicating the generation of

sulfuric species ( $\text{ArSO}_3^-$ ,  $\text{HSO}_4^-$  or  $\text{SO}_4^{2-}$ ) in the reaction.

### 3.4 Procedure of control experiments

Experimental procedure for the control experiments shown in Scheme 2 is described.

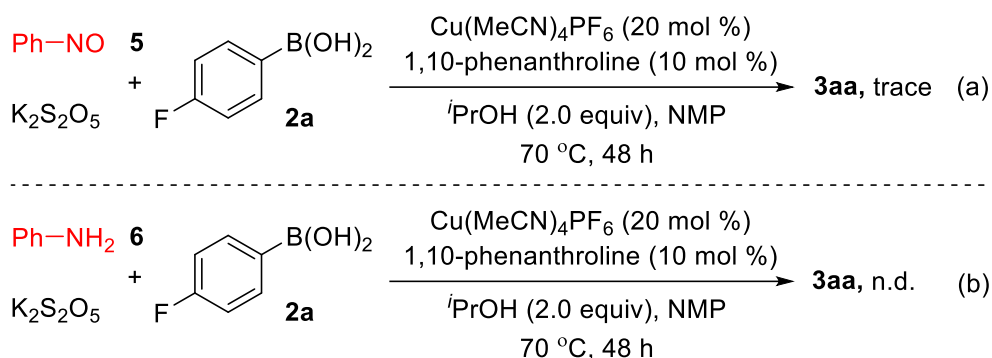

NMP (2.0 mL), isopropanol (31  $\mu\text{L}$ , 2.0 equiv) and nitrosobenzene **5** (21.4 mg, 0.2 mmol, eq a) or aniline **6** (18.6 mg, 0.2 mmol, eq. b) were added to a rubber-septa-sealed tube containing 4-fluorobenzeneboronic acid **2a** (84.0 mg, 0.6 mmol, 3.0 equiv),  $\text{K}_2\text{S}_2\text{O}_5$  (132 mg, 0.6 mmol, 3.0 equiv),  $\text{Cu}(\text{MeCN})_4\text{PF}_6$  (14.8 mg, 0.04 mmol, 20 mol %) and 1,10-phenanthroline (3.6 mg, 0.02 mmol, 10 mol %) under Ar atmosphere via syringes. The mixture was then stirred at 70  $^\circ\text{C}$  for 48 h. After the scheduled time, the reaction mixture was monitored directly by TLC.

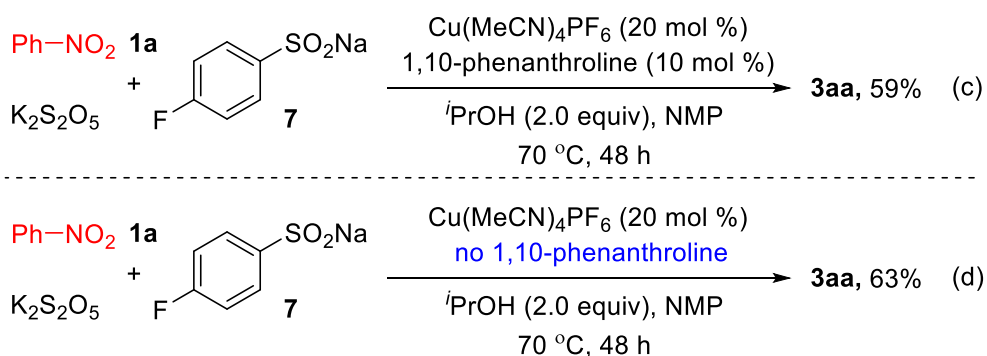

NMP (2.0 mL), isopropanol (31  $\mu\text{L}$ , 2.0 equiv) and nitrobenzene **1a** (24.6 mg, 0.2 mmol) were added to a rubber-septa-sealed tube containing sodium 4-fluorobenzenesulfonate **7** (109.2 mg, 0.6 mmol, 3.0 equiv),  $\text{K}_2\text{S}_2\text{O}_5$  (132 mg, 0.6 mmol, 3.0 equiv),  $\text{Cu}(\text{MeCN})_4\text{PF}_6$  (14.8 mg, 0.04 mmol, 20 mol %) and 1,10-phenanthroline (in eq. c, 3.6 mg, 0.02 mmol, 10 mol %, while in eq. d, no phenanthroline was added) under Ar atmosphere via syringes. The mixture was then stirred at 70  $^\circ\text{C}$  for 48 h. After



the scheduled time, the yield of product **3aa** was determined by  $^{19}\text{F}$  NMR.

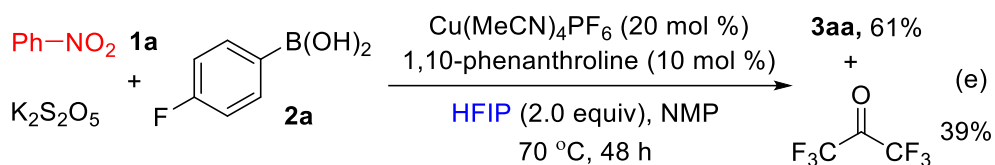

NMP (2.0 mL), HFIP (67.2 mg, 2.0 equiv) and nitrobenzene **1a** (24.6 mg, 0.2 mmol) were added to a rubber-septa-sealed tube containing 4-fluorobenzeneboronic acid **2a** (84.0 mg, 0.6 mmol, 3.0 equiv),  $\text{K}_2\text{S}_2\text{O}_5$  (132 mg, 0.6 mmol, 3.0 equiv),  $\text{Cu}(\text{MeCN})_4\text{PF}_6$  (14.8 mg, 0.04 mmol, 20 mol %) and 1,10-phenanthroline (3.6 mg, 0.02 mmol, 10 mol %) under Ar atmosphere via syringes. The mixture was then stirred at 70 °C for 48 h. After the scheduled time, the yield of product **3aa** and hexafluoropropan-2-one was determined by  $^{19}\text{F}$  NMR.

#### 4. Characterization data:

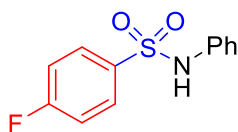

##### 4-Fluoro-*N*-phenylbenzenesulfonamide (**3aa**)<sup>1</sup>

NMP (2.0 mL), isopropanol (31  $\mu$ L, 2.0 equiv) and nitrobenzene **1a** (24.6 mg, 0.2 mmol, 1.0 equiv) were added to a rubber-septa-sealed tube containing 4-fluorobenzeneboronic acid **2a** (84.0 mg, 0.6 mmol, 3.0 equiv),  $K_2S_2O_5$  (132 mg, 0.6 mmol, 3.0 equiv),  $Cu(MeCN)_4PF_6$  (14.8 mg, 0.04 mmol, 20 mol %) and 1,10-phenanthroline (3.6 mg, 0.02 mmol, 10 mol %) under Ar atmosphere via syringes. The mixture was then stirred at 70  $^{\circ}C$  for 48 h. After the scheduled time, the reaction mixture was diluted with 0.03 M HCl (60 mL) and extracted with EtOAc (20 mL  $\times$  3). The organic phases were combined and washed with brine twice before dried with anhydrous  $Na_2SO_4$ . The solvent was evaporated under reduced pressure and the residue was purified directly by flash column chromatography (Eluent: 20% EtOAc/*n*-hexane) to afford the corresponding product **3aa**.

40.1 mg, 77% yield. White solid. M. p. 111.2 – 111.5  $^{\circ}C$ .

$^1H$  NMR (400 MHz,  $CDCl_3$ )  $\delta$  7.81 – 7.74 (m, 2H), 7.28 – 7.24 (m, 3H), 7.18 – 7.04 (m, 5H), 6.72 (s, 1H).  $^{13}C$  NMR (101 MHz,  $CDCl_3$ )  $\delta$  166.67, 136.20, 130.13 (d,  $J_F = 9.5$  Hz), 129.60, 125.99, 122.18, 116.45 (d,  $J_F = 22.8$  Hz).  $^{19}F$  NMR (376 MHz,  $CDCl_3$ )  $\delta$  -104.41.

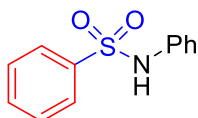

##### *N*-Phenylbenzenesulfonamide (**3ab**)<sup>1</sup>

NMP (2.0 mL), isopropanol (31  $\mu$ L, 2.0 equiv) and nitrobenzene **1a** (24.6 mg, 0.2 mmol, 1.0 equiv) were added to a rubber-septa-sealed tube containing benzeneboronic acid **2b** (73.2 mg, 0.6 mmol, 3.0 equiv),  $K_2S_2O_5$  (132 mg, 0.6 mmol, 3.0 equiv),  $Cu(MeCN)_4PF_6$  (14.8 mg, 0.04 mmol, 20 mol %) and 1,10-phenanthroline (3.6 mg, 0.02 mmol, 10 mol %) under Ar atmosphere via syringes. The mixture was then stirred at 70  $^{\circ}C$  for 48 h. After the scheduled time, the reaction mixture was diluted with 0.03 M HCl (60 mL) and extracted with EtOAc (20 mL  $\times$  3). The organic phases were combined and washed with brine twice before dried with anhydrous

Na<sub>2</sub>SO<sub>4</sub>. The solvent was then evaporated under reduced pressure and the residue was purified directly by flash column chromatography (Eluent: 20% EtOAc/*n*-hexane) to afford the corresponding product **3ab**.

33.5 mg, 72% yield. White solid. M. p. 105.5 – 107.0 °C.

<sup>1</sup>H NMR (400 MHz, CDCl<sub>3</sub>) δ 7.79 (d, *J* = 7.4 Hz, 2H), 7.53 (t, *J* = 7.3 Hz, 1H), 7.44 (t, *J* = 7.4 Hz, 2H), 7.26 – 7.19 (m, 2H), 7.13 – 7.07 (m, 3H), 6.49 (broad, 1H). <sup>13</sup>C NMR (101 MHz, CDCl<sub>3</sub>) δ 139.10, 136.46, 133.16, 129.47, 129.17, 127.35, 125.65, 121.90.

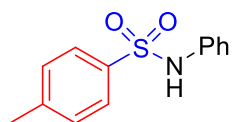

#### 4-Methyl-N-phenylbenzenesulfonamide (**3ac**)<sup>1</sup>

NMP (2.0 mL), isopropanol (31 μL, 2.0 equiv) and nitrobenzene **1a** (24.6 mg, 0.2 mmol, 1.0 equiv) were added to a rubber-septa-sealed tube containing *p*-tolylboronic acid **2c** (81.6 mg, 0.6 mmol, 3.0 equiv), K<sub>2</sub>S<sub>2</sub>O<sub>5</sub> (132 mg, 0.6 mmol, 3.0 equiv), Cu(MeCN)<sub>4</sub>PF<sub>6</sub> (14.8 mg, 0.04 mmol, 20 mol %) and 1,10-phenanthroline (3.6 mg, 0.02 mmol, 10 mol %) under Ar atmosphere via syringes. The mixture was then stirred at 70 °C for 48 h. After the scheduled time, the reaction mixture was diluted with 0.03 M HCl (60 mL) and extracted with EtOAc (20 mL × 3). The organic phases were combined and washed with brine twice before dried with anhydrous Na<sub>2</sub>SO<sub>4</sub>. The solvent was then evaporated under reduced pressure and the residue was purified directly by flash column chromatography (Eluent: 20% EtOAc/*n*-hexane) to afford the corresponding product **3ac**.

31.0 mg, 63% yield. White solid. M. p. 97.7 – 99.6 °C.

<sup>1</sup>H NMR (400 MHz, CDCl<sub>3</sub>) δ 7.67 (d, *J* = 7.6 Hz, 2H), 7.25 – 7.20 (m, 4H), 7.11 – 7.07 (m, 3H), 6.97 (broad, 1H), 2.37 (s, 3H). <sup>13</sup>C NMR (101 MHz, CDCl<sub>3</sub>) δ 144.01, 136.66, 136.16, 129.78, 129.43, 127.40, 125.41, 121.65, 21.67.

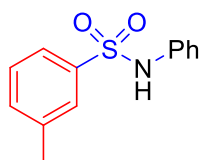

#### 3-Methyl-N-phenylbenzenesulfonamide (**3ad**)<sup>1</sup>

NMP (2.0 mL), isopropanol (31 μL, 2.0 equiv) and nitrobenzene **1a** (24.6 mg, 0.2 mmol, 1.0 equiv) were added to a rubber-septa-sealed tube containing *m*-tolylboronic

acid **2d** (81.6 mg, 0.6 mmol, 3.0 equiv), K<sub>2</sub>S<sub>2</sub>O<sub>5</sub> (132 mg, 0.6 mmol, 3.0 equiv), Cu(MeCN)<sub>4</sub>PF<sub>6</sub> (14.8 mg, 0.04 mmol, 20 mol %) and 1,10-phenanthroline (3.6 mg, 0.02 mmol, 10 mol %) under Ar atmosphere via syringes. The mixture was then stirred at 70 °C for 48 h. After the scheduled time, the reaction mixture was diluted with 0.03 M HCl (60 mL) and extracted with EtOAc (20 mL × 3). The organic phases were combined and washed with brine twice before dried with anhydrous Na<sub>2</sub>SO<sub>4</sub>. The solvent was then evaporated under reduced pressure and the residue was purified directly by flash column chromatography (Eluent: 20% EtOAc/*n*-hexane) to afford the corresponding product **3ad**.

27.5 mg, 56% yield. White solid. M. p. 96.2 – 97.7 °C.

<sup>1</sup>H NMR (400 MHz, CDCl<sub>3</sub>) δ 7.60 (s, 1H), 7.57 (d, *J* = 6.8 Hz, 1H), 7.35 – 7.28 (m, 2H), 7.23 (d, *J* = 7.3 Hz, 2H), 7.13 - 7.06 (m, 3H), 6.87 (broad, 1H), 2.35 (s, 3H). <sup>13</sup>C NMR (101 MHz, CDCl<sub>3</sub>) δ 139.40, 138.99, 136.57, 133.96, 129.44, 128.99, 127.69, 125.54, 124.50, 121.79, 21.41.

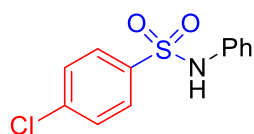

#### 4-Chloro-*N*-phenylbenzenesulfonamide (**3ae**)<sup>1</sup>

NMP (2.0 mL), isopropanol (31 μL, 2.0 equiv) and nitrobenzene **1a** (24.6 mg, 0.2 mmol, 1.0 equiv) were added to a rubber-septa-sealed tube containing 4-chlorobenzeneboronic acid **2e** (93.6 mg, 0.6 mmol, 3.0 equiv), K<sub>2</sub>S<sub>2</sub>O<sub>5</sub> (132 mg, 0.6 mmol, 3.0 equiv), Cu(MeCN)<sub>4</sub>PF<sub>6</sub> (14.8 mg, 0.04 mmol, 20 mol %) and 1,10-phenanthroline (3.6 mg, 0.02 mmol, 10 mol %) under Ar atmosphere via syringes. The mixture was then stirred at 70 °C for 48 h. After the scheduled time, the reaction mixture was diluted with 0.03 M HCl (60 mL) and extracted with EtOAc (20 mL × 3). The organic phases were combined and washed with brine twice before dried with anhydrous Na<sub>2</sub>SO<sub>4</sub>. The solvent was then evaporated under reduced pressure and the residue was purified directly by flash column chromatography (Eluent: 20% EtOAc/*n*-hexane) to afford the corresponding product **3ae**.

43.6 mg, 82% yield. White solid. M. p. 105.5 – 105.9 °C.

<sup>1</sup>H NMR (400 MHz, CDCl<sub>3</sub>) δ 7.69 (d, *J* = 7.4 Hz, 2H), 7.40 (d, *J* = 7.5 Hz, 2H), 7.28 – 7.24 (m, 3H), 7.15 (t, *J* = 7.3 Hz, 1H), 7.07 (d, *J* = 7.8 Hz, 2H), 6.82 (broad, 1H). <sup>13</sup>C

NMR (101 MHz, CDCl<sub>3</sub>)  $\delta$  139.76, 137.57, 136.08, 129.63, 129.50, 128.81, 126.04, 122.16.

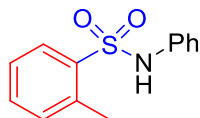

#### 2-Methyl-*N*-phenylbenzenesulfonamide (**3af**)<sup>1</sup>

NMP (2.0 mL), isopropanol (31  $\mu$ L, 2.0 equiv) and nitrobenzene **1a** (24.6 mg, 0.2 mmol, 1.0 equiv) were added to a rubber-septa-sealed tube containing *o*-tolylboronic acid **2f** (81.6 mg, 0.6 mmol, 3.0 equiv), K<sub>2</sub>S<sub>2</sub>O<sub>5</sub> (132 mg, 0.6 mmol, 3.0 equiv), Cu(MeCN)<sub>4</sub>PF<sub>6</sub> (14.8 mg, 0.04 mmol, 20 mol %) and 1,10-phenanthroline (3.6 mg, 0.02 mmol, 10 mol %) under Ar atmosphere via syringes. The mixture was then stirred at 70 °C for 48 h. After the scheduled time, the reaction mixture was diluted with 0.03 M HCl (60 mL) and extracted with EtOAc (20 mL  $\times$  3). The organic phases were combined and washed with brine twice before dried with anhydrous Na<sub>2</sub>SO<sub>4</sub>. The solvent was then evaporated under reduced pressure and the residue was purified directly by flash column chromatography (Eluent: 20% EtOAc/*n*-hexane) to afford the corresponding product **3af**.

39.6 mg, 80% yield. White solid. M. p. 139.7 – 140.4 °C.

<sup>1</sup>H NMR (400 MHz, CDCl<sub>3</sub>)  $\delta$  7.97 (d, *J* = 7.7 Hz, 1H), 7.42 (t, *J* = 7.3 Hz, 1H), 7.30 – 7.26 (m, 2H), 7.21 (t, *J* = 7.2 Hz, 2H), 7.07 (d, *J* = 7.5 Hz, 1H), 7.02 (d, *J* = 7.8 Hz, 2H), 6.95 (broad, 1H), 2.66 (s, 3H). <sup>13</sup>C NMR (101 MHz, CDCl<sub>3</sub>)  $\delta$  137.48, 137.31, 136.53, 133.29, 132.74, 130.14, 129.48, 126.43, 125.11, 120.71, 20.55.

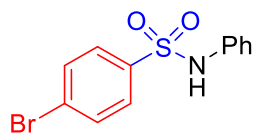

#### 4-Bromo-*N*-phenylbenzenesulfonamide (**3ag**)<sup>1</sup>

NMP (2.0 mL), isopropanol (31  $\mu$ L, 2.0 equiv) and nitrobenzene **1a** (24.6 mg, 0.2 mmol, 1.0 equiv) were added to a rubber-septa-sealed tube containing 4-bromobenzeneboronic acid **2g** (120 mg, 0.6 mmol, 3.0 equiv), K<sub>2</sub>S<sub>2</sub>O<sub>5</sub> (132 mg, 0.6 mmol, 3.0 equiv), Cu(MeCN)<sub>4</sub>PF<sub>6</sub> (14.8 mg, 0.04 mmol, 20 mol %) and 1,10-phenanthroline (3.6 mg, 0.02 mmol, 10 mol %) under Ar atmosphere via syringes. The mixture was then stirred at 70 °C for 48 h. After the scheduled time, the reaction

mixture was diluted with 0.03 M HCl (60 mL) and extracted with EtOAc (20 mL  $\times$  3). The organic phases were combined and washed with brine twice before dried with anhydrous Na<sub>2</sub>SO<sub>4</sub>. The solvent was then evaporated under reduced pressure and the residue was purified directly by flash column chromatography (Eluent: 15% EtOAc/*n*-hexane) to afford the corresponding product **3ag**.

49.8 mg, 80% yield. White solid. M. p. 118.5 – 119.0 °C.

<sup>1</sup>H NMR (400 MHz, CDCl<sub>3</sub>)  $\delta$  7.64 (d, *J* = 8.3 Hz, 2H), 7.57 (d, *J* = 7.3 Hz, 2H), 7.26 (t, *J* = 7.1 Hz, 2H), 7.14 (t, *J* = 7.1 Hz, 1H), 7.08 (d, *J* = 7.6 Hz, 2H), 7.00 (broad, 1H). <sup>13</sup>C NMR (101 MHz, CDCl<sub>3</sub>)  $\delta$  138.05, 136.09, 132.48, 129.61, 128.88, 128.28, 125.98, 122.05.

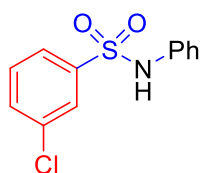

3-Chloro-*N*-phenylbenzenesulfonamide (**3ah**)<sup>2</sup>

NMP (2.0 mL), isopropanol (31  $\mu$ L, 2.0 equiv) and nitrobenzene **1a** (24.6 mg, 0.2 mmol, 1.0 equiv) were added to a rubber-septa-sealed tube containing 3-chlorobenzeneboronic acid **2h** (93.6 mg, 0.6 mmol, 3.0 equiv), K<sub>2</sub>S<sub>2</sub>O<sub>5</sub> (132 mg, 0.6 mmol, 3.0 equiv), Cu(MeCN)<sub>4</sub>PF<sub>6</sub> (14.8 mg, 0.04 mmol, 20 mol %) and 1,10-phenanthroline (3.6 mg, 0.02 mmol, 10 mol %) under Ar atmosphere via syringes. The mixture was then stirred at 70 °C for 48 h. After the scheduled time, the reaction mixture was diluted with 0.03 M HCl (60 mL) and extracted with EtOAc (20 mL  $\times$  3). The organic phases were combined and washed with brine twice before dried with anhydrous Na<sub>2</sub>SO<sub>4</sub>. The solvent was then evaporated under reduced pressure and the residue was purified directly by flash column chromatography (Eluent: 20% EtOAc/*n*-hexane) to afford the corresponding product **3ah**.

44.3 mg, 83% yield. White solid. M. p. 91.0 – 92.2 °C.

<sup>1</sup>H NMR (400 MHz, CDCl<sub>3</sub>)  $\delta$  7.77 (s, 1H), 7.63 (t, *J* = 7.9 Hz, 1H), 7.50 (d, *J* = 7.7 Hz, 1H), 7.37 (t, *J* = 7.7 Hz, 1H), 7.28 – 7.24 (m, 2H), 7.16 (d, *J* = 7.2 Hz, 1H), 7.08 (d, *J* = 6.9 Hz, 2H). <sup>13</sup>C NMR (101 MHz, CDCl<sub>3</sub>)  $\delta$  140.78, 136.01, 135.40, 133.33, 130.46, 129.62, 127.45, 126.04, 125.47, 122.10.

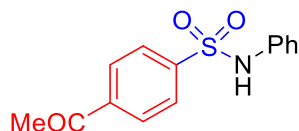

#### 4-Acetyl-*N*-phenylbenzenesulfonamide (**3ai**)<sup>3</sup>

NMP (2.0 mL), isopropanol (31  $\mu$ L, 2.0 equiv) and nitrobenzene **1a** (24.6 mg, 0.2 mmol, 1.0 equiv) were added to a rubber-septa-sealed tube containing 4-acetylbenzeneboronic acid **2i** (98.4 mg, 0.6 mmol, 3.0 equiv),  $K_2S_2O_5$  (132 mg, 0.6 mmol, 3.0 equiv),  $Cu(MeCN)_4PF_6$  (14.8 mg, 0.04 mmol, 20 mol %) and 1,10-phenanthroline (3.6 mg, 0.02 mmol, 10 mol %) under Ar atmosphere via syringes. The mixture was then stirred at 70  $^{\circ}C$  for 48 h. After the scheduled time, the reaction mixture was diluted with 0.03 M HCl (60 mL) and extracted with EtOAc (20 mL  $\times$  3). The organic phases were combined and washed with brine twice before dried with anhydrous  $Na_2SO_4$ . The solvent was then evaporated under reduced pressure and the residue was purified directly by flash column chromatography (Eluent: 30% EtOAc/*n*-hexane) to afford the corresponding product **3ai**.

42.3 mg, 77% yield. White solid. M. p. 103.6 – 104.9  $^{\circ}C$ .

$^1H$  NMR (400 MHz, acetone- $d_6$ )  $\delta$  9.16 (s, 1H), 8.08 (d,  $J$  = 8.7 Hz, 2H), 7.91 (d,  $J$  = 8.7 Hz, 2H), 7.31 – 7.20 (m, 4H), 7.14 – 7.02 (m, 1H), 2.61 (s, 3H).  $^{13}C$  NMR (101 MHz, Acetone- $d_6$ )  $\delta$  197.23, 144.36, 141.07, 138.33, 130.10, 129.64, 128.22, 125.70, 121.85, 26.94.

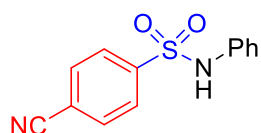

#### 4-Cyano-*N*-phenylbenzenesulfonamide (**3aj**)<sup>1</sup>

NMP (2.0 mL), isopropanol (31  $\mu$ L, 2.0 equiv) and nitrobenzene **1a** (24.6 mg, 0.2 mmol, 1.0 equiv) were added to a rubber-septa-sealed tube containing 4-cyanobenzeneboronic acid **2j** (88.2 mg, 0.6 mmol, 3.0 equiv),  $K_2S_2O_5$  (132 mg, 0.6 mmol, 3.0 equiv),  $Cu(MeCN)_4PF_6$  (14.8 mg, 0.04 mmol, 20 mol %) and 1,10-phenanthroline (3.6 mg, 0.02 mmol, 10 mol %) under Ar atmosphere via syringes. The mixture was then stirred at 70  $^{\circ}C$  for 48 h. After the scheduled time, the reaction mixture was diluted with 0.03 M HCl (60 mL) and extracted with EtOAc (20 mL  $\times$  3). The organic phases were combined and washed with brine twice before dried with anhydrous  $Na_2SO_4$ . The solvent was then evaporated under reduced pressure and the residue was purified directly by flash column chromatography (Eluent: 25% EtOAc/*n*-hexane) to afford the corresponding product **3aj**.

38.6 mg, 75% yield. White solid. M. p. 111.0 – 111.6 °C.

$^1\text{H}$  NMR (400 MHz,  $\text{CDCl}_3$ )  $\delta$  7.87 (d,  $J$  = 7.6 Hz, 2H), 7.72 (d,  $J$  = 7.5 Hz, 2H), 7.28 – 7.24 (m, 2H), 7.17 (t,  $J$  = 7.1 Hz, 1H), 7.07 (d,  $J$  = 7.7 Hz, 2H), 6.73 (broad, 1H).  $^{13}\text{C}$  NMR (101 MHz,  $\text{CDCl}_3$ )  $\delta$  143.17, 135.56, 132.99, 129.75, 127.98, 126.46, 122.36, 117.32, 116.84.

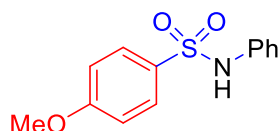

#### 4-Methoxy-*N*-phenylbenzenesulfonamide (**3ak**)<sup>1</sup>

NMP (2.0 mL), isopropanol (31  $\mu\text{L}$ , 2.0 equiv) and nitrobenzene **1a** (24.6 mg, 0.2 mmol, 1.0 equiv) were added to a rubber-septa-sealed tube containing 4-methoxybenzeneboronic acid **2k** (88.2 mg, 0.6 mmol, 3.0 equiv),  $\text{K}_2\text{S}_2\text{O}_5$  (132 mg, 0.6 mmol, 3.0 equiv),  $\text{Cu}(\text{MeCN})_4\text{PF}_6$  (14.8 mg, 0.04 mmol, 20 mol %) and 1,10-phenanthroline (3.6 mg, 0.02 mmol, 10 mol %) under Ar atmosphere via syringes. The mixture was then stirred at 70 °C for 48 h. After the scheduled time, the reaction mixture was diluted with 0.03 M HCl (60 mL) and extracted with EtOAc (20 mL  $\times$  3). The organic phases were combined and washed with brine twice before dried with anhydrous  $\text{Na}_2\text{SO}_4$ . The solvent was then evaporated under reduced pressure and the residue was purified directly by flash column chromatography (Eluent: 25% EtOAc/*n*-hexane) to afford the corresponding product **3ak**.

37.3 mg, 71% yield. White solid. M. p. 107.1 – 109.6 °C.

$^1\text{H}$  NMR (400 MHz,  $\text{CDCl}_3$ )  $\delta$  7.72 (d,  $J$  = 7.7 Hz, 2H), 7.22 (t,  $J$  = 7.2 Hz, 2H), 7.09 (t,  $J$  = 6.8 Hz, 3H), 6.88 (d,  $J$  = 7.6 Hz, 2H), 6.33 (s, 1H), 3.81 (s, 3H).  $^{13}\text{C}$  NMR (101 MHz,  $\text{CDCl}_3$ )  $\delta$  163.21, 136.78, 130.68, 129.55, 129.41, 125.34, 121.63, 114.29, 55.68.

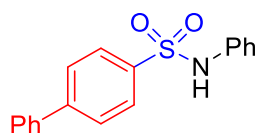

#### *N*-Phenyl-[1,1'-biphenyl]-4-sulfonamide (**3al**)<sup>1</sup>

NMP (2.0 mL), isopropanol (31  $\mu\text{L}$ , 2.0 equiv) and nitrobenzene **1a** (24.6 mg, 0.2 mmol, 1.0 equiv) were added to a rubber-septa-sealed tube containing 4-phenylbenzeneboronic acid **2l** (88.2 mg, 0.6 mmol, 3.0 equiv),  $\text{K}_2\text{S}_2\text{O}_5$  (132 mg, 0.6 mmol, 3.0 equiv),  $\text{Cu}(\text{MeCN})_4\text{PF}_6$  (14.8 mg, 0.04 mmol, 20 mol %) and 1,10-



phenanthroline (3.6 mg, 0.02 mmol, 10 mol %) under Ar atmosphere via syringes. The mixture was then stirred at 70 °C for 48 h. After the scheduled time, the reaction mixture was diluted with 0.03 M HCl (60 mL) and extracted with EtOAc (20 mL × 3). The organic phases were combined and washed with brine twice before dried with anhydrous Na<sub>2</sub>SO<sub>4</sub>. The solvent was then evaporated under reduced pressure and the residue was purified directly by flash column chromatography (Eluent: 20% EtOAc/*n*-hexane) to afford the corresponding product **3al**.

41.9 mg, 68% yield. White solid. M. p. 126.4 – 127.3 °C.

<sup>1</sup>H NMR (400 MHz, CDCl<sub>3</sub>) δ 7.88 – 7.82 (m, 2H), 7.64 (d, *J* = 7.6 Hz, 2H), 7.56 (d, *J* = 6.8 Hz, 2H), 7.47 – 7.40 (m, 3H), 7.28 – 7.24 (m, 2H), 7.15 – 7.13 (m, 3H), 6.79 (broad, 1H). <sup>13</sup>C NMR (101 MHz, CDCl<sub>3</sub>) δ 146.02, 139.23, 137.69, 136.59, 129.54, 129.17, 128.68, 127.91, 127.76, 127.43, 125.58, 121.76.

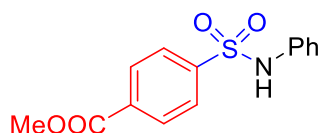

Methyl 4-(*N*-phenylsulfamoyl)benzoate (**3am**)

NMP (2.0 mL), isopropanol (31 μL, 2.0 equiv) and nitrobenzene **1a** (24.6 mg, 0.2 mmol, 1.0 equiv) were added to a rubber-septa-sealed tube containing (4-(methoxycarbonyl)phenyl)boronic acid **2m** (108 mg, 0.6 mmol, 3.0 equiv), K<sub>2</sub>S<sub>2</sub>O<sub>5</sub> (132 mg, 0.6 mmol, 3.0 equiv), Cu(MeCN)<sub>4</sub>PF<sub>6</sub> (14.8 mg, 0.04 mmol, 20 mol %) and 1,10-phenanthroline (3.6 mg, 0.02 mmol, 10 mol %) under Ar atmosphere via syringes. The mixture was then stirred at 70 °C for 48 h. After the scheduled time, the reaction mixture was diluted with 0.03 M HCl (60 mL) and extracted with EtOAc (20 mL × 3). The organic phases were combined and washed with brine twice before dried with anhydrous Na<sub>2</sub>SO<sub>4</sub>. The solvent was then evaporated under reduced pressure and the residue was purified directly by flash column chromatography (Eluent: 25% EtOAc/*n*-hexane) to afford the corresponding product **3am**.

43.5 mg, 75% yield. White solid. M. p. 125.2 – 127.0 °C.

<sup>1</sup>H NMR (400 MHz, acetone-*d*<sub>6</sub>) δ 9.13 (broad, 1H), 8.10 (d, *J* = 7.8 Hz, 2H), 7.90 (d, *J* = 7.7 Hz, 2H), 7.36 – 7.17 (m, 4H), 7.10 (t, *J* = 6.8 Hz, 1H), 3.90 (s, 3H). <sup>13</sup>C NMR (101 MHz, Acetone-*d*<sub>6</sub>) δ 166.11, 144.77, 138.39, 134.90, 130.91, 130.20, 128.32, 125.93, 122.24, 52.96. HRMS (ESI) Calc. for C<sub>14</sub>H<sub>13</sub>NNaO<sub>4</sub>S<sup>+</sup>: 314.0457, found: 314.0456.

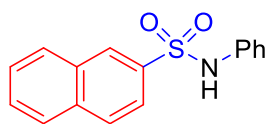

*N*-Phenylnaphthalene-2-sulfonamide (**3an**)<sup>1</sup>

NMP (2.0 mL), isopropanol (31  $\mu$ L, 2.0 equiv) and nitrobenzene **1a** (24.6 mg, 0.2 mmol, 1.0 equiv) were added to a rubber-septa-sealed tube containing naphthalen-2-ylboronic acid **2n** (103.2 mg, 0.6 mmol, 3.0 equiv), K<sub>2</sub>S<sub>2</sub>O<sub>5</sub> (132 mg, 0.6 mmol, 3.0 equiv), Cu(MeCN)<sub>4</sub>PF<sub>6</sub> (14.8 mg, 0.04 mmol, 20 mol %) and 1,10-phenanthroline (3.6 mg, 0.02 mmol, 10 mol %) under Ar atmosphere via syringes. The mixture was then stirred at 70 °C for 48 h. After the scheduled time, the reaction mixture was diluted with 0.03 M HCl (60 mL) and extracted with EtOAc (20 mL  $\times$  3). The organic phases were combined and washed with brine twice before dried with anhydrous Na<sub>2</sub>SO<sub>4</sub>. The solvent was then evaporated under reduced pressure and the residue was purified directly by flash column chromatography (Eluent: 25% EtOAc/*n*-hexane) to afford the corresponding product **3an**.

38.3 mg, 68% yield. White solid. M. p. 131.7 – 132.1 °C.

<sup>1</sup>H NMR (400 MHz, acetone-*d*<sub>6</sub>)  $\delta$  9.12 (s, 1H), 8.42 (s, 1H), 8.04 (t, *J* = 9.0 Hz, 2H), 7.97 (d, *J* = 7.9 Hz, 1H), 7.82 (dd, *J* = 8.7, 1.9 Hz, 1H), 7.69 – 7.56 (m, 2H), 7.28 – 7.15 (m, 4H), 7.04 – 6.98 (m, 1H). <sup>13</sup>C NMR (101 MHz, Acetone-*d*<sub>6</sub>)  $\delta$  138.74, 137.91, 135.71, 132.97, 130.15, 130.06, 129.98, 129.72, 129.27, 128.77, 128.47, 125.38, 123.28, 121.70.

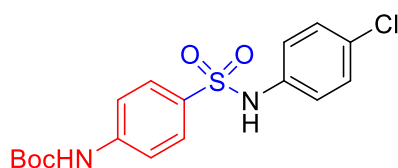

*tert*-Butyl (4-(*N*-(4-chlorophenyl)sulfamoyl)phenyl)carbamate (**3b**)

NMP (2.0 mL) and isopropanol (31  $\mu$ L, 2.0 equiv) were added to a rubber-septa-sealed tube containing 1-chloro-4-nitrobenzene **1i** (31.4 mg, 0.2 mmol, 1.0 equiv), (4-((*tert*-butoxycarbonyl)amino)phenyl)boronic acid **2bb** (142 mg, 0.6 mmol, 3.0 equiv), K<sub>2</sub>S<sub>2</sub>O<sub>5</sub> (132 mg, 0.6 mmol, 3.0 equiv), Cu(MeCN)<sub>4</sub>PF<sub>6</sub> (14.8 mg, 0.04 mmol, 20 mol %) and 1,10-phenanthroline (3.6 mg, 0.02 mmol, 10 mol %) under Ar atmosphere via syringes. The mixture was then stirred at 70 °C for 48 h. After the scheduled time, the reaction mixture was diluted with water (60 mL) and extracted with EtOAc (20 mL  $\times$

3). The organic phases were combined and washed with brine twice before dried with anhydrous  $\text{Na}_2\text{SO}_4$ . The solvent was then evaporated under reduced pressure and the residue was purified directly by flash column chromatography (Eluent: 25% EtOAc/*n*-hexane) to afford the corresponding product **3b**.

45.8 mg, 61% yield. White solid. M. p. 166.7 – 167.7 °C.

$^1\text{H}$  NMR (400 MHz, acetone- $d_6$ )  $\delta$  8.98 (broad, 1H), 8.84 (s, 1H), 7.73 – 7.65 (m, 4H), 7.28 (d,  $J$  = 7.6 Hz, 2H), 7.22 (d,  $J$  = 7.9 Hz, 2H), 1.47 (s, 9H).  $^{13}\text{C}$  NMR (101 MHz, Acetone- $d_6$ )  $\delta$  153.38, 137.96, 133.32, 132.45, 129.99, 129.22, 123.14, 121.34, 118.44, 80.99, 28.41. HRMS (ESI) Calc. for  $\text{C}_{17}\text{H}_{20}\text{ClN}_2\text{O}_4\text{S}^+$ : 383.0827, found: 383.0821.

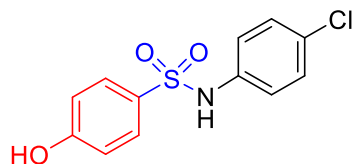

*N*-(4-Chlorophenyl)-4-hydroxybenzenesulfonamide (**3c**)

NMP (2.0 mL) and isopropanol (31  $\mu\text{L}$ , 2.0 equiv) were added to a rubber-septa-sealed tube containing 1-chloro-4-nitrobenzene **1i** (31.4 mg, 0.2 mmol, 1.0 equiv), 4-hydroxybenzeneboronic acid **2bc** (82.8 mg, 0.6 mmol, 3.0 equiv),  $\text{K}_2\text{S}_2\text{O}_5$  (132 mg, 0.6 mmol, 3.0 equiv),  $\text{Cu}(\text{MeCN})_4\text{PF}_6$  (14.8 mg, 0.04 mmol, 20 mol %) and 1,10-phenanthroline (3.6 mg, 0.02 mmol, 10 mol %) under Ar atmosphere via syringes. The mixture was then stirred at 70 °C for 48 h. After the scheduled time, the reaction mixture was diluted with 0.03 M HCl (60 mL) and extracted with EtOAc (20 mL  $\times$  3). The organic phases were combined and washed with brine twice before dried with anhydrous  $\text{Na}_2\text{SO}_4$ . The solvent was then evaporated under reduced pressure and the residue was purified directly by flash column chromatography (Eluent: 30% EtOAc/*n*-hexane) to afford the corresponding product **3c**.

34.5 mg, 61% yield. White solid. M. p. 155.1 – 156.4 °C.

$^1\text{H}$  NMR (400 MHz, acetone- $d_6$ )  $\delta$  9.12 (broad, 2H), 7.65 (d,  $J$  = 7.6 Hz, 2H), 7.27 (d,  $J$  = 7.6 Hz, 2H), 7.21 (d,  $J$  = 8.1 Hz, 2H), 6.92 (d,  $J$  = 7.6 Hz, 2H).  $^{13}\text{C}$  NMR (101 MHz, Acetone- $d_6$ )  $\delta$  162.28, 138.09, 131.15, 130.38, 129.94, 123.06, 116.44. HRMS (ESI) Calc. for  $\text{C}_{12}\text{H}_{10}\text{ClNNaO}_3\text{S}^+$ : 305.9962, found: 305.9966.

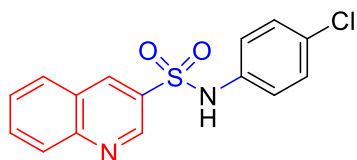

*N*-(4-Chlorophenyl)quinoline-3-sulfonamide (**3d**)

NMP (2.0 mL) and isopropanol (31  $\mu$ L, 2.0 equiv) were added to a rubber-septa-sealed tube containing 1-chloro-4-nitrobenzene **1i** (31.4 mg, 0.2 mmol, 1.0 equiv), quinolin-3-ylboronic acid **2bd** (104 mg, 0.6 mmol, 3.0 equiv),  $K_2S_2O_5$  (132 mg, 0.6 mmol, 3.0 equiv),  $Cu(MeCN)_4PF_6$  (14.8 mg, 0.04 mmol, 20 mol %) and 1,10-phenanthroline (3.6 mg, 0.02 mmol, 10 mol %) under Ar atmosphere via syringes. The mixture was then stirred at 70  $^{\circ}C$  for 48 h. After the scheduled time, the reaction mixture was diluted with water (60 mL) and extracted with EtOAc (20 mL  $\times$  3). The organic phases were combined and washed with brine twice before dried with anhydrous  $Na_2SO_4$ . The solvent was then evaporated under reduced pressure and the residue was purified directly by flash column chromatography (Eluent: 30% EtOAc/*n*-hexane) to afford the corresponding product **3d**.

27.6 mg, 44% yield. Off-white solid. M. p. 192.5 – 193.9  $^{\circ}C$ .

$^1H$  NMR (400 MHz, acetone- $d_6$ )  $\delta$  9.43 (broad, 1H), 9.13 (s, 1H), 8.78 (s, 1H), 8.13 (t,  $J$  = 9.3 Hz, 2H), 7.94 (t,  $J$  = 7.6 Hz, 1H), 7.75 (t,  $J$  = 7.5 Hz, 1H), 7.28 (s, 4H).  $^{13}C$  NMR (101 MHz, Acetone- $d_6$ )  $\delta$  150.24, 147.80, 147.50, 137.45, 137.21, 133.52, 131.02, 130.43, 130.35, 129.35, 127.30, 123.91. HRMS (ESI) Calc. for  $C_{15}H_{12}ClN_2O_2S^+$ :

319.0303, found: 319.0306.

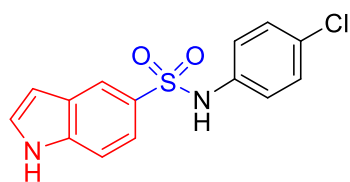

*N*-(4-Chlorophenyl)-1*H*-indole-5-sulfonamide (**3e**)

NMP (2.0 mL) and isopropanol (31  $\mu$ L, 2.0 equiv) were added to a rubber-septa-sealed tube containing 1-chloro-4-nitrobenzene **1i** (31.4 mg, 0.2 mmol, 1.0 equiv), (1*H*-indol-5-yl)boronic acid **2be** (96.6 mg, 0.6 mmol, 3.0 equiv),  $K_2S_2O_5$  (132 mg, 0.6 mmol, 3.0 equiv),  $Cu(MeCN)_4PF_6$  (14.8 mg, 0.04 mmol, 20 mol %) and 1,10-phenanthroline (3.6 mg, 0.02 mmol, 10 mol %) under Ar atmosphere via syringes. The mixture was then stirred at 70  $^{\circ}C$  for 48 h. After the scheduled time, the reaction

mixture was diluted with water (60 mL) and extracted with EtOAc (20 mL × 3). The organic phases were combined and washed with brine twice before dried with anhydrous Na<sub>2</sub>SO<sub>4</sub>. The solvent was then evaporated under reduced pressure and the residue was purified directly by flash column chromatography (Eluent: 30% EtOAc/*n*-hexane) to afford the corresponding product **3e**.

54.4 mg, 90% yield. White solid. M. p. 180.0 – 182.1 °C.

<sup>1</sup>H NMR (400 MHz, acetone-*d*<sub>6</sub>) δ 10.71 (broad, 1H), 8.95 (broad, 1H), 8.13 (s, 1H), 7.54 (s, 2H), 7.49 (s, 1H), 7.23 (s, 4H), 6.63 (s, 1H). <sup>13</sup>C NMR (101 MHz, Acetone- *d*<sub>6</sub>) δ 139.02, 138.43, 131.27, 129.85, 129.62, 128.42, 128.26, 122.77, 121.87, 120.64, 112.67, 103.93. HRMS (ESI) Calc. for C<sub>14</sub>H<sub>11</sub>ClN<sub>2</sub>NaO<sub>2</sub>S<sup>+</sup>: 329.0122, found: 329.0128.

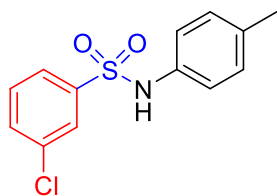

#### 3-Chloro-*N*-(*p*-tolyl)benzenesulfonamide (**3f**)<sup>4</sup>

NMP (2.0 mL) and isopropanol (31 μL, 2.0 equiv) were added to a rubber-septa-sealed tube containing 1-methyl-4-nitrobenzene **1f** (27.4 mg, 0.2 mmol, 1.0 equiv), 3-chlorobenzeneboronic acid **2h** (93.6 mg, 0.6 mmol, 3.0 equiv), K<sub>2</sub>S<sub>2</sub>O<sub>5</sub> (132 mg, 0.6 mmol, 3.0 equiv), Cu(MeCN)<sub>4</sub>PF<sub>6</sub> (14.8 mg, 0.04 mmol, 20 mol %) and 1,10-phenanthroline (3.6 mg, 0.02 mmol, 10 mol %) under Ar atmosphere via syringes. The mixture was then stirred at 70 °C for 48 h. After the scheduled time, the reaction mixture was diluted with 0.03 M HCl (60 mL) and extracted with EtOAc (20 mL × 3). The organic phases were combined and washed with brine twice before dried with anhydrous Na<sub>2</sub>SO<sub>4</sub>. The solvent was then evaporated under reduced pressure and the residue was purified directly by flash column chromatography (Eluent: 20% EtOAc/*n*-hexane) to afford the corresponding product **3f**.

44.4 mg, 80% yield. White solid. M. p. 93.6 – 95.2 °C.

<sup>1</sup>H NMR (400 MHz, CDCl<sub>3</sub>) δ 7.75 (s, 1H), 7.60 (d, *J* = 7.7 Hz, 1H), 7.50 (d, *J* = 7.9 Hz, 1H), 7.36 (t, *J* = 7.8 Hz, 1H), 7.06 (d, *J* = 7.5 Hz, 2H), 6.95 (d, *J* = 7.6 Hz, 2H), 6.75 (broad, 1H), 2.28 (s, 3H). <sup>13</sup>C NMR (101 MHz, CDCl<sub>3</sub>) δ 140.85, 136.25, 135.33, 133.20, 130.38, 130.16, 127.46, 125.52, 122.91, 21.01.

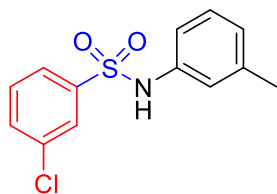

### 3-Chloro-*N*-(*m*-tolyl)benzenesulfonamide (**3g**)

NMP (2.0 mL) and isopropanol (31  $\mu$ L, 2.0 equiv) were added to a rubber-septa-sealed tube containing 1-methyl-3-nitrobenzene **1g** (27.4 mg, 0.2 mmol, 1.0 equiv), 3-chlorobenzeneboronic acid **2h** (93.6 mg, 0.6 mmol, 3.0 equiv),  $K_2S_2O_5$  (132 mg, 0.6 mmol, 3.0 equiv),  $Cu(MeCN)_4PF_6$  (14.8 mg, 0.04 mmol, 20 mol %) and 1,10-phenanthroline (3.6 mg, 0.02 mmol, 10 mol %) under Ar atmosphere via syringes. The mixture was then stirred at 70  $^{\circ}C$  for 48 h. After the scheduled time, the reaction mixture was diluted with 0.03 M HCl (60 mL) and extracted with EtOAc (20 mL  $\times$  3). The organic phases were combined and washed with brine twice before dried with anhydrous  $Na_2SO_4$ . The solvent was then evaporated under reduced pressure and the residue was purified directly by flash column chromatography (Eluent: 20% EtOAc/*n*-hexane) to afford the corresponding product **3g**.

36.6 mg, 66% yield. White solid. M. p. 119.9 – 121.1  $^{\circ}C$ .

$^1H$  NMR (400 MHz,  $CDCl_3$ )  $\delta$  7.79 (s, 1H), 7.65 (d,  $J$  = 7.7 Hz, 1H), 7.50 (d,  $J$  = 7.8 Hz, 1H), 7.37 (t,  $J$  = 7.7 Hz, 1H), 7.13 (t,  $J$  = 7.5 Hz, 1H), 6.96 – 6.87 (m, 3H), 6.22 (broad, 1H), 2.27 (s, 3H).  $^{13}C$  NMR (101 MHz,  $CDCl_3$ )  $\delta$  140.83, 139.67, 135.91, 135.33, 133.25, 130.41, 129.35, 127.46, 126.78, 125.46, 122.67, 118.93, 21.45. HRMS (ESI) Calc. for  $C_{13}H_{12}ClNNaO_2S^+$ : 304.0169, found: 304.0150.

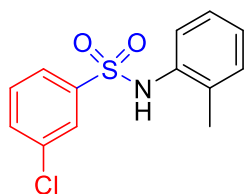

### 3-Chloro-*N*-(*o*-tolyl)benzenesulfonamide (**3h**)

NMP (2.0 mL), isopropanol (31  $\mu$ L, 2.0 equiv) and 1-methyl-2-nitrobenzene **1h** (27.4 mg, 0.2 mmol, 1.0 equiv) were added to a rubber-septa-sealed tube containing 3-chlorobenzeneboronic acid **2h** (93.6 mg, 0.6 mmol, 3.0 equiv),  $K_2S_2O_5$  (132 mg, 0.6 mmol, 3.0 equiv),  $Cu(MeCN)_4PF_6$  (14.8 mg, 0.04 mmol, 20 mol %) and 1,10-phenanthroline (3.6 mg, 0.02 mmol, 10 mol %) under Ar atmosphere via syringes. The

mixture was then stirred at 70 °C for 48 h. After the scheduled time, the reaction mixture was diluted with 0.03 M HCl (60 mL) and extracted with EtOAc (20 mL × 3). The organic phases were combined and washed with brine twice before dried with anhydrous Na<sub>2</sub>SO<sub>4</sub>. The solvent was then evaporated under reduced pressure and the residue was purified directly by flash column chromatography (Eluent: 20% EtOAc/*n*-hexane) to afford the corresponding product **3h**.

31.6 mg, 56% yield. White solid. M. p. 116.4 – 117.1 °C.

<sup>1</sup>H NMR (400 MHz, CDCl<sub>3</sub>) δ 7.74 (s, 1H), 7.59 (d, *J* = 7.7 Hz, 1H), 7.52 (d, *J* = 7.8 Hz, 1H), 7.37 (t, *J* = 7.7 Hz, 1H), 7.27 (d, *J* = 6.6 Hz, 1H), 7.19 – 7.10 (m, 3H), 6.38 (broad, 1H), 2.03 (s, 3H). <sup>13</sup>C NMR (101 MHz, CDCl<sub>3</sub>) δ 135.36, 133.97, 133.23, 131.94, 131.11, 130.42, 127.35, 127.26, 126.97, 125.38, 124.88, 17.72. HRMS (ESI) Calc. for C<sub>13</sub>H<sub>12</sub>ClNNaO<sub>2</sub>S<sup>+</sup>: 304.0169, found: 304.0162.

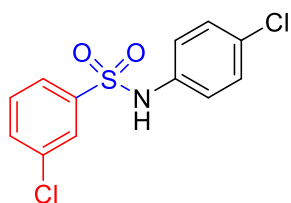

#### 3-Chloro-*N*-(4-chlorophenyl)benzenesulfonamide (**3i**)<sup>4</sup>

NMP (2.0 mL) and isopropanol (31 μL, 2.0 equiv) were added to a rubber-septa-sealed tube containing 1-chloro-4-nitrobenzene **1i** (31.4 mg, 0.2 mmol, 1.0 equiv), 3-chlorobenzeneboronic acid **2h** (93.6 mg, 0.6 mmol, 3.0 equiv), K<sub>2</sub>S<sub>2</sub>O<sub>5</sub> (132 mg, 0.6 mmol, 3.0 equiv), Cu(MeCN)<sub>4</sub>PF<sub>6</sub> (14.8 mg, 0.04 mmol, 20 mol %) and 1,10-phenanthroline (3.6 mg, 0.02 mmol, 10 mol %) under Ar atmosphere via syringes. The mixture was then stirred at 70 °C for 48 h. After the scheduled time, the reaction mixture was diluted with 0.03 M HCl (60 mL) and extracted with EtOAc (20 mL × 3). The organic phases were combined and washed with brine twice before dried with anhydrous Na<sub>2</sub>SO<sub>4</sub>. The solvent was then evaporated under reduced pressure and the residue was purified directly by flash column chromatography (Eluent: 20% EtOAc/*n*-hexane) to afford the corresponding product **3i**.

55.5 mg, 92% yield. White solid. M. p. 102.6 – 103.3 °C.

<sup>1</sup>H NMR (400 MHz, CDCl<sub>3</sub>) δ 7.79 (s, 1H), 7.62 (d, *J* = 7.8 Hz, 1H), 7.54 (d, *J* = 7.9 Hz, 1H), 7.40 (t, *J* = 7.8 Hz, 1H), 7.24 (d, *J* = 7.2 Hz, 2H), 7.04 (d, *J* = 7.3 Hz, 2H), 6.93

(broad, 1H).  $^{13}\text{C}$  NMR (101 MHz,  $\text{CDCl}_3$ )  $\delta$  140.47, 135.59, 134.51, 133.58, 131.80, 130.58, 129.77, 127.39, 125.45, 123.57.

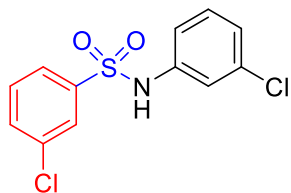

### 3-Chloro-*N*-(3-chlorophenyl)benzenesulfonamide (**3j**)

NMP (2.0 mL) and isopropanol (31  $\mu\text{L}$ , 2.0 equiv) were added to a rubber-septa-sealed tube containing 1-chloro-3-nitrobenzene **1j** (31.4 mg, 0.2 mmol, 1.0 equiv), 3-chlorobenzeneboronic acid **2h** (93.6 mg, 0.6 mmol, 3.0 equiv),  $\text{K}_2\text{S}_2\text{O}_5$  (132 mg, 0.6 mmol, 3.0 equiv),  $\text{Cu}(\text{MeCN})_4\text{PF}_6$  (14.8 mg, 0.04 mmol, 20 mol %) and 1,10-phenanthroline (3.6 mg, 0.02 mmol, 10 mol %) under Ar atmosphere via syringes. The mixture was then stirred at 70  $^\circ\text{C}$  for 48 h. After the scheduled time, the reaction mixture was diluted with 0.03 M HCl (60 mL) and extracted with EtOAc (20 mL  $\times$  3). The organic phases were combined and washed with brine twice before dried with anhydrous  $\text{Na}_2\text{SO}_4$ . The solvent was then evaporated under reduced pressure and the residue was purified directly by flash column chromatography (Eluent: 20% EtOAc/*n*-hexane) to afford the corresponding product **3j**.

53.7 mg, 89% yield. White solid. M. p. 115.5 – 119.3  $^\circ\text{C}$ .

$^1\text{H}$  NMR (400 MHz,  $\text{CDCl}_3$ )  $\delta$  7.82 (s, 1H), 7.67 (d,  $J$  = 7.8 Hz, 1H), 7.54 (d,  $J$  = 8.0 Hz, 1H), 7.41 (t,  $J$  = 7.9 Hz, 1H), 7.19 (t,  $J$  = 7.8 Hz, 1H), 7.12 (d,  $J$  = 8.6 Hz, 2H), 6.99 (d,  $J$  = 7.9 Hz, 1H).  $^{13}\text{C}$  NMR (101 MHz,  $\text{CDCl}_3$ )  $\delta$  140.52, 137.30, 135.65, 135.26, 133.66, 130.63, 127.42, 126.03, 125.44, 121.65, 119.55. HRMS (ESI) Calc. for  $\text{C}_{12}\text{H}_9\text{Cl}_2\text{NNaO}_2\text{S}^+$ : 323.9623, found: 323.9611.

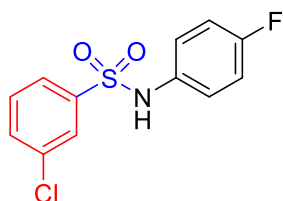

### 3-Chloro-*N*-(4-Fluorophenyl)benzenesulfonamide (**3k**)

NMP (2.0 mL), isopropanol (31  $\mu\text{L}$ , 2.0 equiv) and 1-fluoro-4-nitrobenzene **1k** (28.2 mg, 0.2 mmol, 1.0 equiv) were added to a rubber-septa-sealed tube containing 3-chlorobenzeneboronic acid **2h** (93.6 mg, 0.6 mmol, 3.0 equiv),  $\text{K}_2\text{S}_2\text{O}_5$  (132 mg, 0.6



mmol, 3.0 equiv), Cu(MeCN)<sub>4</sub>PF<sub>6</sub> (14.8 mg, 0.04 mmol, 20 mol %) and 1,10-phenanthroline (3.6 mg, 0.02 mmol, 10 mol %) under Ar atmosphere via syringes. The mixture was then stirred at 70 °C for 48 h. After the scheduled time, the reaction mixture was diluted with 0.03 M HCl (60 mL) and extracted with EtOAc (20 mL × 3). The organic phases were combined and washed with brine twice before dried with anhydrous Na<sub>2</sub>SO<sub>4</sub>. The solvent was then evaporated under reduced pressure and the residue was purified directly by flash column chromatography (Eluent: 20% EtOAc/*n*-hexane) to afford the corresponding product **3k**.

49.4 mg, 87% yield. White solid. M. p. 98.0 – 98.5 °C.

<sup>1</sup>H NMR (400 MHz, CDCl<sub>3</sub>) δ 7.75 (s, 1H), 7.60 (d, *J* = 7.7 Hz, 1H), 7.52 (d, *J* = 7.9 Hz, 1H), 7.38 (t, *J* = 7.8 Hz, 1H), 7.07 – 7.05 (m, 2H), 6.95 (t, *J* = 7.7 Hz, 2H), 6.60 (broad, 1H). <sup>13</sup>C NMR (101 MHz, CDCl<sub>3</sub>) δ 161.1 (d, *J*<sub>F</sub> = 247.1 Hz), 140.39, 135.48, 133.44, 131.75 (d, *J*<sub>F</sub> = 3.0 Hz), 130.50, 127.42, 125.48, 125.15 (d, *J*<sub>F</sub> = 8.5 Hz), 116.44 (d, *J*<sub>F</sub> = 22.9 Hz). <sup>19</sup>F NMR (376 MHz, CDCl<sub>3</sub>) δ -115.34. HRMS (ESI) Calc. for C<sub>12</sub>H<sub>9</sub>ClFNNaO<sub>2</sub>S<sup>+</sup>: 307.9919, found: 307.9901.

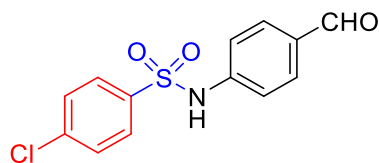

#### 4-Chloro-*N*-(4-formylphenyl)benzenesulfonamide (**3l**)

NMP (2.0 mL) and isopropanol (31 μL, 2.0 equiv) were added to a rubber-septa-sealed tube containing 4-nitrobenzaldehyde **1l** (30.2 mg, 0.2 mmol, 1.0 equiv), 4-chlorobenzeneboronic acid **2e** (93.6 mg, 0.6 mmol, 3.0 equiv), K<sub>2</sub>S<sub>2</sub>O<sub>5</sub> (132 mg, 0.6 mmol, 3.0 equiv), Cu(MeCN)<sub>4</sub>PF<sub>6</sub> (14.8 mg, 0.04 mmol, 20 mol %) and 1,10-phenanthroline (3.6 mg, 0.02 mmol, 10 mol %) under Ar atmosphere via syringes. The mixture was then stirred at 70 °C for 48 h. After the scheduled time, the reaction mixture was diluted with 0.03 M HCl (60 mL) and extracted with EtOAc (20 mL × 3). The organic phases were combined and washed with brine twice before dried with anhydrous Na<sub>2</sub>SO<sub>4</sub>. The solvent was then evaporated under reduced pressure and the residue was purified directly by flash column chromatography (Eluent: 25% EtOAc/*n*-hexane) to afford the corresponding product **3l**.

44.3 mg, 76% yield. White solid. M. p. 161.1 – 163.1 °C.

$^1\text{H}$  NMR (400 MHz, acetone- $d_6$ )  $\delta$  9.90 (s, 1H), 9.68 (s, 1H), 7.91 (d,  $J$  = 7.8 Hz, 2H), 7.83 (d,  $J$  = 7.8 Hz, 2H), 7.61 (d,  $J$  = 7.8 Hz, 2H), 7.43 (d,  $J$  = 7.8 Hz, 2H).  $^{13}\text{C}$  NMR (101 MHz, Acetone- $d_6$ )  $\delta$  191.58, 144.05, 139.42, 136.81, 133.70, 131.94, 130.49, 129.91, 120.05. HRMS (ESI) Calc. for  $\text{C}_{13}\text{H}_{11}\text{ClNO}_3\text{S}^+$ : 296.0143, found: 296.0130.

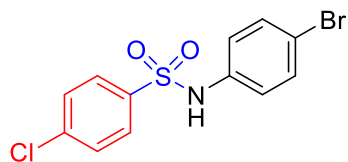

*N*-(4-Bromophenyl)-4-chlorobenzenesulfonamide (**3m**)

NMP (2.0 mL) and isopropanol (31  $\mu\text{L}$ , 2.0 equiv) were added to a rubber-septa-sealed tube containing 1-bromo-4-nitrobenzene **1m** (40.2 mg, 0.2 mmol, 1.0 equiv), 4-chlorobenzeneboronic acid **2e** (93.6 mg, 0.6 mmol, 3.0 equiv),  $\text{K}_2\text{S}_2\text{O}_5$  (132 mg, 0.6 mmol, 3.0 equiv),  $\text{Cu}(\text{MeCN})_4\text{PF}_6$  (14.8 mg, 0.04 mmol, 20 mol %) and 1,10-phenanthroline (3.6 mg, 0.02 mmol, 10 mol %) under Ar atmosphere via syringes. The mixture was then stirred at 70  $^\circ\text{C}$  for 48 h. After the scheduled time, the reaction mixture was diluted with 0.03 M HCl (60 mL) and extracted with EtOAc (20 mL  $\times$  3). The organic phases were combined and washed with brine twice before dried with anhydrous  $\text{Na}_2\text{SO}_4$ . The solvent was then evaporated under reduced pressure and the residue was purified directly by flash column chromatography (Eluent: 20% EtOAc/*n*-hexane) to afford the corresponding product **3m**.

59.7 mg, 87% yield. Off-white solid. M. p. 122.0 – 122.2  $^\circ\text{C}$ .

$^1\text{H}$  NMR (400 MHz, acetone- $d_6$ )  $\delta$  9.20 (broad, 1H), 7.80 (d,  $J$  = 8.8 Hz, 2H), 7.58 (d,  $J$  = 8.8 Hz, 2H), 7.44 (d,  $J$  = 8.8 Hz, 2H), 7.17 (d,  $J$  = 8.8 Hz, 2H).  $^{13}\text{C}$  NMR (101 MHz, Acetone- $d_6$ )  $\delta$  139.57, 139.24, 137.78, 133.09, 130.22, 129.74, 123.75, 118.27. HRMS (ESI) Calc. for  $\text{C}_{12}\text{H}_9\text{BrClINaO}_2\text{S}^+$ : 367.9118, found: 367.9114.

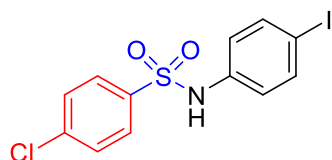

4-Chloro-*N*-(4-iodophenyl)benzenesulfonamide (**3n**)

NMP (2.0 mL) and isopropanol (31  $\mu\text{L}$ , 2.0 equiv) were added to a rubber-septa-sealed tube containing 1-iodo-4-nitrobenzene **1n** (49.8 mg, 0.2 mmol, 1.0 equiv), 4-chlorobenzeneboronic acid **2e** (93.6 mg, 0.6 mmol, 3.0 equiv),  $\text{K}_2\text{S}_2\text{O}_5$  (132 mg, 0.6

mmol, 3.0 equiv), Cu(MeCN)<sub>4</sub>PF<sub>6</sub> (14.8 mg, 0.04 mmol, 20 mol %) and 1,10-phenanthroline (3.6 mg, 0.02 mmol, 10 mol %) under Ar atmosphere via syringes. The mixture was then stirred at 70 °C for 48 h. After the scheduled time, the reaction mixture was diluted with 0.03 M HCl (60 mL) and extracted with EtOAc (20 mL × 3). The organic phases were combined and washed with brine twice before dried with anhydrous Na<sub>2</sub>SO<sub>4</sub>. The solvent was then evaporated under reduced pressure and the residue was purified directly by flash column chromatography (Eluent: 20% EtOAc/*n*-hexane) to afford the corresponding product **3n**.

66.8 mg, 86% yield. Off-white solid. M. p. 130.1 – 131.5 °C.

<sup>1</sup>H NMR (400 MHz, acetone-*d*<sub>6</sub>) δ 9.15 (broad, 1H), 7.80 (d, *J* = 7.3 Hz, 2H), 7.64 – 7.58 (m, 4H), 7.05 (d, *J* = 7.3 Hz, 2H). <sup>13</sup>C NMR (101 MHz, Acetone-*d*<sub>6</sub>) δ 139.69, 139.42, 139.25, 138.57, 130.36, 129.86, 123.92, 89.01. HRMS (ESI) Calc. for C<sub>12</sub>H<sub>9</sub>ClINNaO<sub>2</sub>S<sup>+</sup>: 415.8979, found: 415.8975.

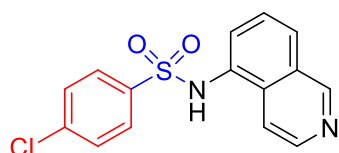

#### 4-Chloro-*N*-(isoquinolin-5-yl)benzenesulfonamide (**3o**)

NMP (2.0 mL) and isopropanol (31 μL, 2.0 equiv) were added to a rubber-septa-sealed tube containing 5-nitroisoquinoline **1o** (34.8 mg, 0.2 mmol, 1.0 equiv), 4-chlorobenzeneboronic acid **2e** (93.6 mg, 0.6 mmol, 3.0 equiv), K<sub>2</sub>S<sub>2</sub>O<sub>5</sub> (132 mg, 0.6 mmol, 3.0 equiv), Cu(MeCN)<sub>4</sub>PF<sub>6</sub> (14.8 mg, 0.04 mmol, 20 mol %) and 1,10-phenanthroline (3.6 mg, 0.02 mmol, 10 mol %) under Ar atmosphere via syringes. The mixture was then stirred at 70 °C for 48 h. After the scheduled time, the reaction mixture was diluted with water (60 mL) and extracted with EtOAc (20 mL × 3). The organic phases were combined and washed with brine twice before dried with anhydrous Na<sub>2</sub>SO<sub>4</sub>. The solvent was then evaporated under reduced pressure and the residue was purified directly by flash column chromatography (Eluent: 40% EtOAc/*n*-hexane) to afford the corresponding product **3o**.

38.7 mg, 61% yield. White solid. M. p. 202.0 – 204.2 °C.

<sup>1</sup>H NMR (400 MHz, acetone-*d*<sub>6</sub>) δ 9.27 (s, 1H), 9.09 (broad, 1H), 8.44 (d, *J* = 5.6 Hz, 1H), 8.02 (d, *J* = 7.4 Hz, 1H), 7.90 (d, *J* = 5.6 Hz, 1H), 7.73 (d, *J* = 7.8 Hz, 2H), 7.64 – 7.58 (q, *J* = 7.3 Hz, 2H), 7.52 (d, *J* = 7.8 Hz, 2H). <sup>13</sup>C NMR (101 MHz, Acetone-*d*<sub>6</sub>) δ

153.55, 144.30, 139.77, 139.53, 133.12, 132.62, 130.36, 130.21, 129.91, 128.41, 128.03, 127.60, 116.30. HRMS (ESI) Calc. for  $C_{15}H_{12}ClN_2O_2S^+$ : 319.0303, found: 319.0319.

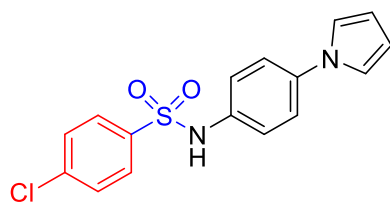

*N*-(4-(1*H*-Pyrrol-1-yl)phenyl)-4-chlorobenzenesulfonamide (**3p**)

NMP (2.0 mL) and isopropanol (31  $\mu$ L, 2.0 equiv) were added to a rubber-septa-sealed tube containing 1-(4-nitrophenyl)-1*H*-pyrrole **1p** (37.6 mg, 0.2 mmol, 1.0 equiv), 4-chlorobenzeneboronic acid **2e** (93.6 mg, 0.6 mmol, 3.0 equiv),  $K_2S_2O_5$  (132 mg, 0.6 mmol, 3.0 equiv),  $Cu(MeCN)_4PF_6$  (14.8 mg, 0.04 mmol, 20 mol %) and 1,10-phenanthroline (3.6 mg, 0.02 mmol, 10 mol %) under Ar atmosphere via syringes. The mixture was then stirred at 70  $^{\circ}C$  for 48 h. After the scheduled time, the reaction mixture was diluted with water (60 mL) and extracted with EtOAc (20 mL  $\times$  3). The organic phases were combined and washed with brine twice before dried with anhydrous  $Na_2SO_4$ . The solvent was then evaporated under reduced pressure and the residue was purified directly by flash column chromatography (Eluent: 20% EtOAc/*n*-hexane) to afford the corresponding product **3p**.

47.0 mg, 71% yield. Light yellow solid. M. p. 191.6 – 191.9  $^{\circ}C$ .

$^1H$  NMR (400 MHz, acetone- $d_6$ )  $\delta$  9.10 (s, 1H), 7.79 (d,  $J$  = 7.5 Hz, 2H), 7.58 (d,  $J$  = 7.6 Hz, 2H), 7.45 (d,  $J$  = 7.5 Hz, 2H), 7.29 (d,  $J$  = 7.5 Hz, 2H), 7.18 (s, 2H), 6.25 (s, 2H).  $^{13}C$  NMR (101 MHz, Acetone- $d_6$ )  $\delta$  139.60, 139.53, 138.85, 135.62, 130.28, 129.89, 123.94, 121.38, 119.80, 111.41. HRMS (ESI) Calc. for  $C_{16}H_{14}ClN_2O_2S^+$ : 333.0459, found: 333.0458.

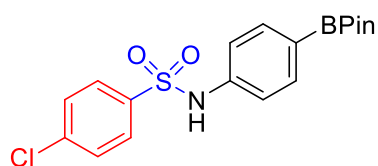

4-chloro-*N*-(4-(4,4,5,5-tetramethyl-1,3,2-dioxaborolan-2-yl)phenyl)benzenesulfonamide (**3q**)

NMP (2.0 mL) and isopropanol (31  $\mu$ L, 2.0 equiv) were added to a rubber-septa-sealed tube containing 4,4,5,5-tetramethyl-2-(4-nitrophenyl)-1,3,2-dioxaborolane **1q** (49.8

mg, 0.2 mmol, 1.0 equiv), 4-chlorobenzeneboronic acid **2e** (93.6 mg, 0.6 mmol, 3.0 equiv),  $K_2S_2O_5$  (132 mg, 0.6 mmol, 3.0 equiv),  $Cu(MeCN)_4PF_6$  (14.8 mg, 0.04 mmol, 20 mol %) and 1,10-phenanthroline (3.6 mg, 0.02 mmol, 10 mol %) under Ar atmosphere via syringes. The mixture was then stirred at 70 °C for 48 h. After the scheduled time, the reaction mixture was diluted with water (60 mL) and extracted with EtOAc (20 mL  $\times$  3). The organic phases were combined and washed with brine twice before dried with anhydrous  $Na_2SO_4$ . The solvent was then evaporated under reduced pressure and the residue was purified directly by flash column chromatography (Eluent: 20% EtOAc/*n*-hexane) to afford the corresponding product **3q**.

34.6 mg, 45% yield. White solid. M. p. 191.6 – 193.1 °C.

$^1H$  NMR (400 MHz, acetone- $d_6$ )  $\delta$  9.21 (s, 1H), 7.83 (d,  $J$  = 8.3 Hz, 2H), 7.63 (d,  $J$  = 7.8 Hz, 2H), 7.58 (d,  $J$  = 8.2 Hz, 2H), 7.24 (d,  $J$  = 7.7 Hz, 2H), 1.30 (s, 12H).  $^{13}C$  NMR (101 MHz, Acetone- $d_6$ )  $\delta$  141.37, 139.77, 139.63, 136.79, 130.33, 129.91, 120.23, 84.65, 25.31. HRMS (ESI) Calc. for  $C_{18}H_{22}BClNO_4S^+$ : 394.1046, found: 394.1048.

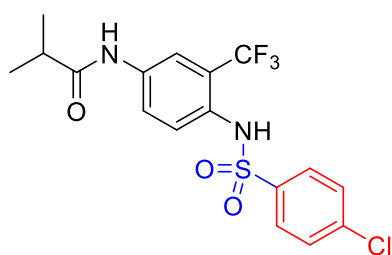

*N*-(4-((4-Chlorophenyl)sulfonamido)-3-(trifluoromethyl)phenyl)isobutyramide (**4a**)

NMP (2.0 mL) and isopropanol (31  $\mu$ L, 2.0 equiv) were added to a rubber-septa-sealed tube containing Flutamide **1r** (55.2 mg, 0.2 mmol, 1.0 equiv), 4-chlorobenzeneboronic acid **2e** (93.6 mg, 0.6 mmol, 3.0 equiv),  $K_2S_2O_5$  (132 mg, 0.6 mmol, 3.0 equiv),  $Cu(MeCN)_4PF_6$  (14.8 mg, 0.04 mmol, 20 mol %) and 1,10-phenanthroline (3.6 mg, 0.02 mmol, 10 mol %) under Ar atmosphere via syringes. The mixture was then stirred at 70 °C for 48 h. After the scheduled time, the reaction mixture was diluted with water (60 mL) and extracted with EtOAc (20 mL  $\times$  3). The organic phases were combined and washed with brine twice before dried with anhydrous  $Na_2SO_4$ . The solvent was then evaporated under reduced pressure and the residue was purified directly by flash column chromatography (Eluent: 35% EtOAc/*n*-hexane) to afford the corresponding product **4a**.

62.5 mg, 75% yield. White solid. M. p. 149.3 – 149.6 °C.

$^1\text{H}$  NMR (400 MHz, acetone- $d_6$ )  $\delta$  9.39 (s, 1H), 8.57 (s, 1H), 8.14 (s, 1H), 7.84 (d,  $J = 8.7$  Hz, 1H), 7.79 (d,  $J = 7.6$  Hz, 2H), 7.62 (d,  $J = 7.7$  Hz, 2H), 7.39 (d,  $J = 8.7$  Hz, 1H), 2.63 (dt,  $J = 13.3, 6.6$  Hz, 1H), 1.16 (d,  $J = 6.6$  Hz, 6H).  $^{13}\text{C}$  NMR (101 MHz, Acetone- $d_6$ )  $\delta$  176.53, 140.52, 139.54 (d,  $J_F = 18.8$  Hz), 130.16, 130.09, 129.79, 129.04, 126.67 (q,  $J_F = 29.9$  Hz), 125.55, 123.76, 122.83, 117.94 (q,  $J_F = 5.5$  Hz), 36.70, 19.72.  $^{19}\text{F}$  NMR (376 MHz, Acetone- $d_6$ )  $\delta$  -60.24. HRMS (ESI) Calc. for  $\text{C}_{17}\text{H}_{17}\text{ClF}_3\text{N}_2\text{O}_3\text{S}^+$ : 421.0595, found: 421.0601.

References of Analytical Data:

1. *Org. Biomol. Chem.*, **2018**, 16, 5016 – 5020.
2. *ACS Med. Chem. Lett.*, **2016**, 7, 1028 – 1033.
3. *Angew. Chem. Int. Ed.*, **2016**, 55, 2450 – 2453.
4. *Crystal Growth and Design*, **2010**, 10, 4550 – 4564.

5.  $^1\text{H}$ ,  $^{13}\text{C}$  and  $^{19}\text{F}$  NMR spectra of compounds 3 and 4.

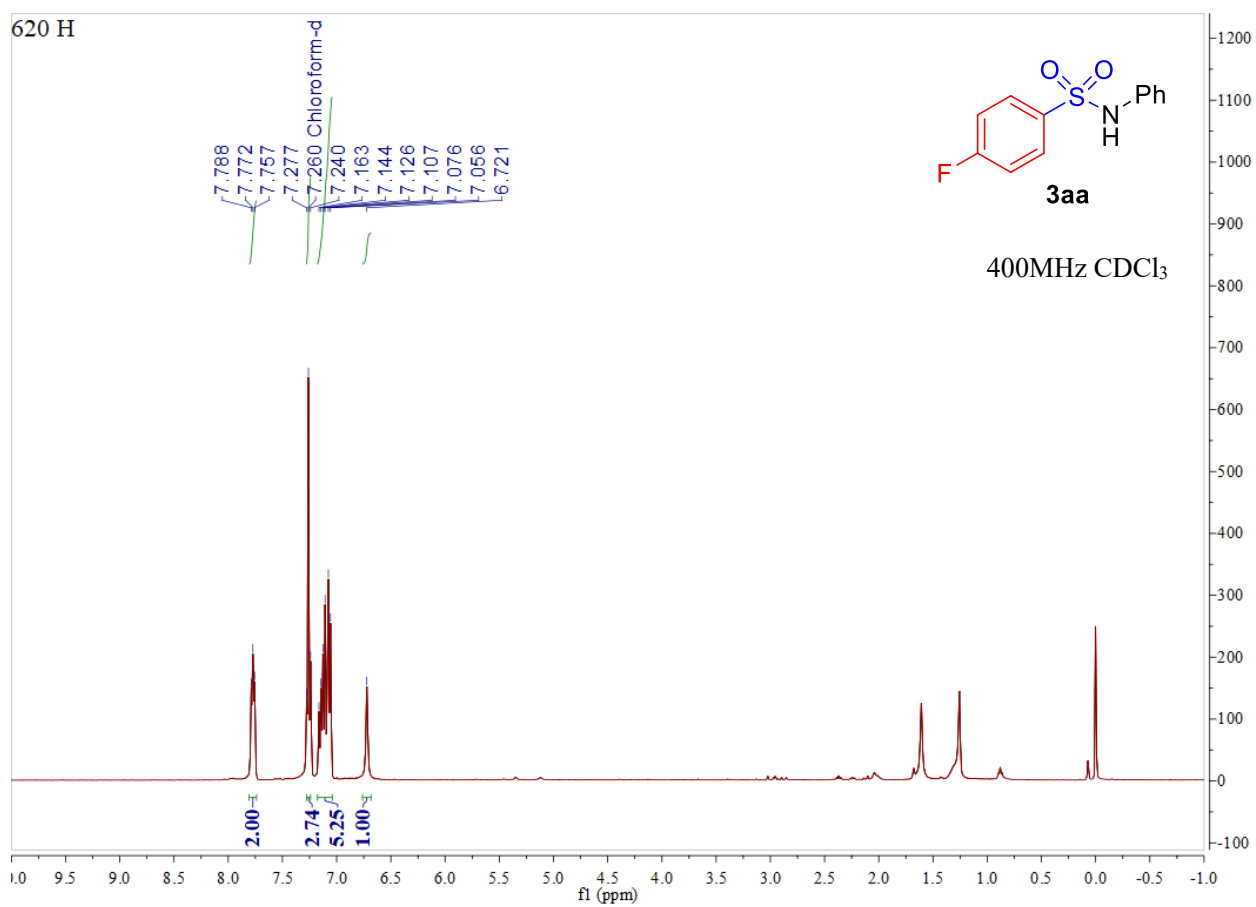

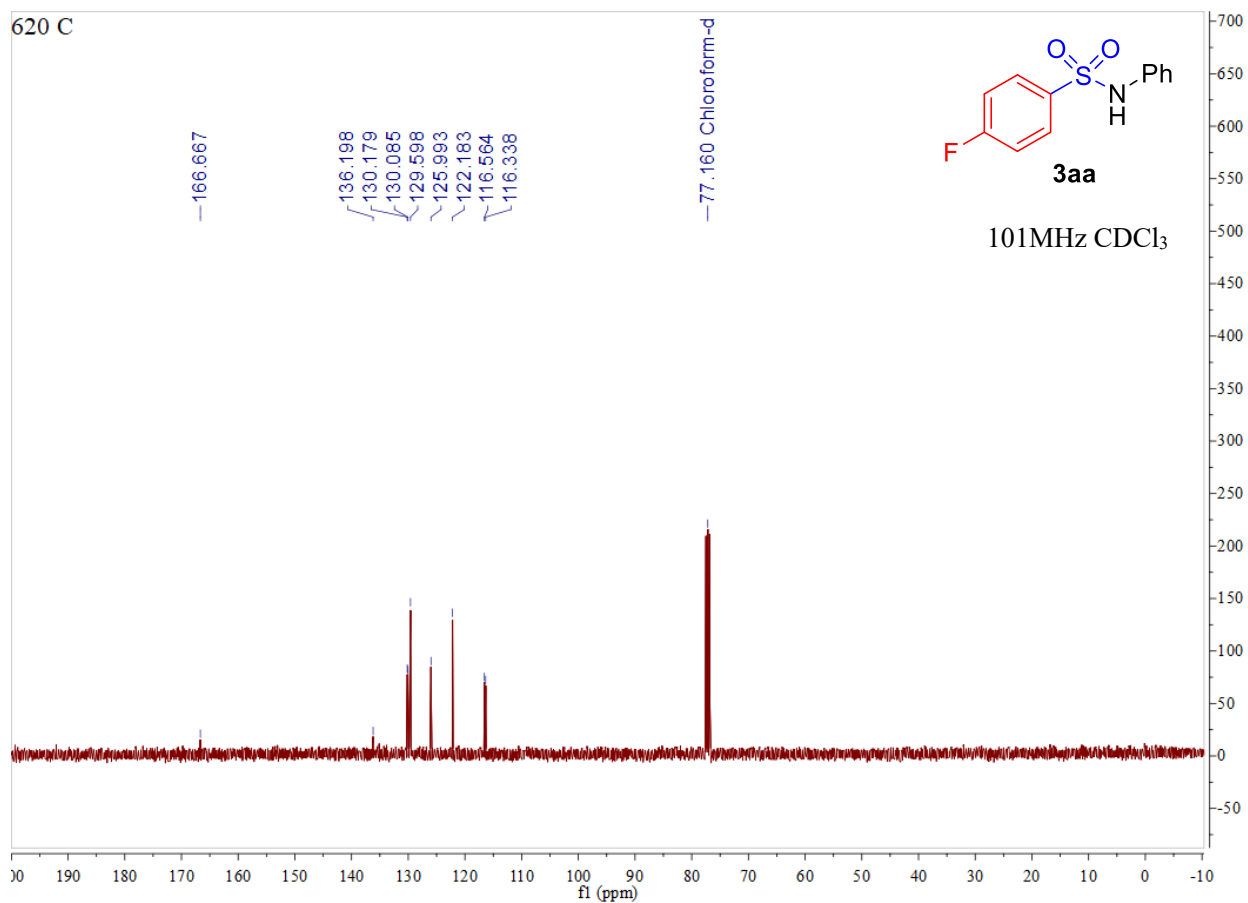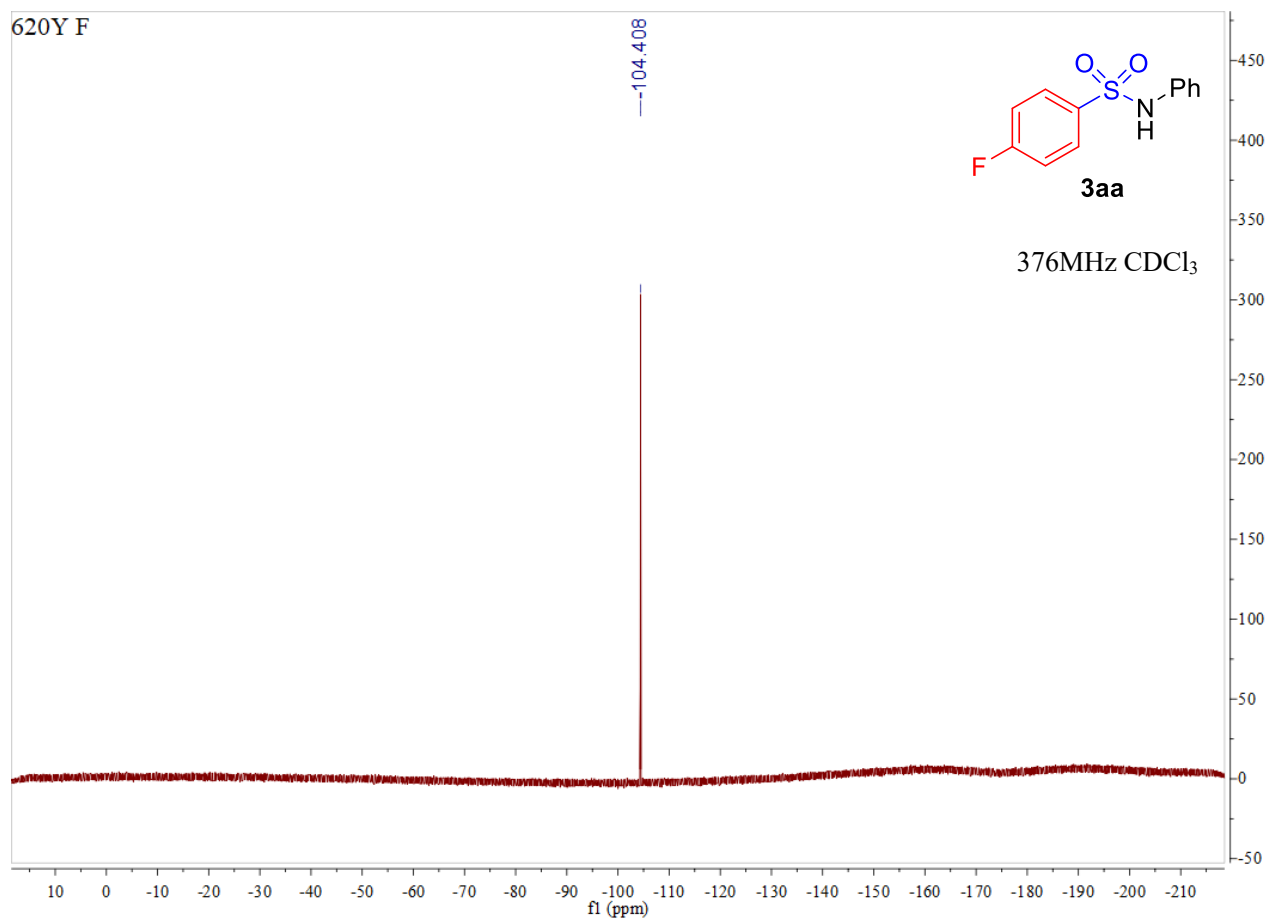



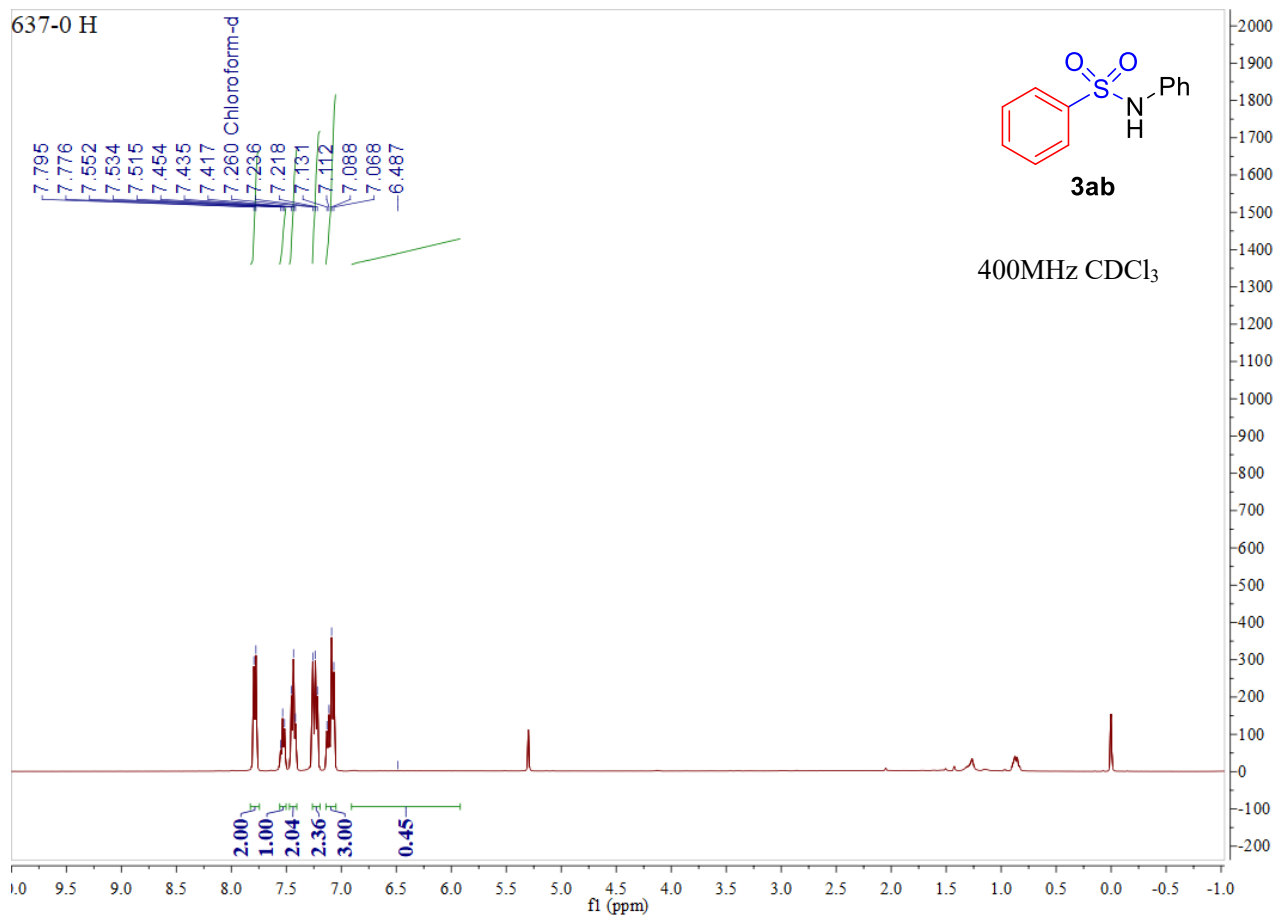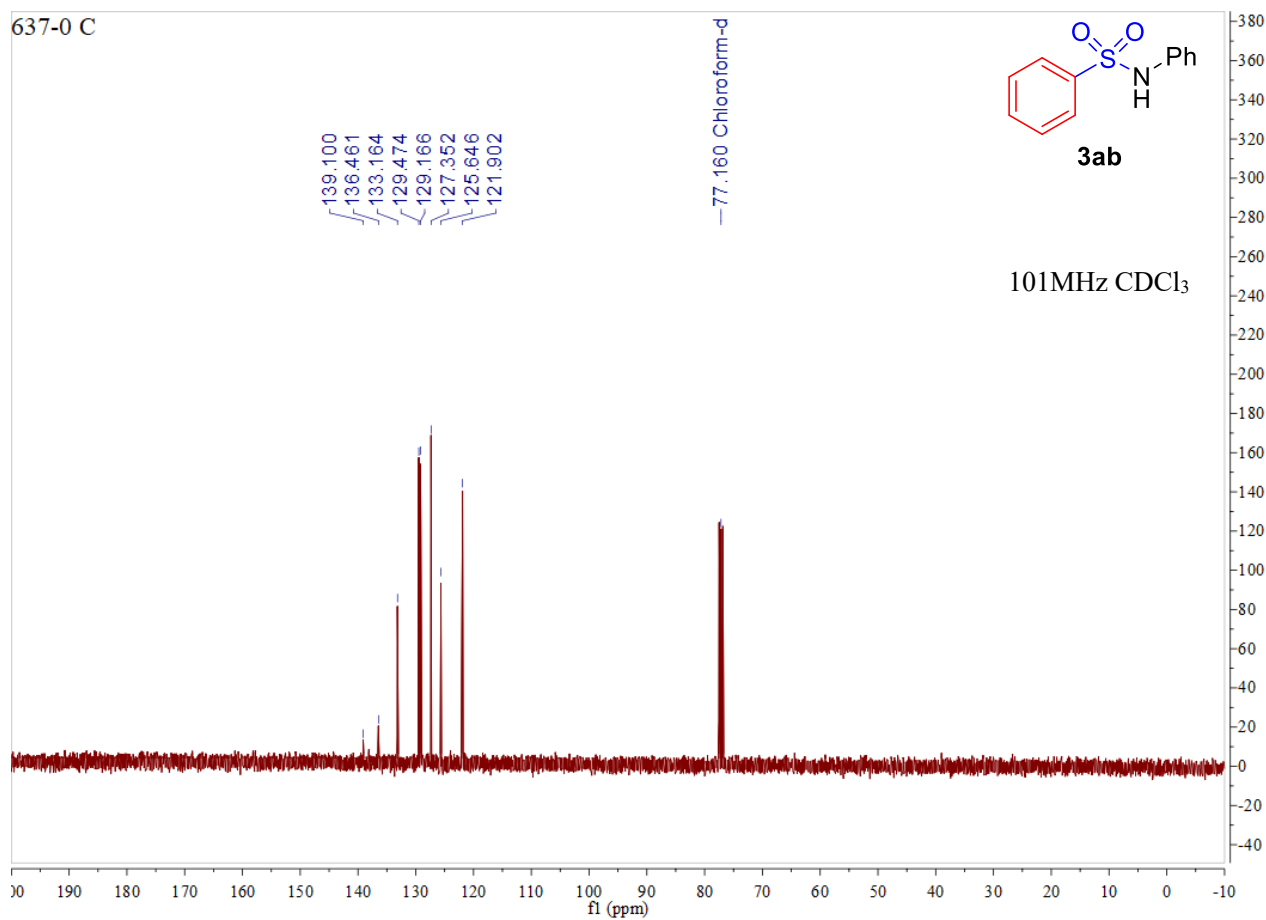

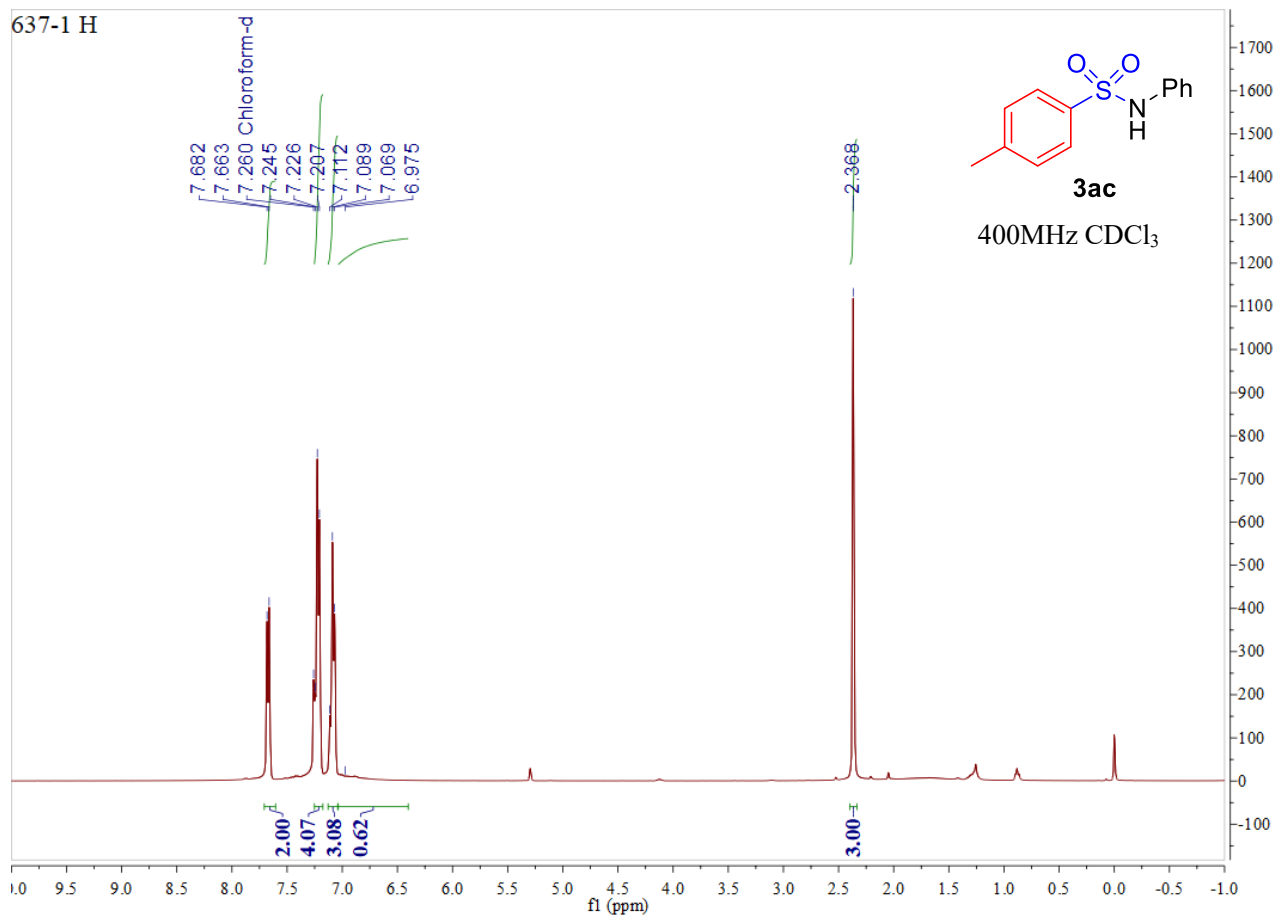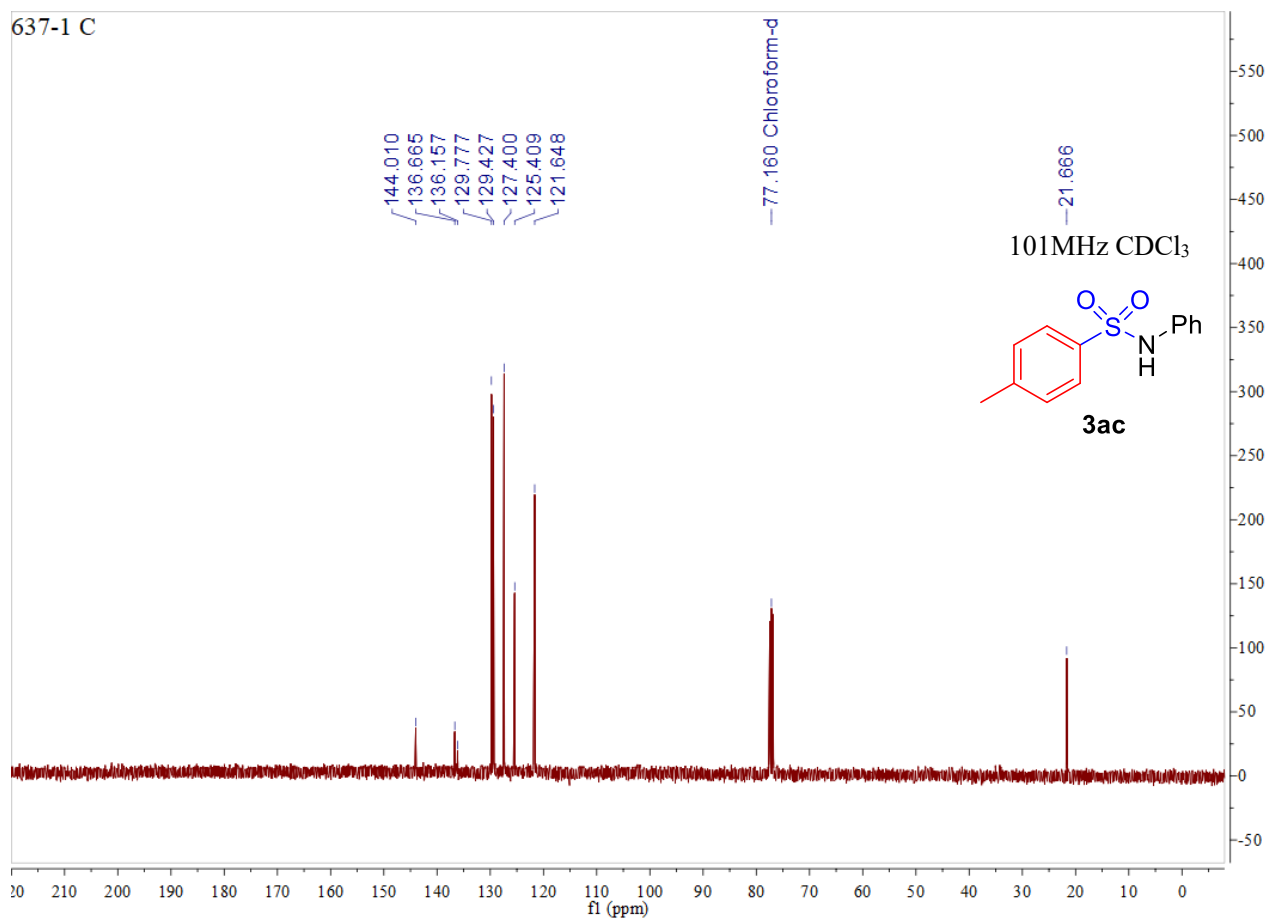

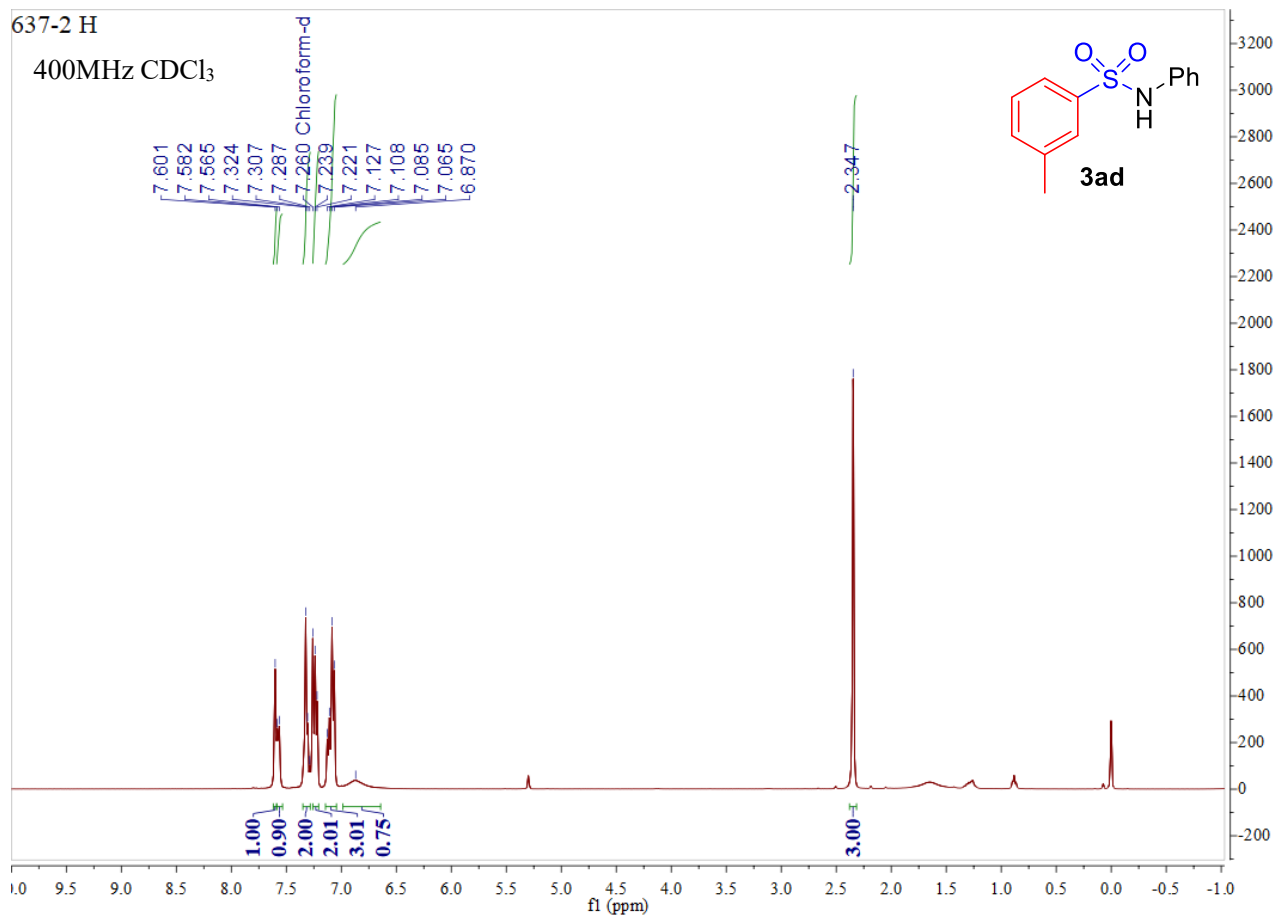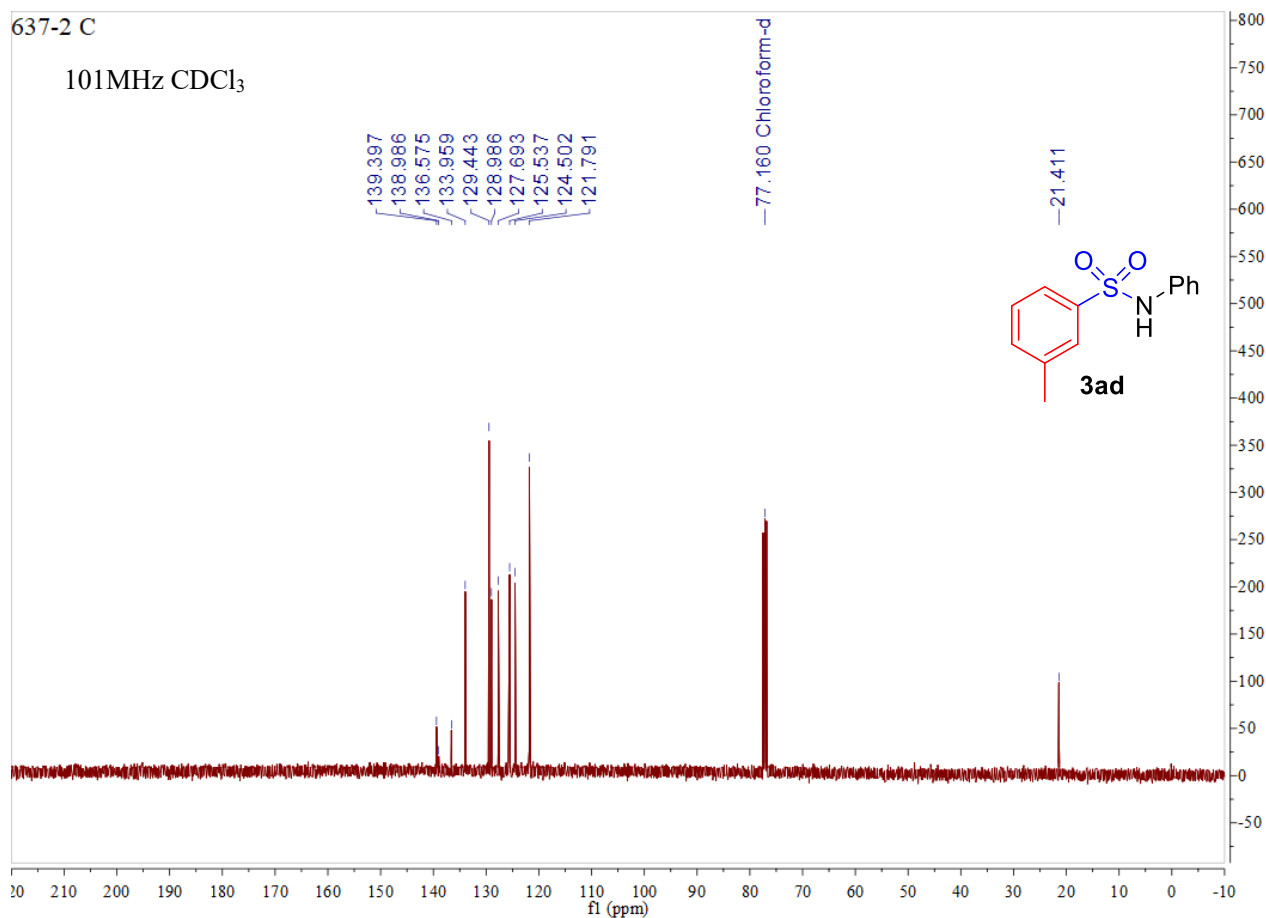

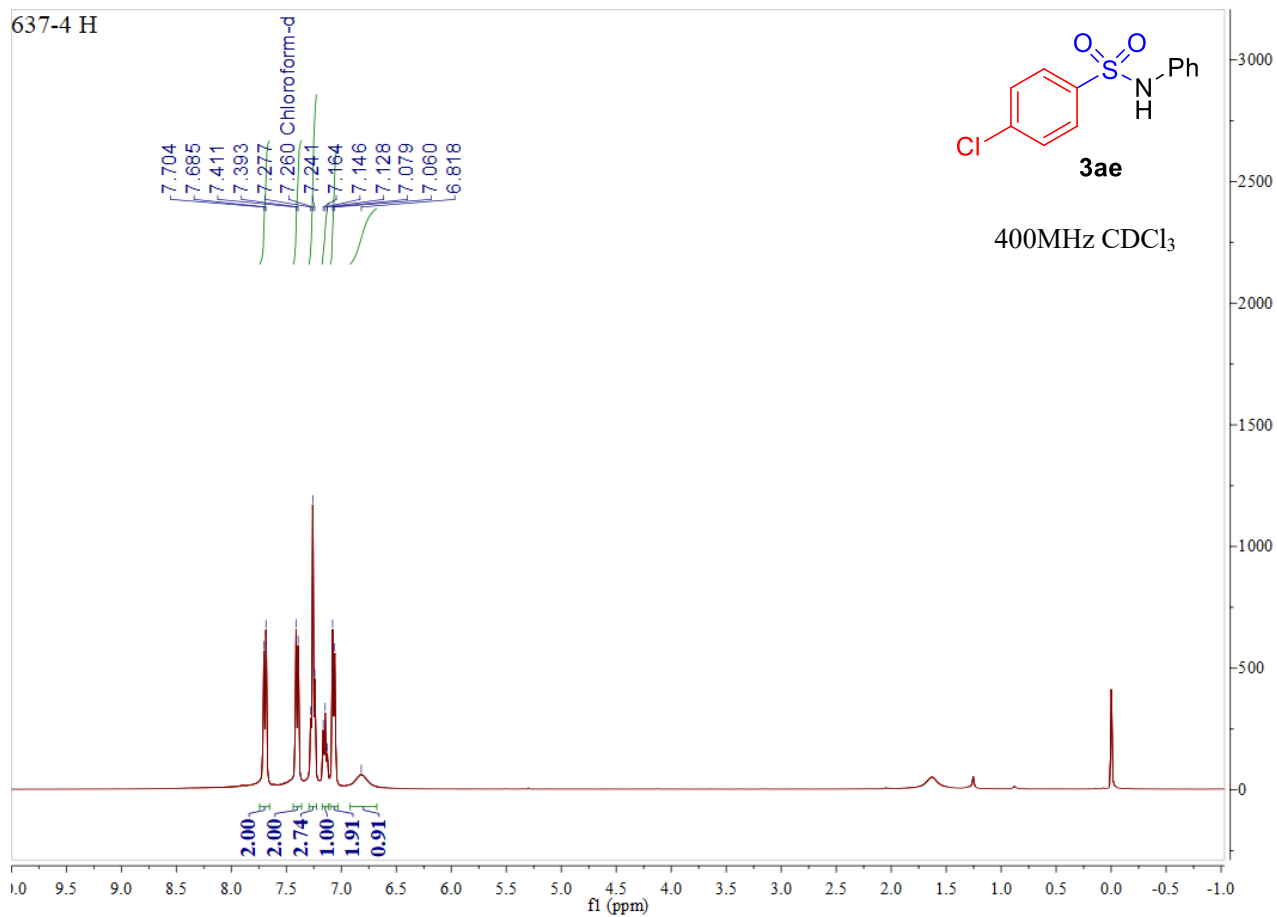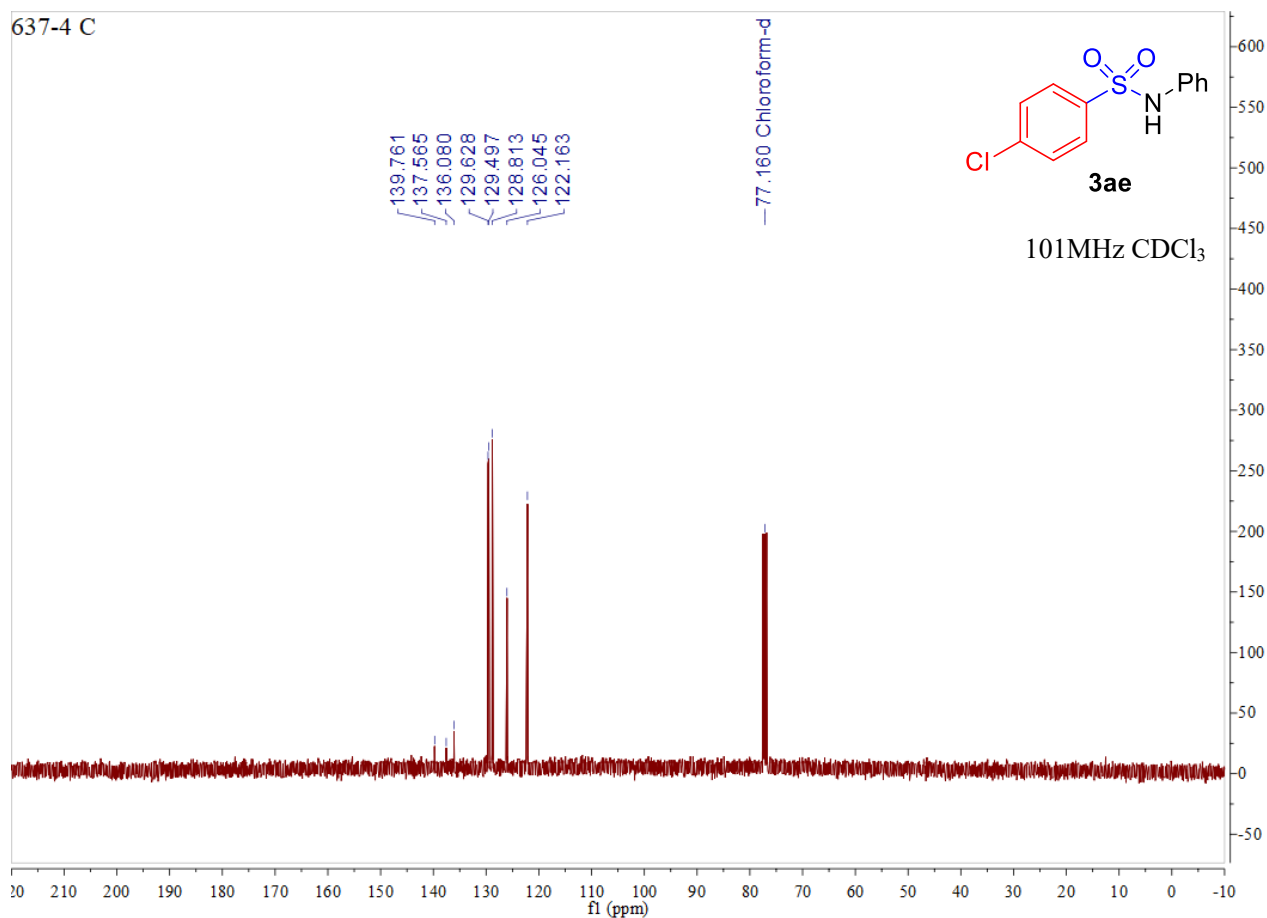

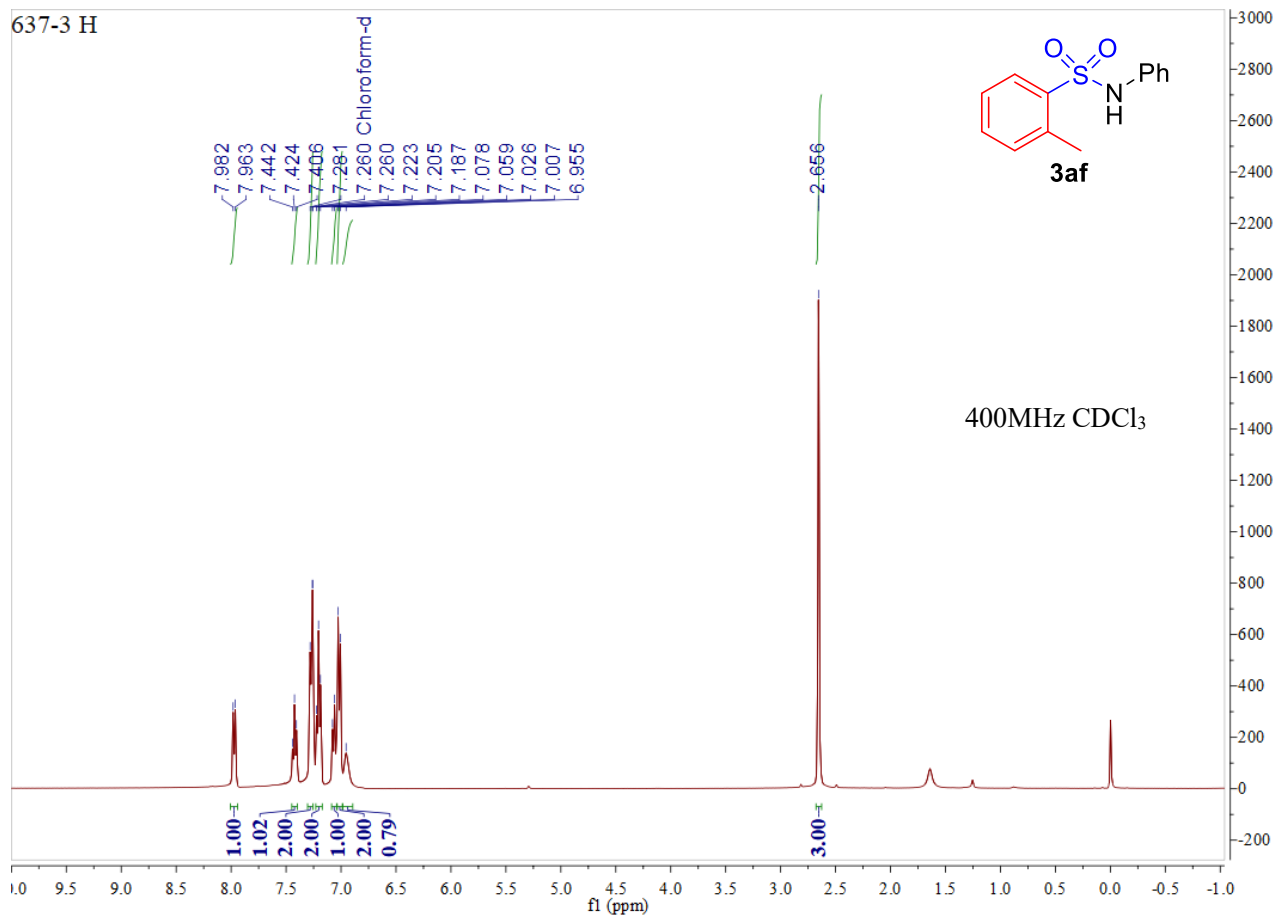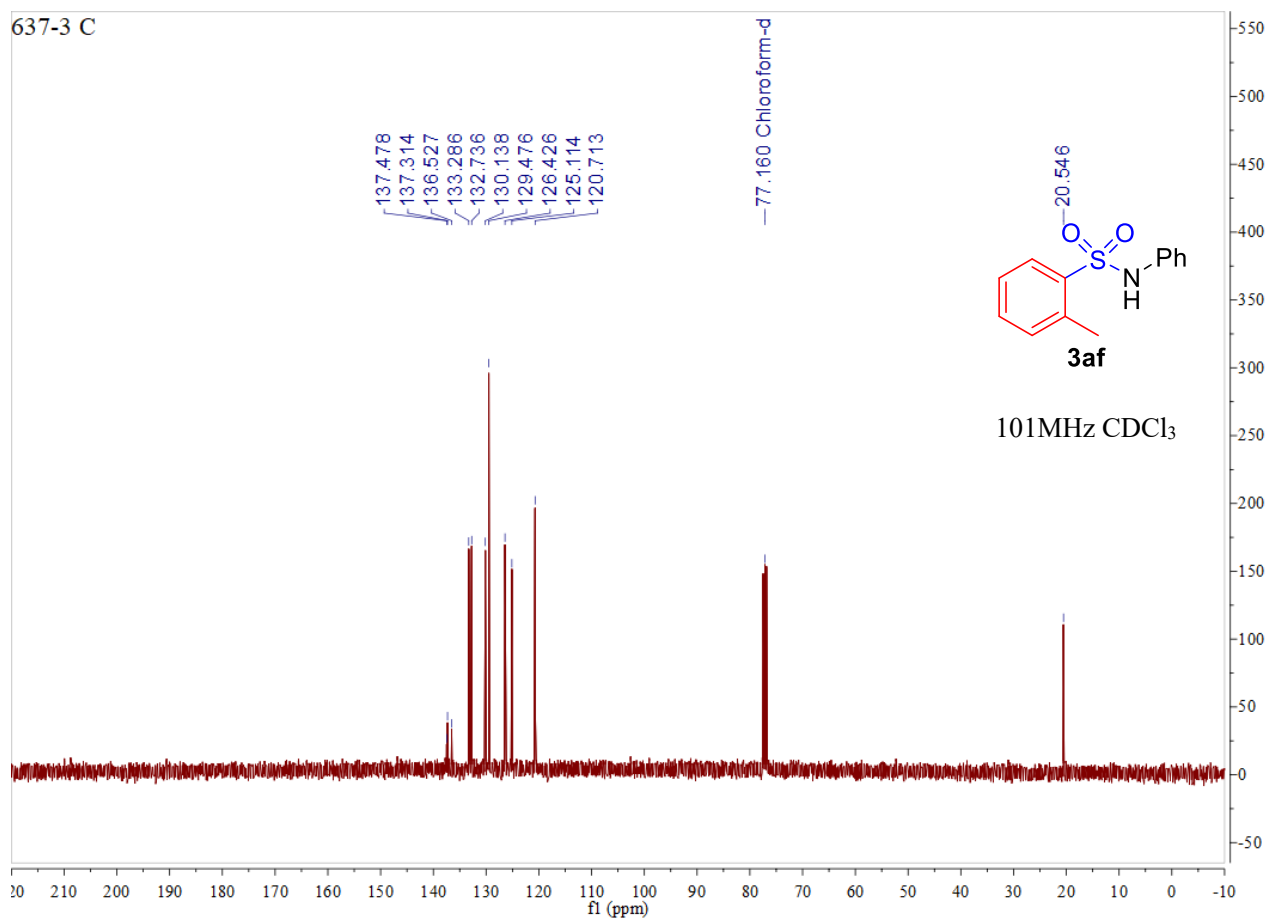

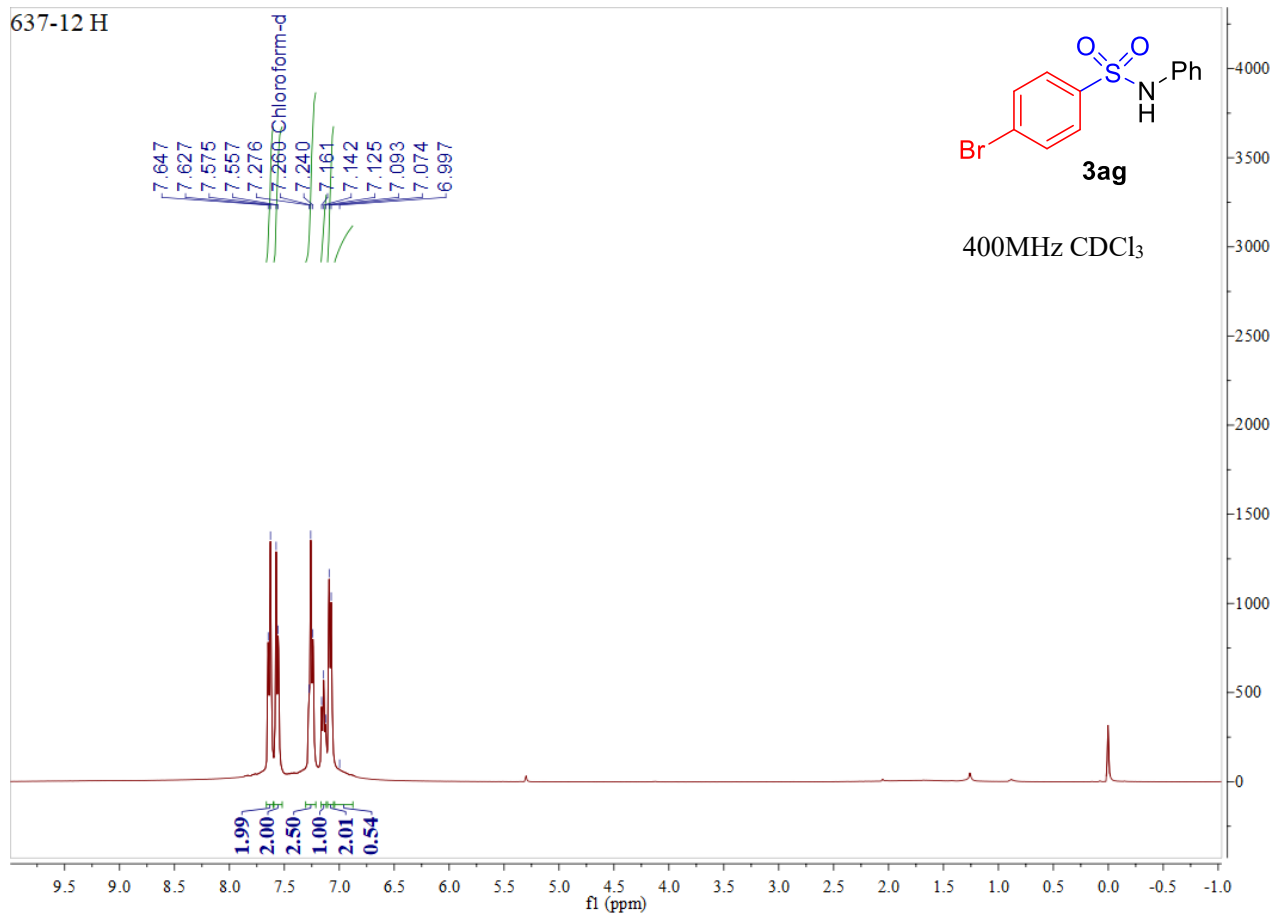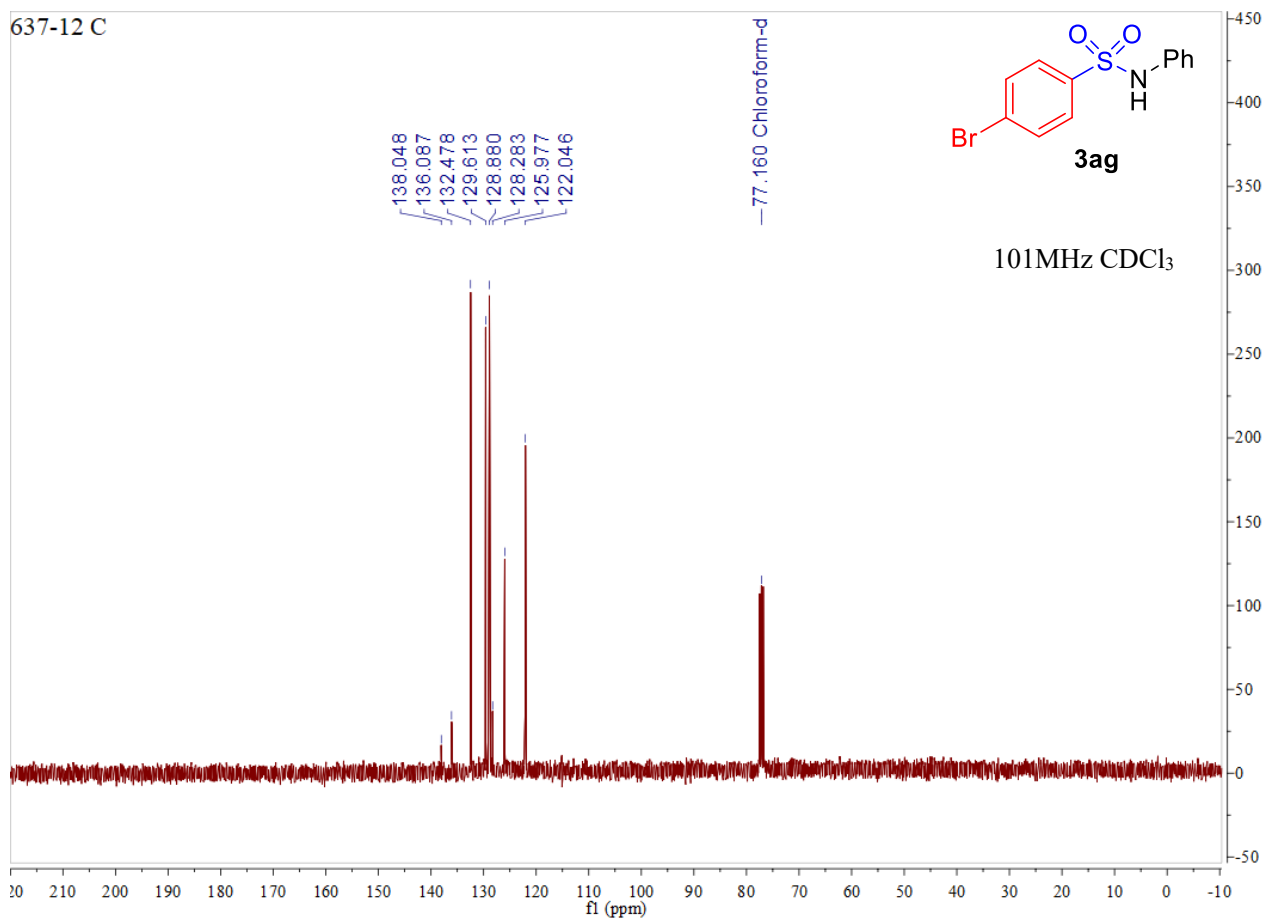

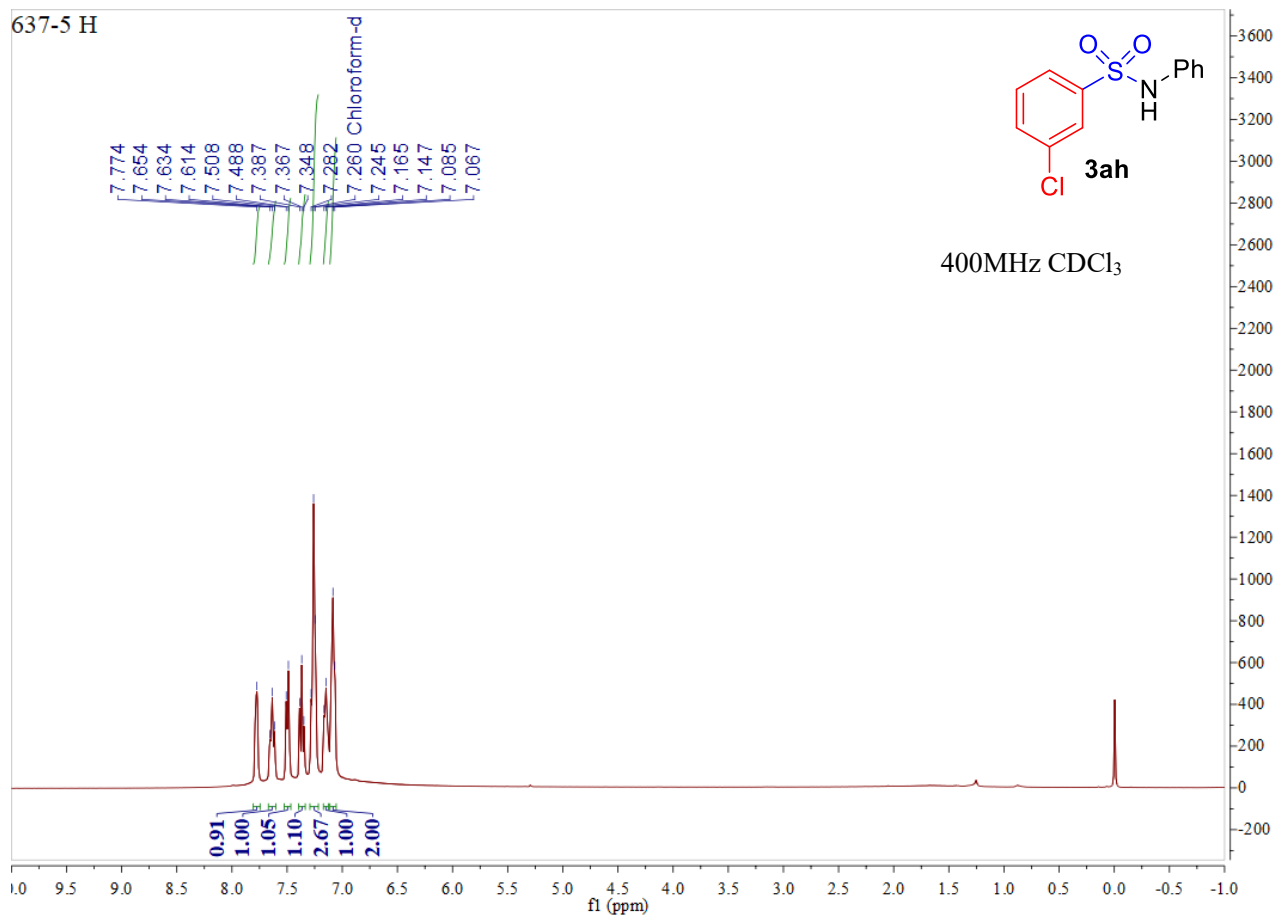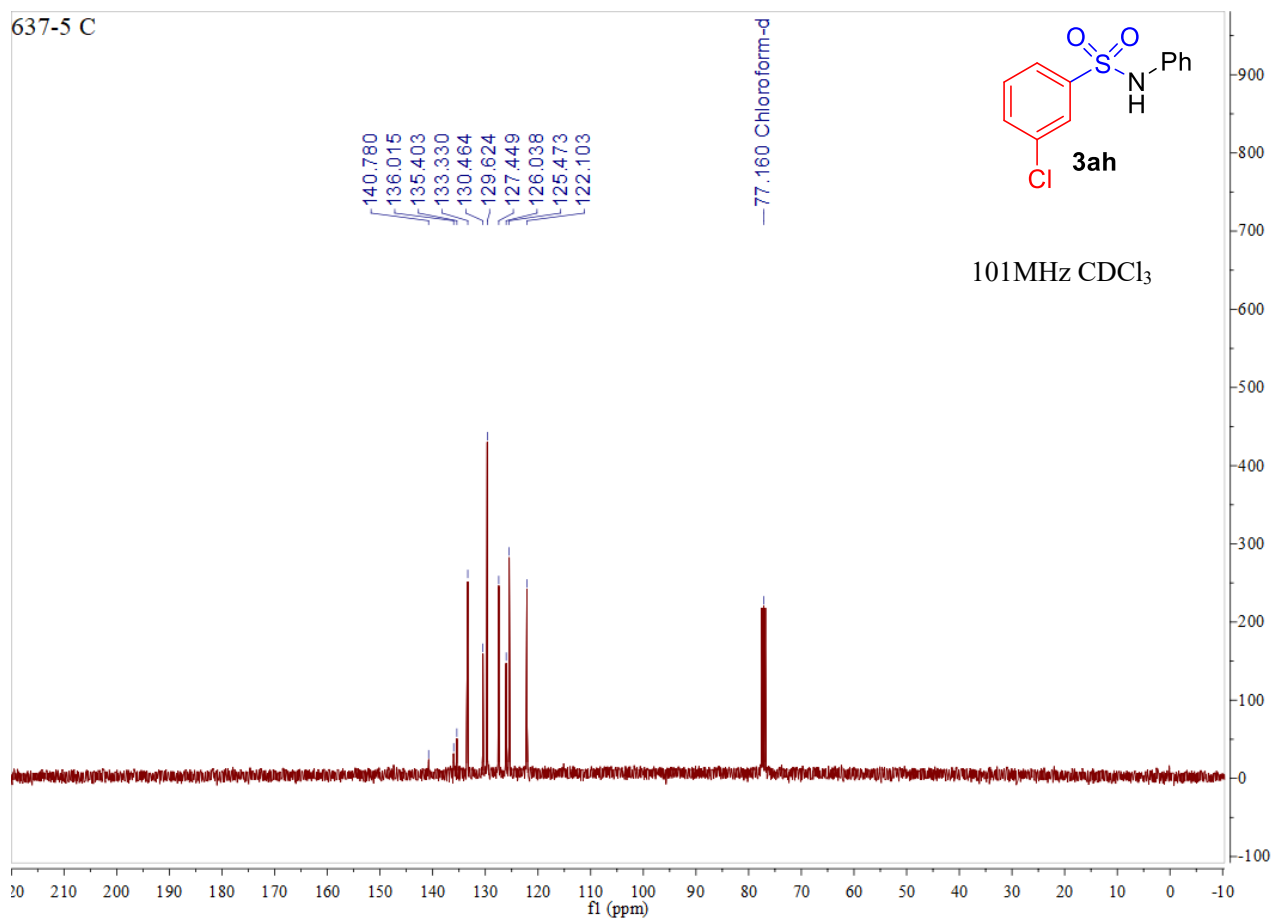

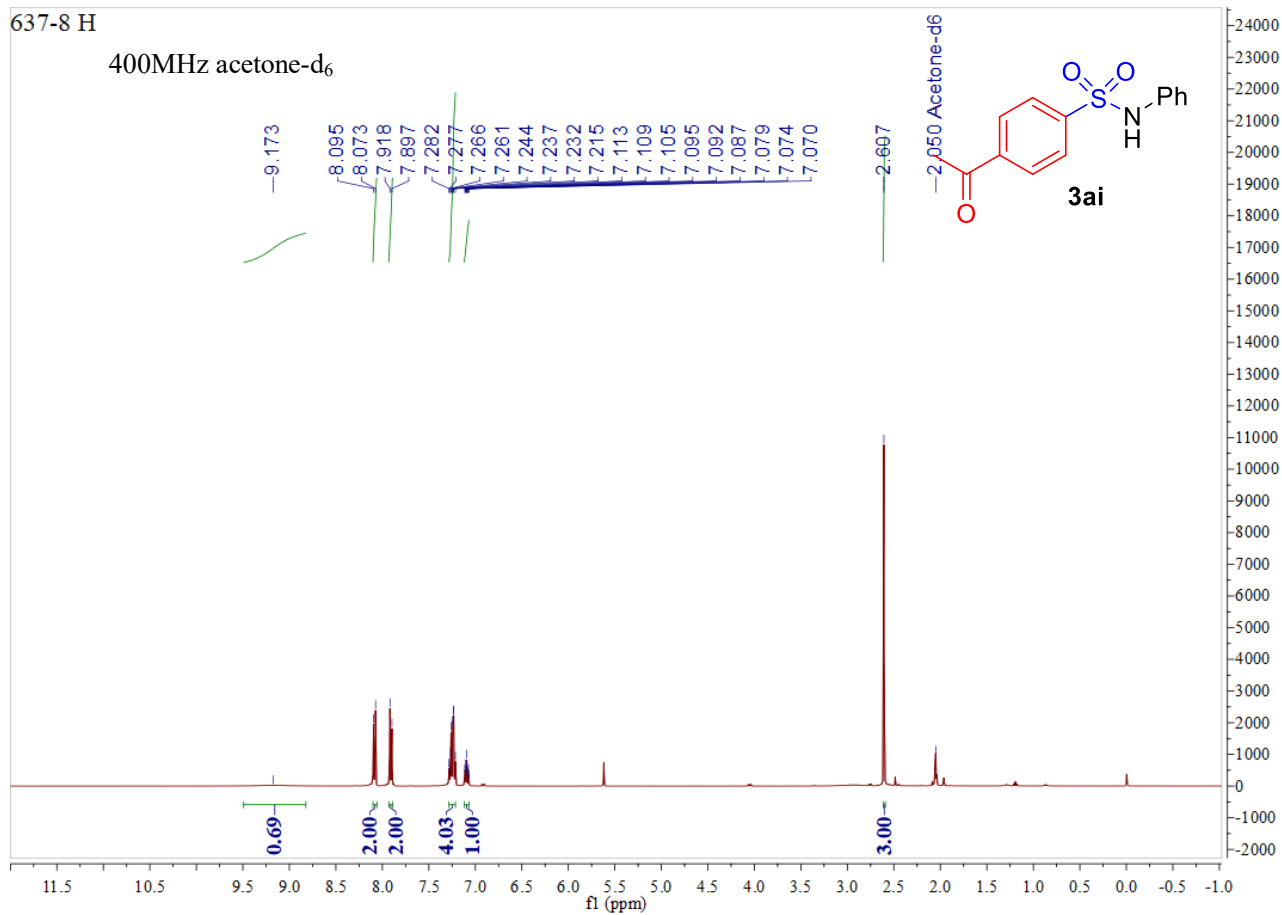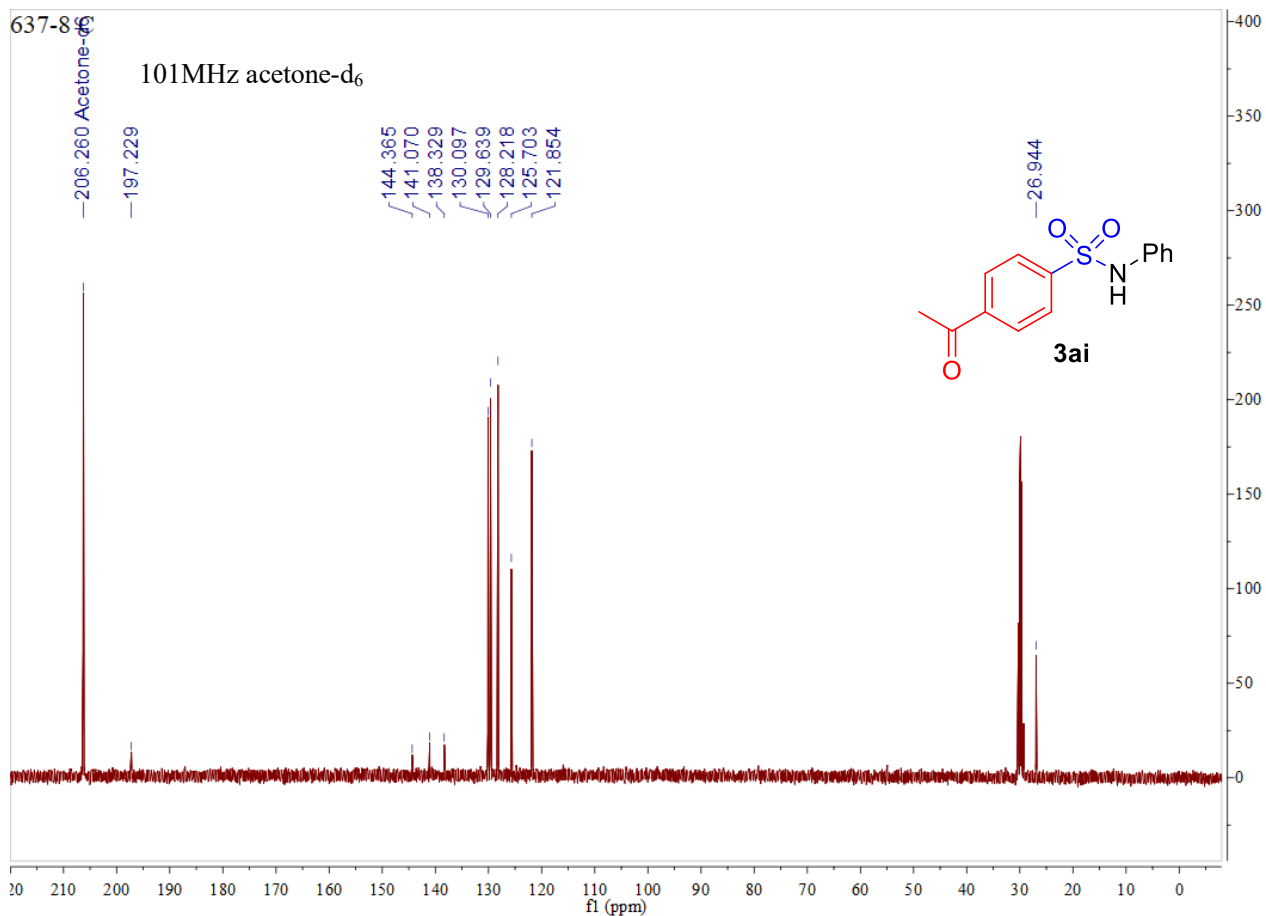



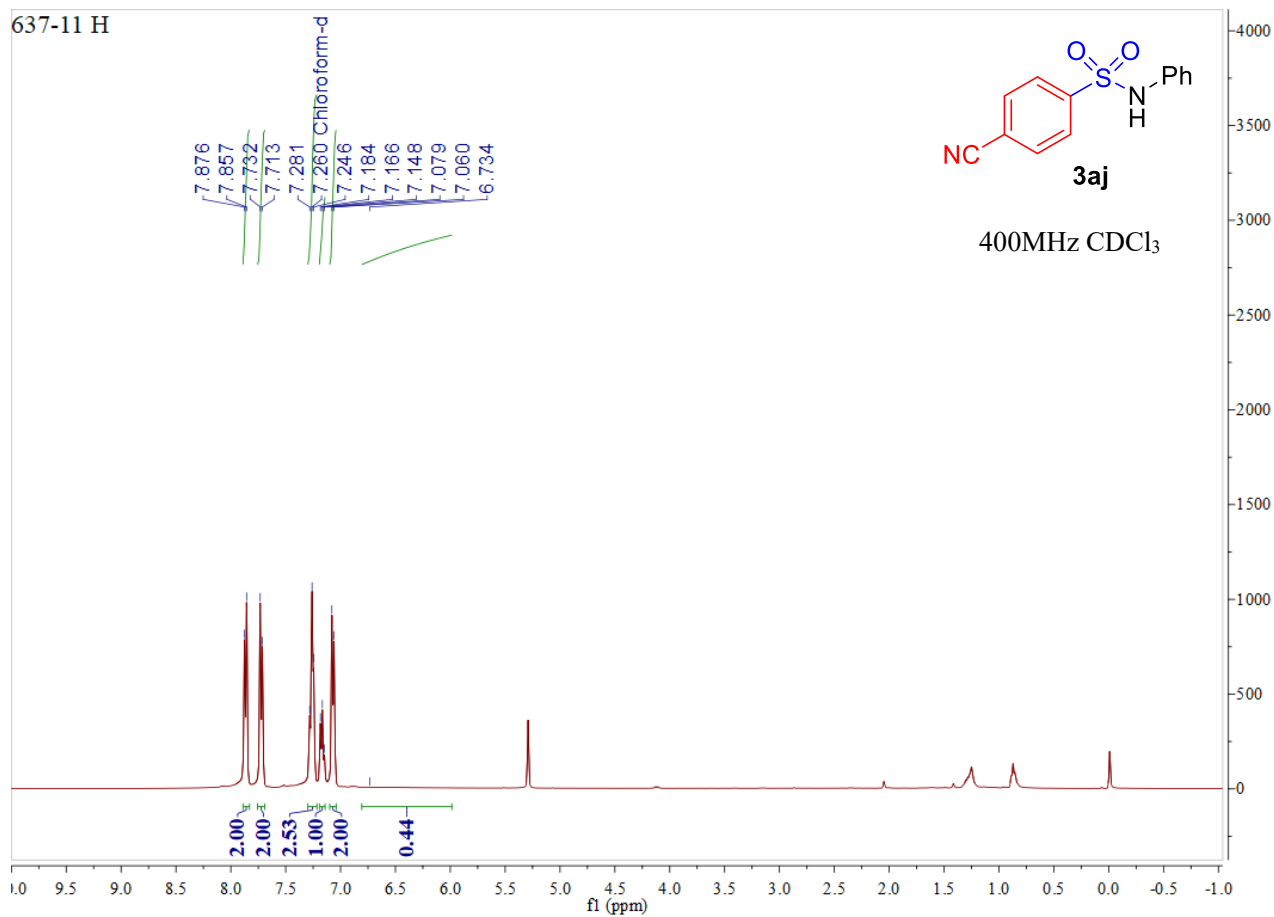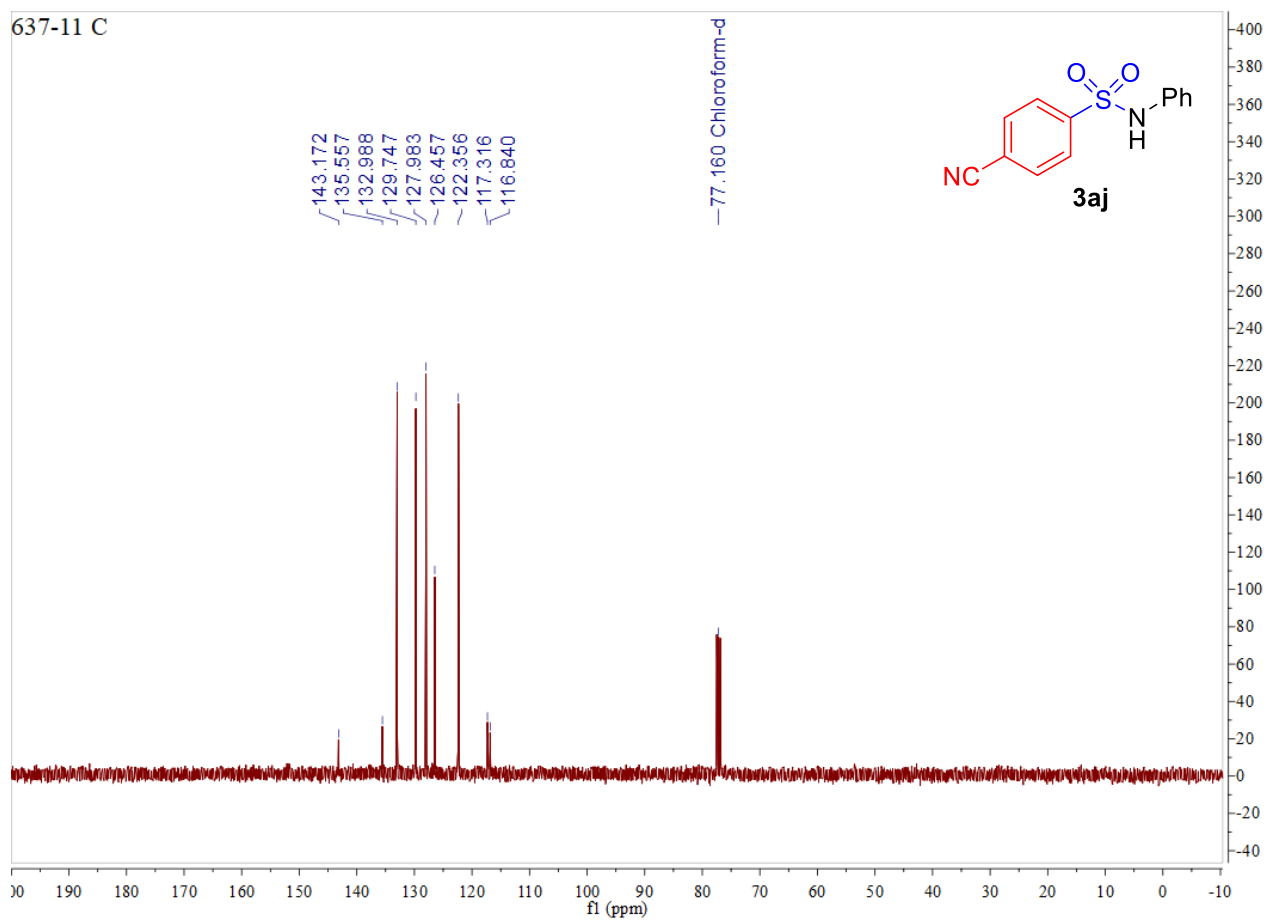

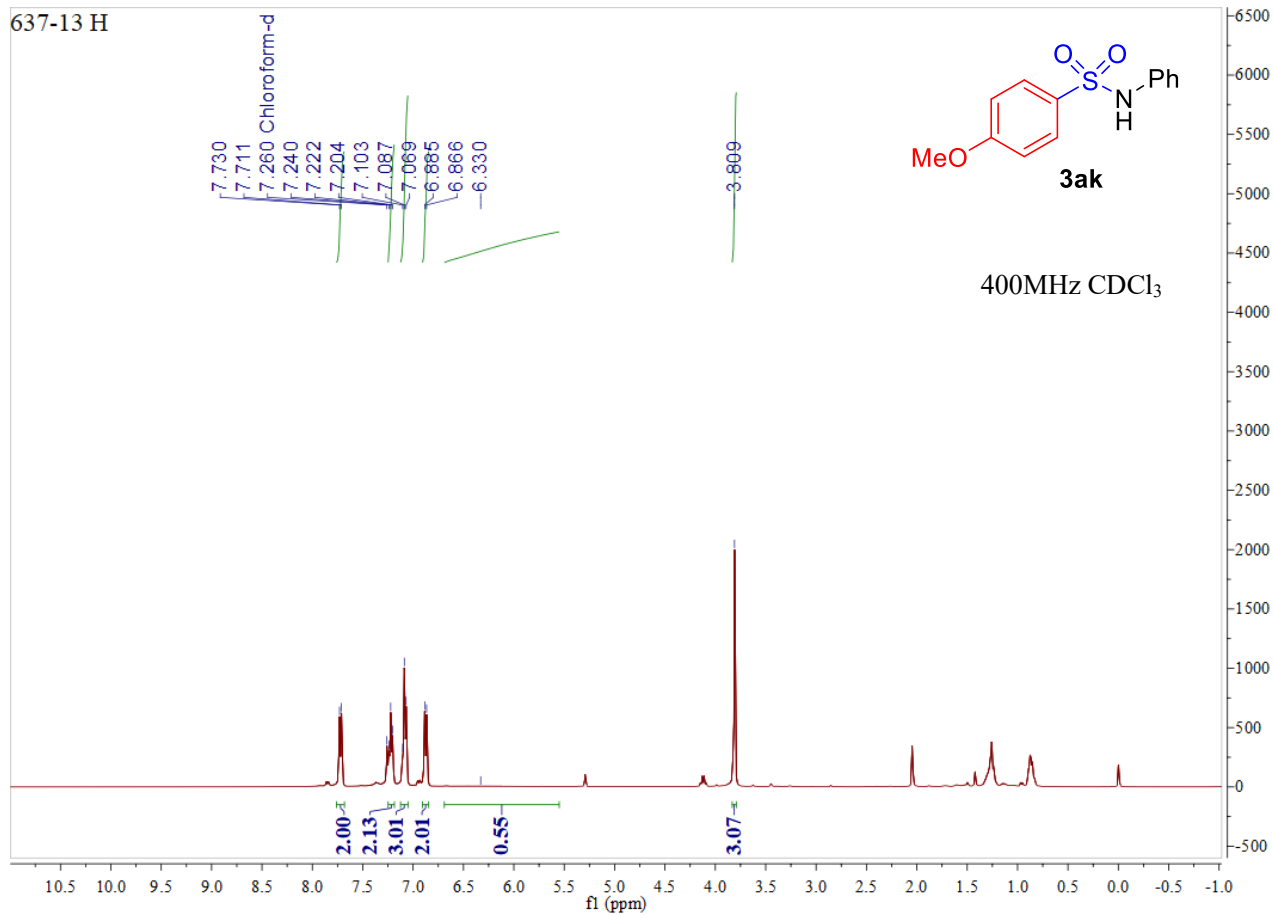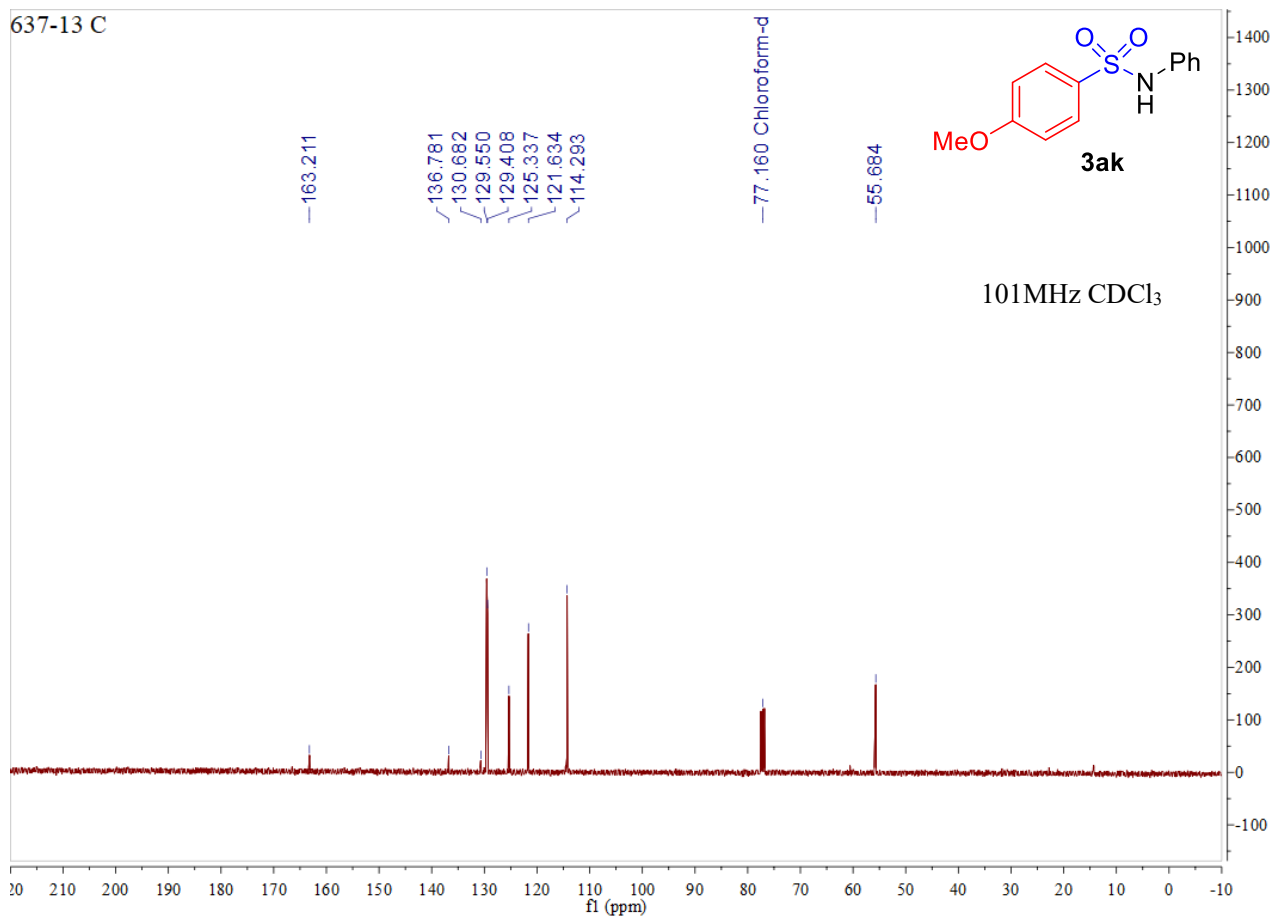

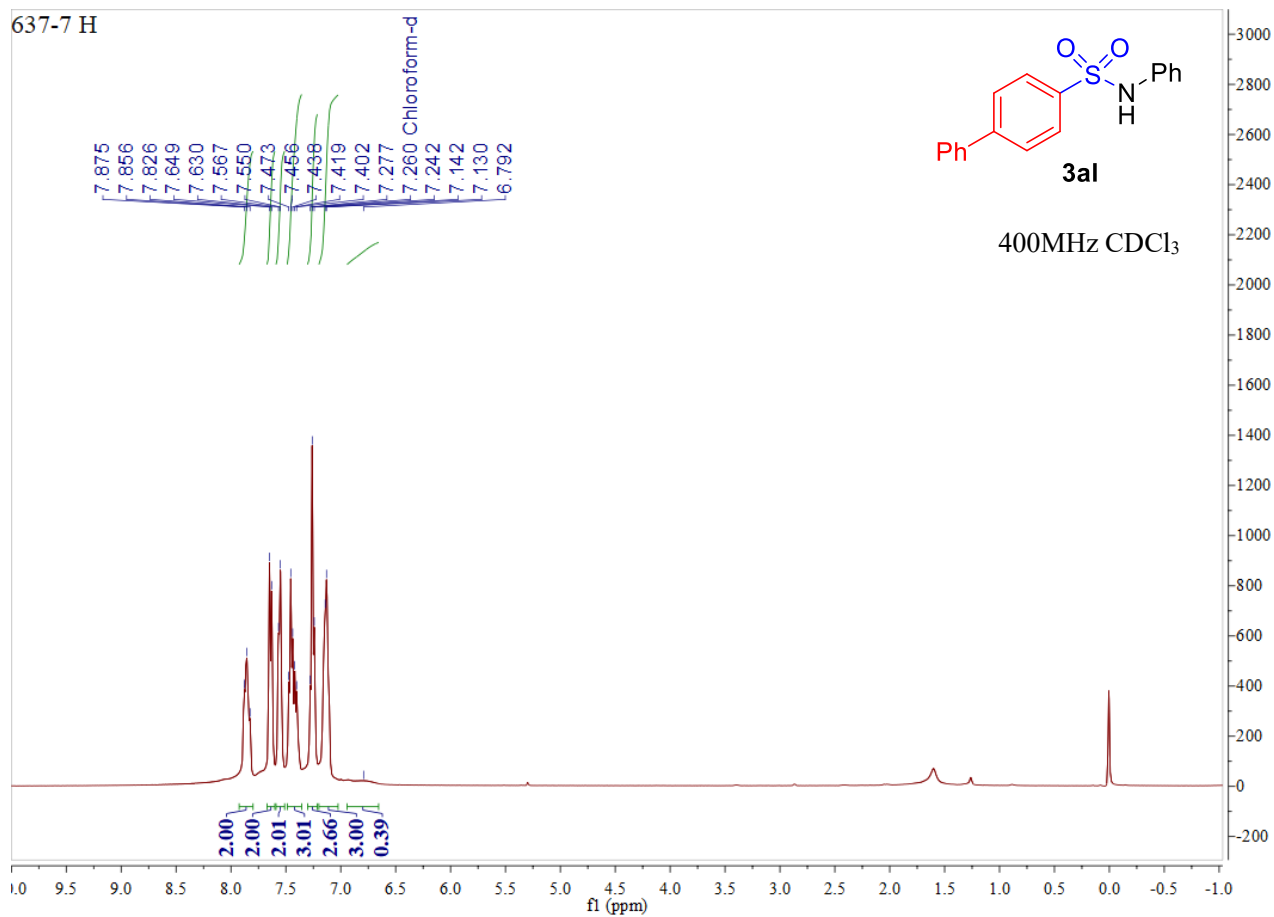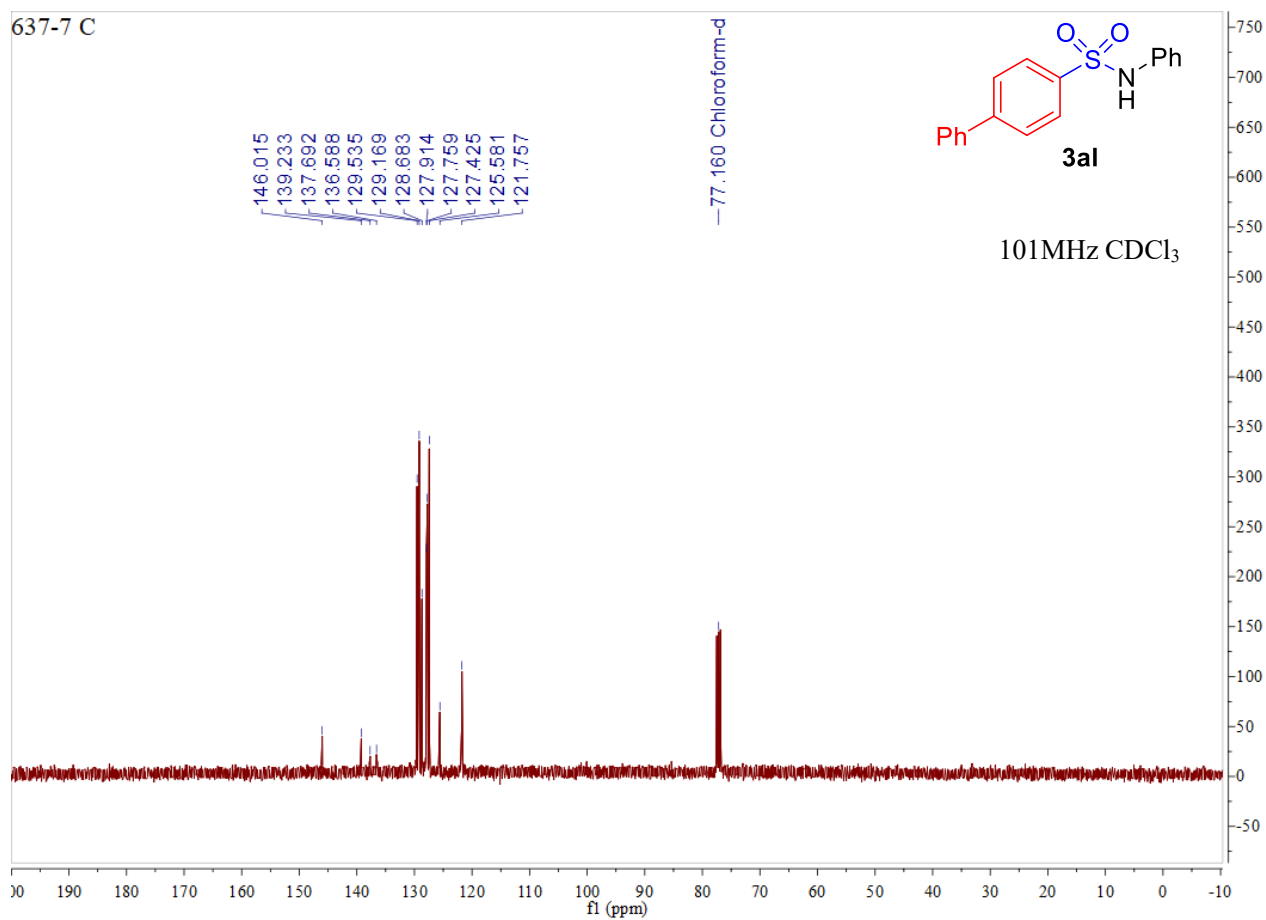

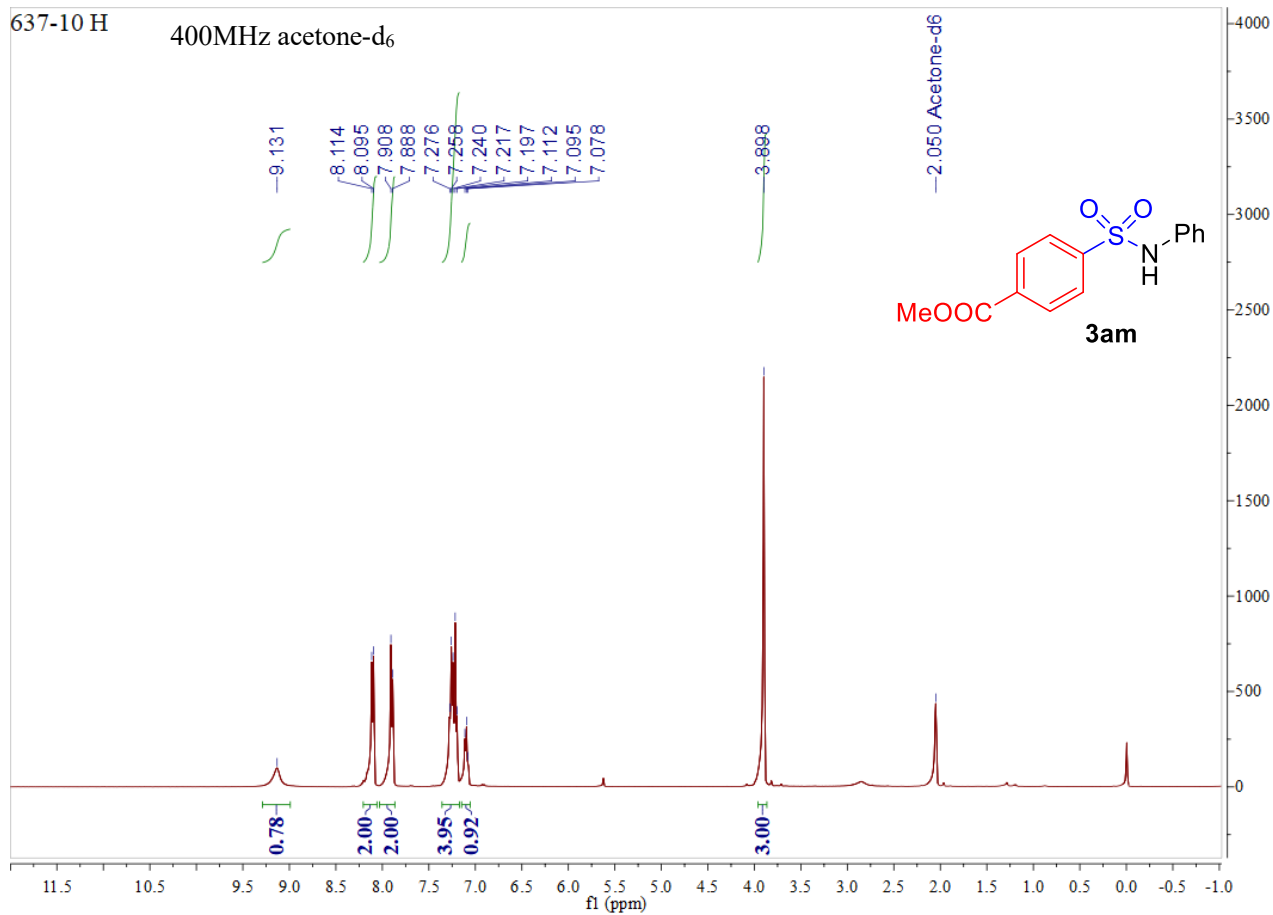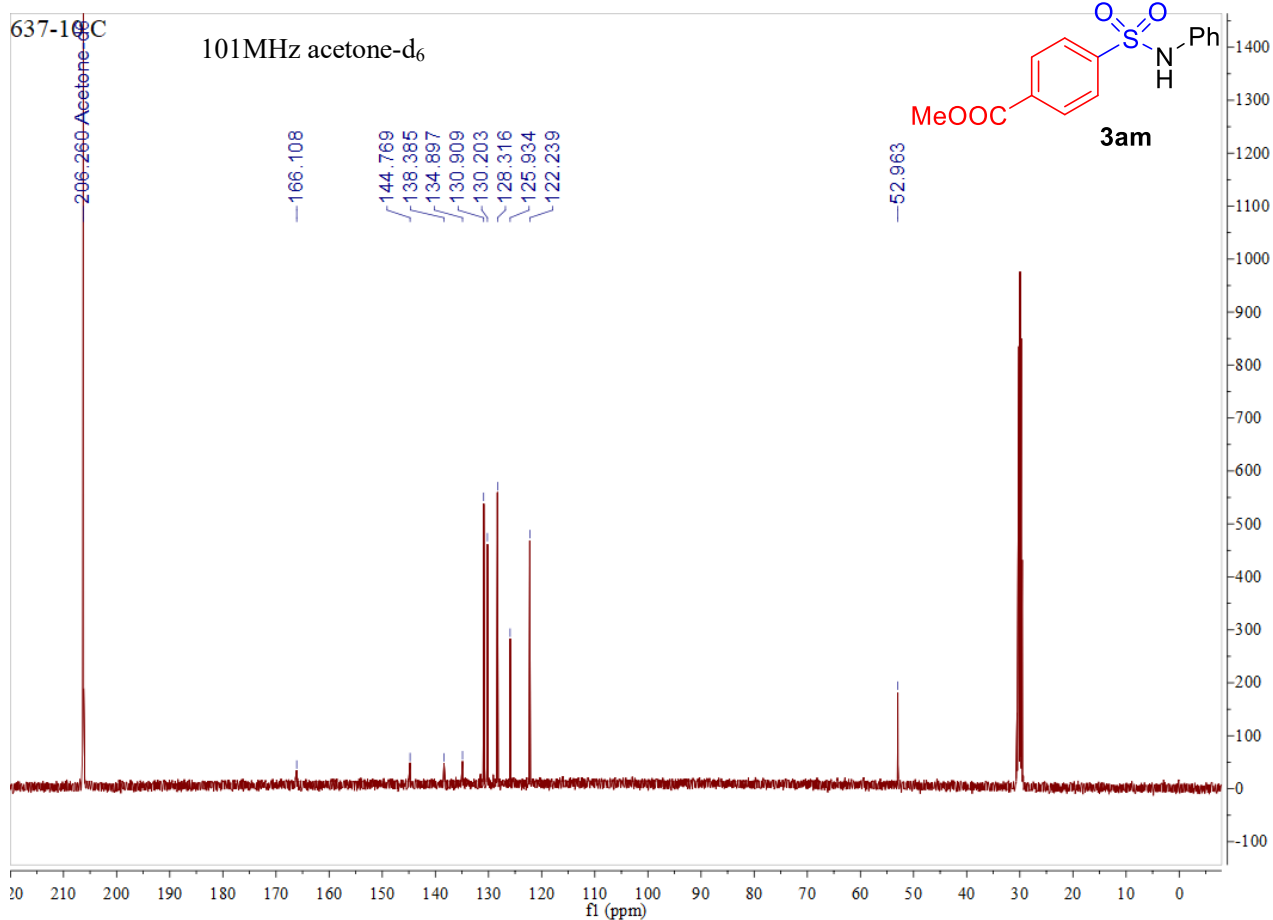

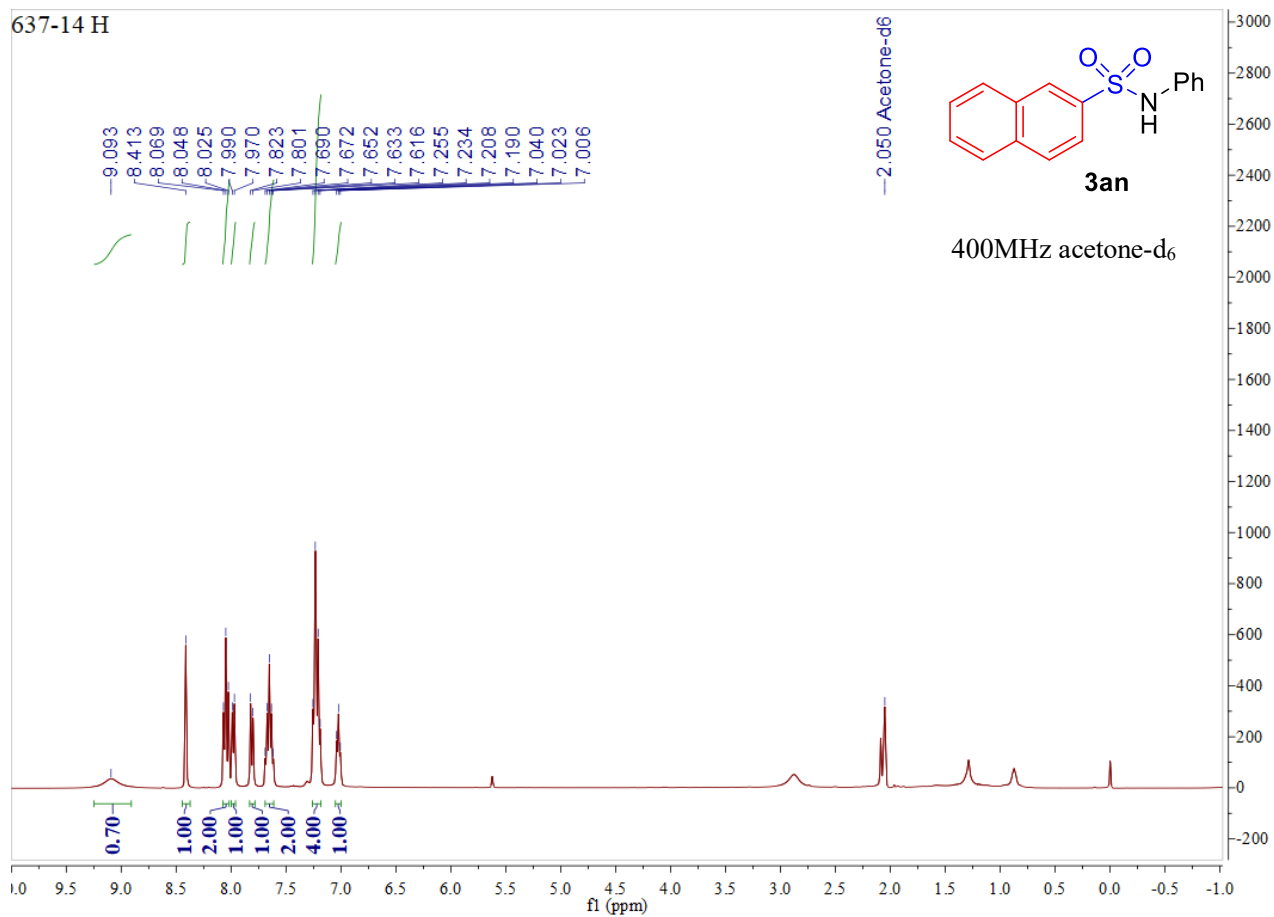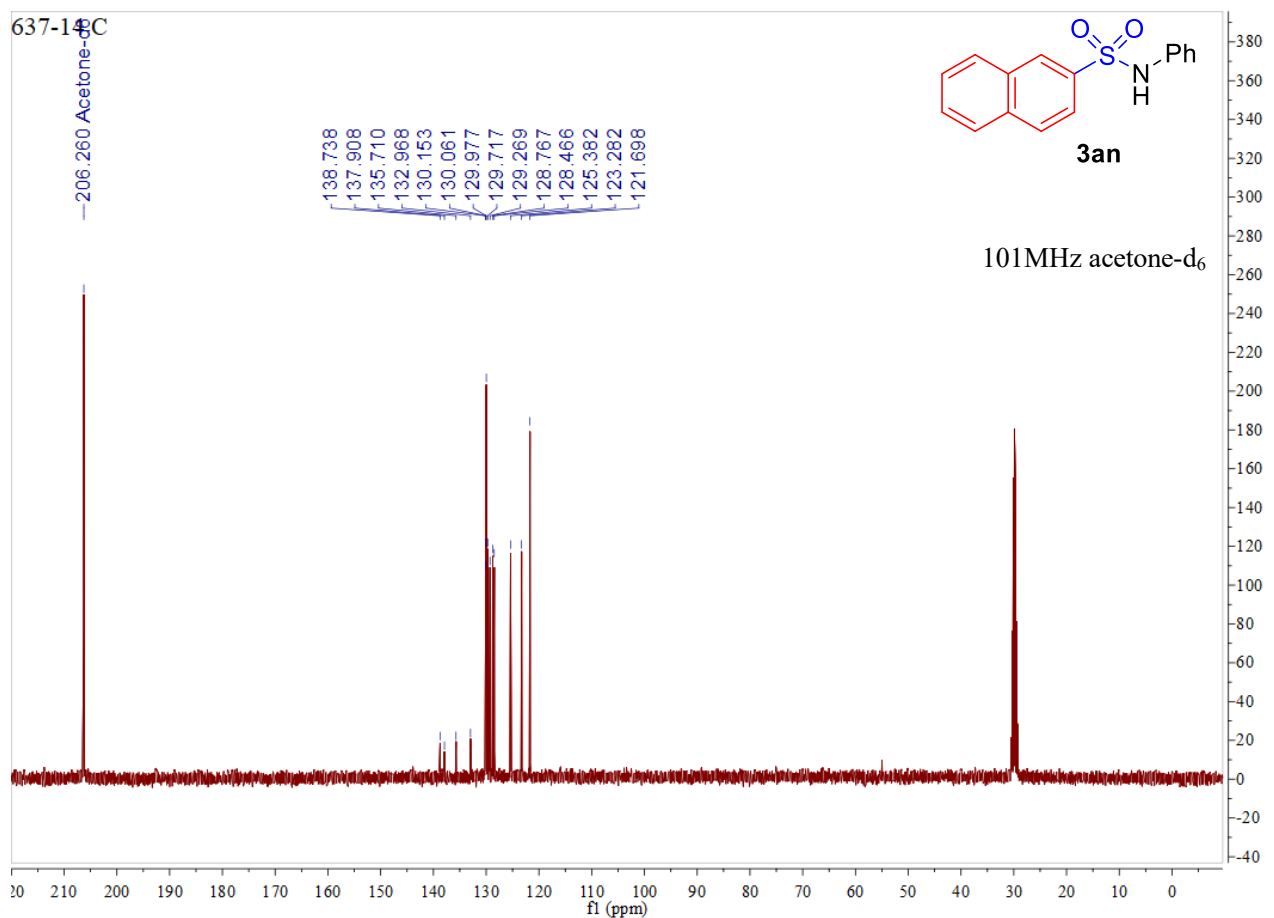

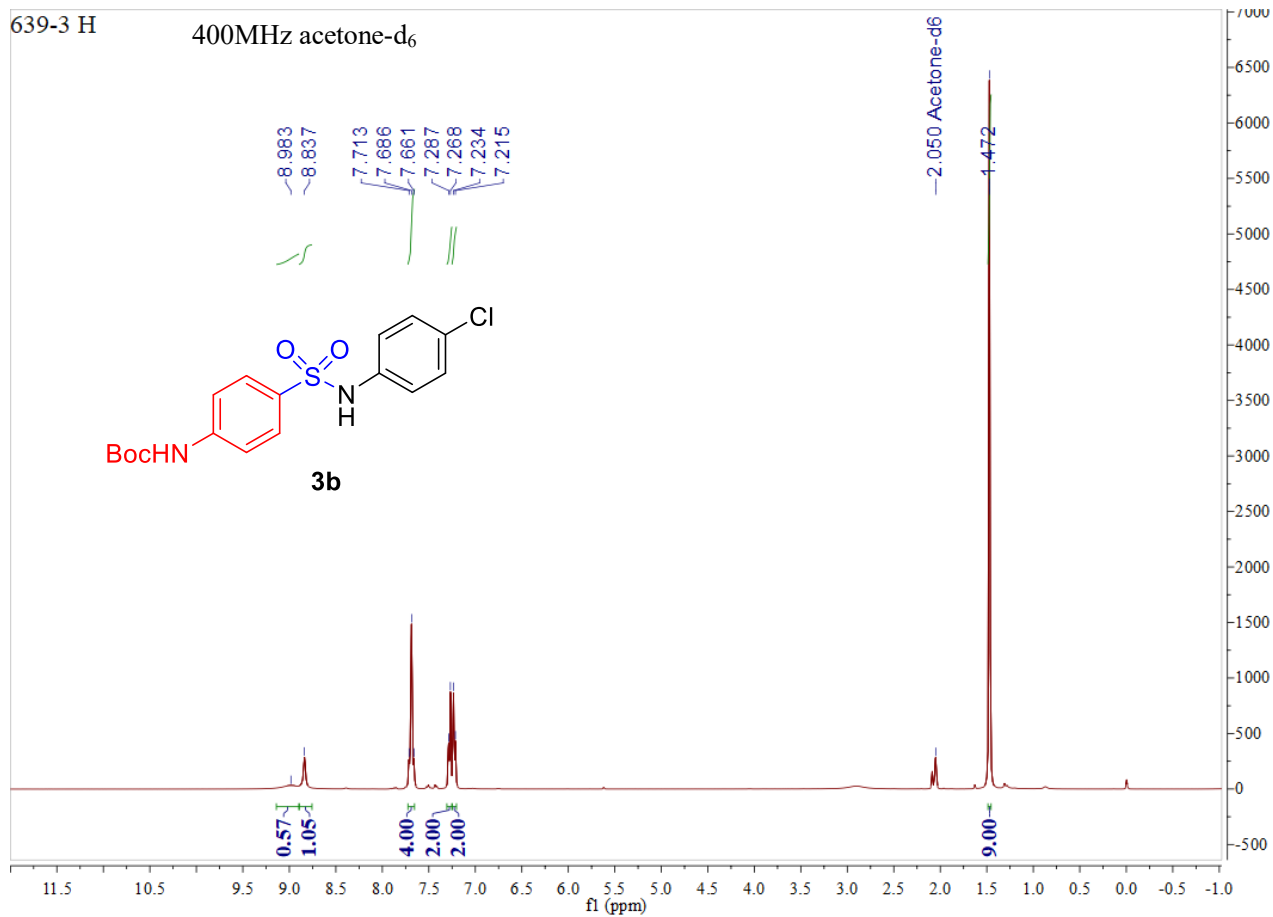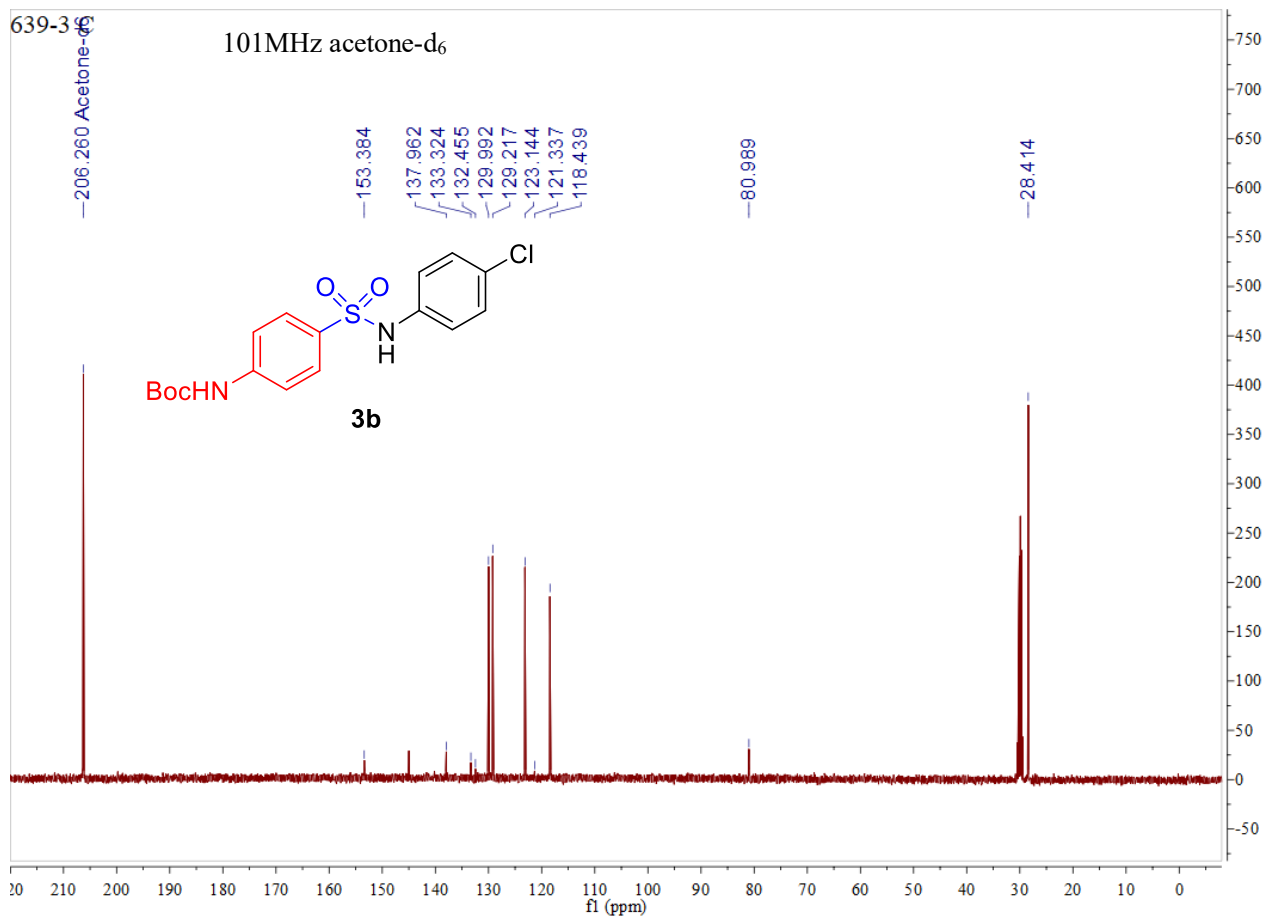

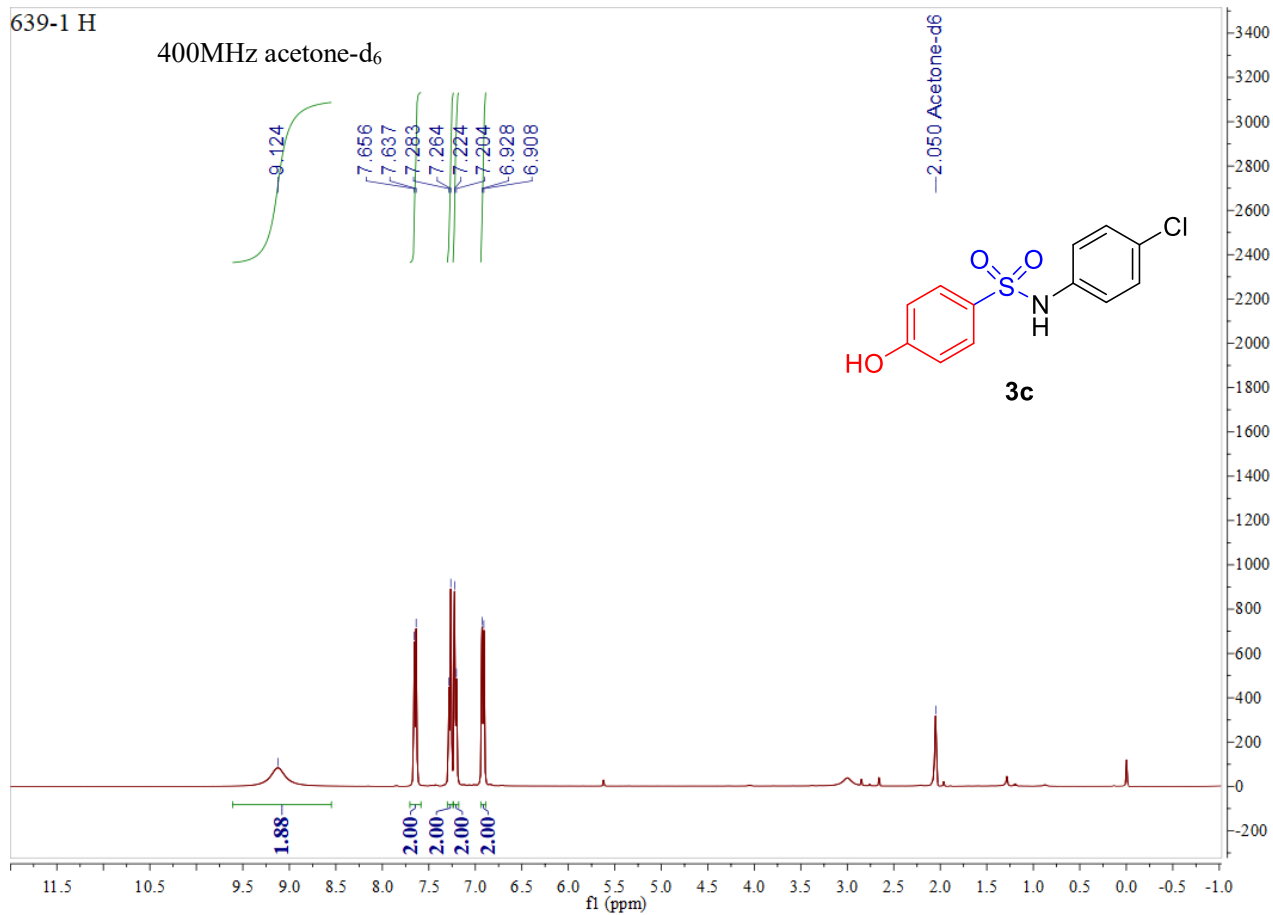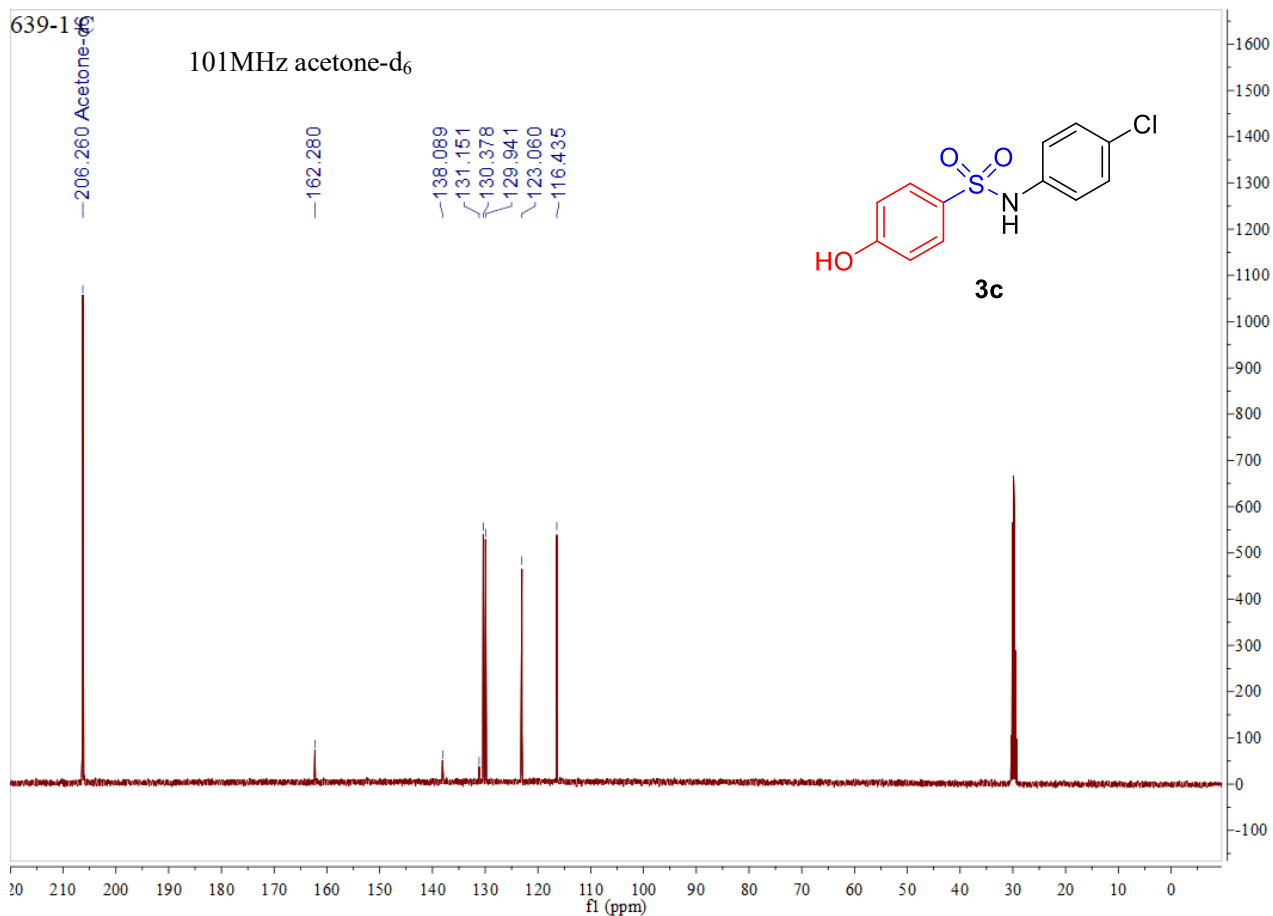

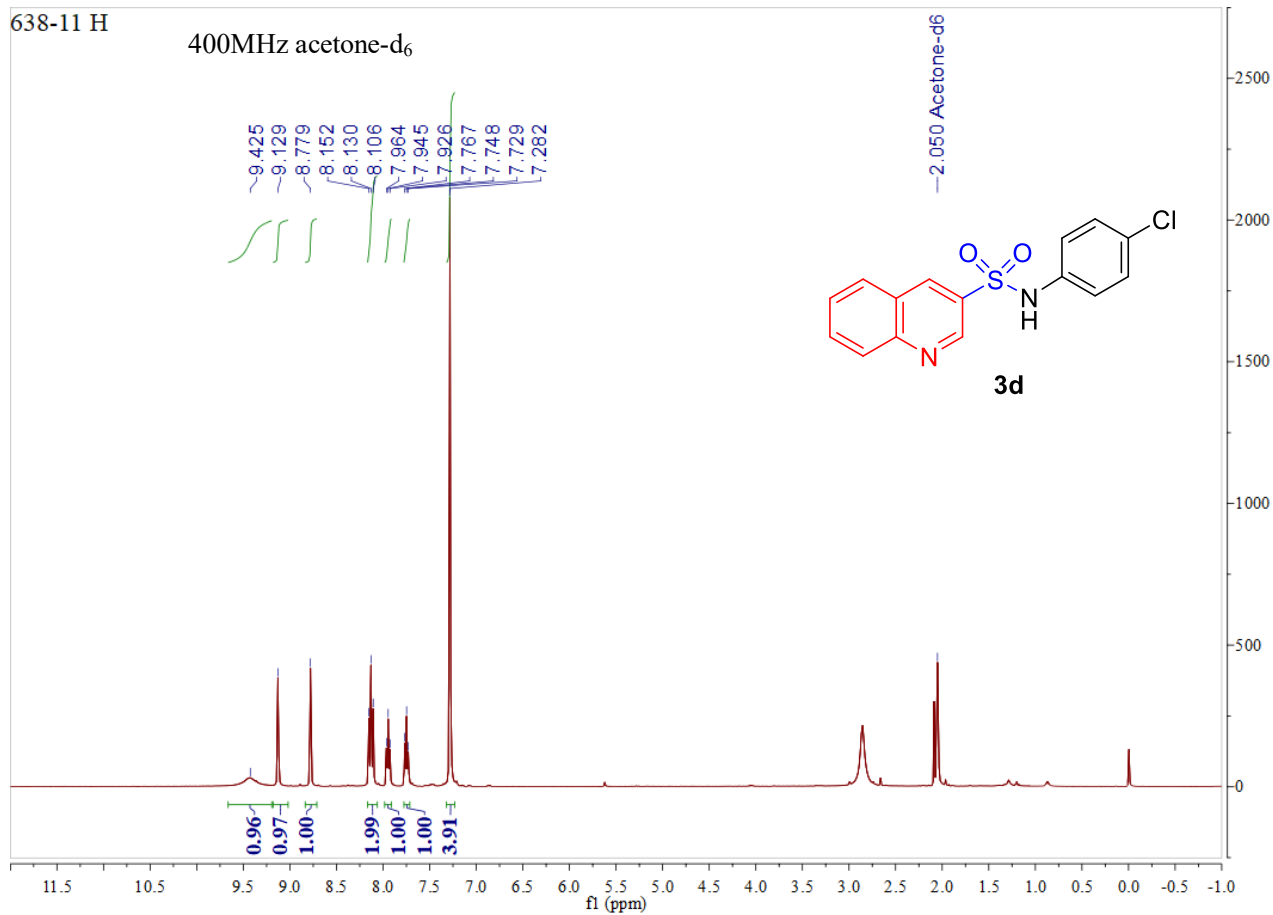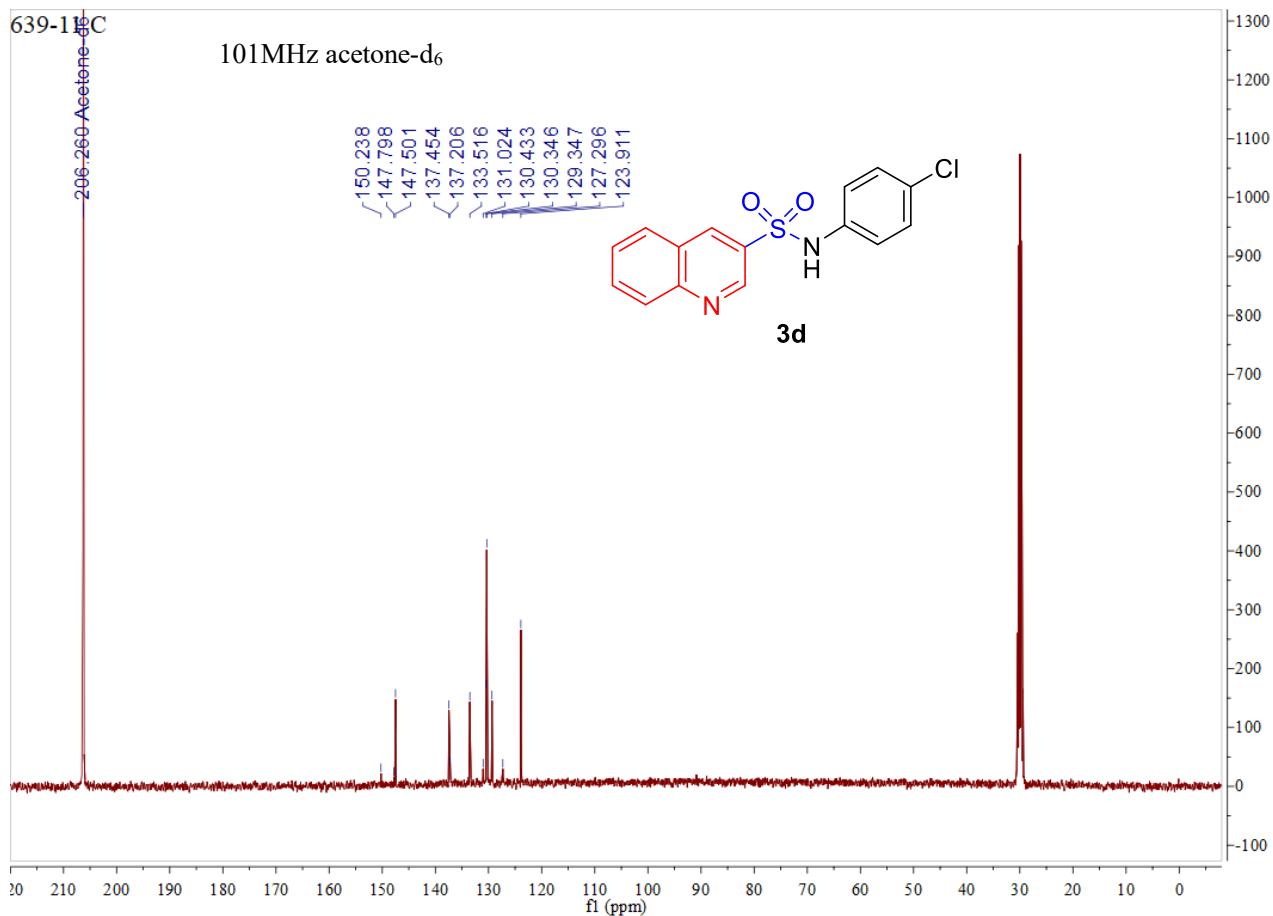



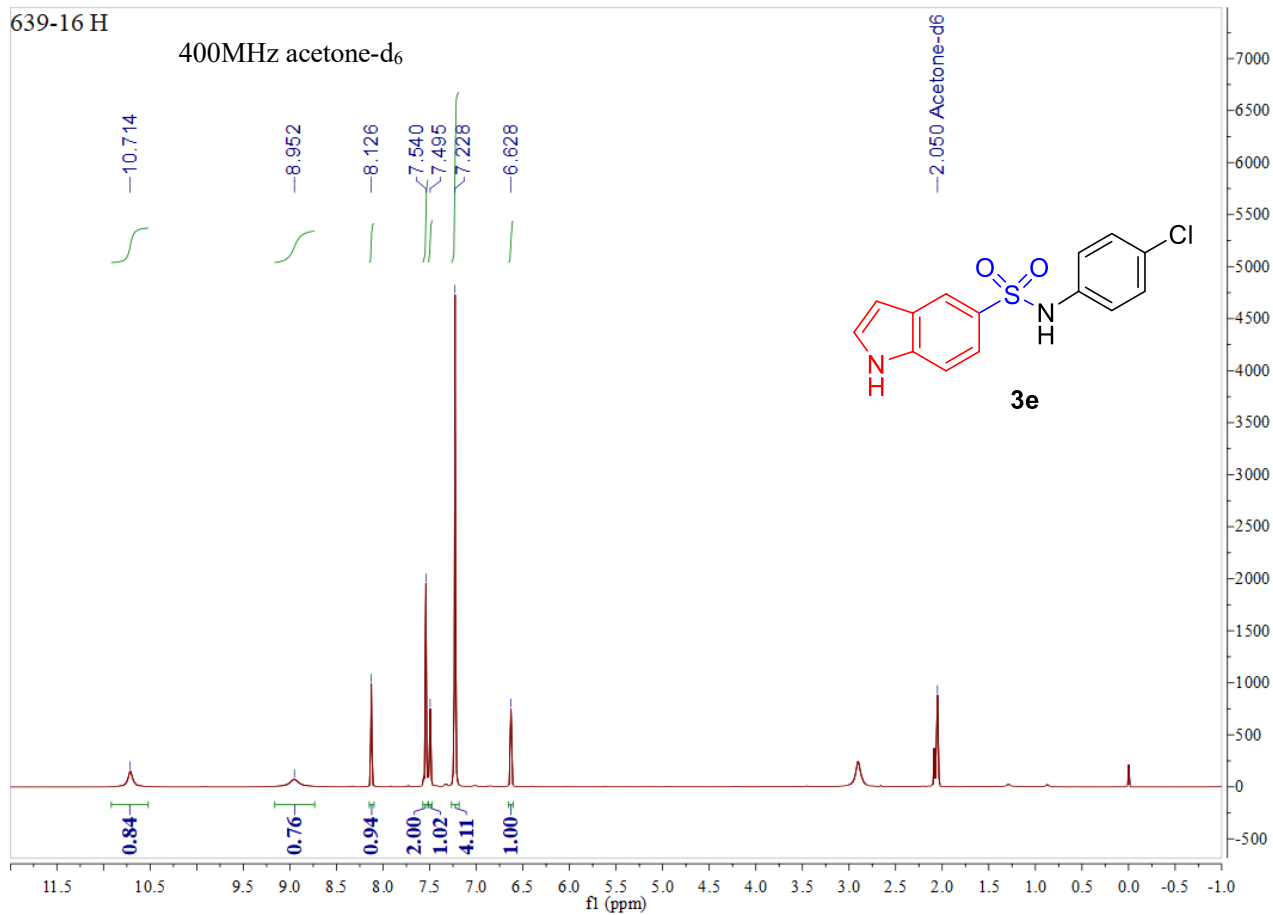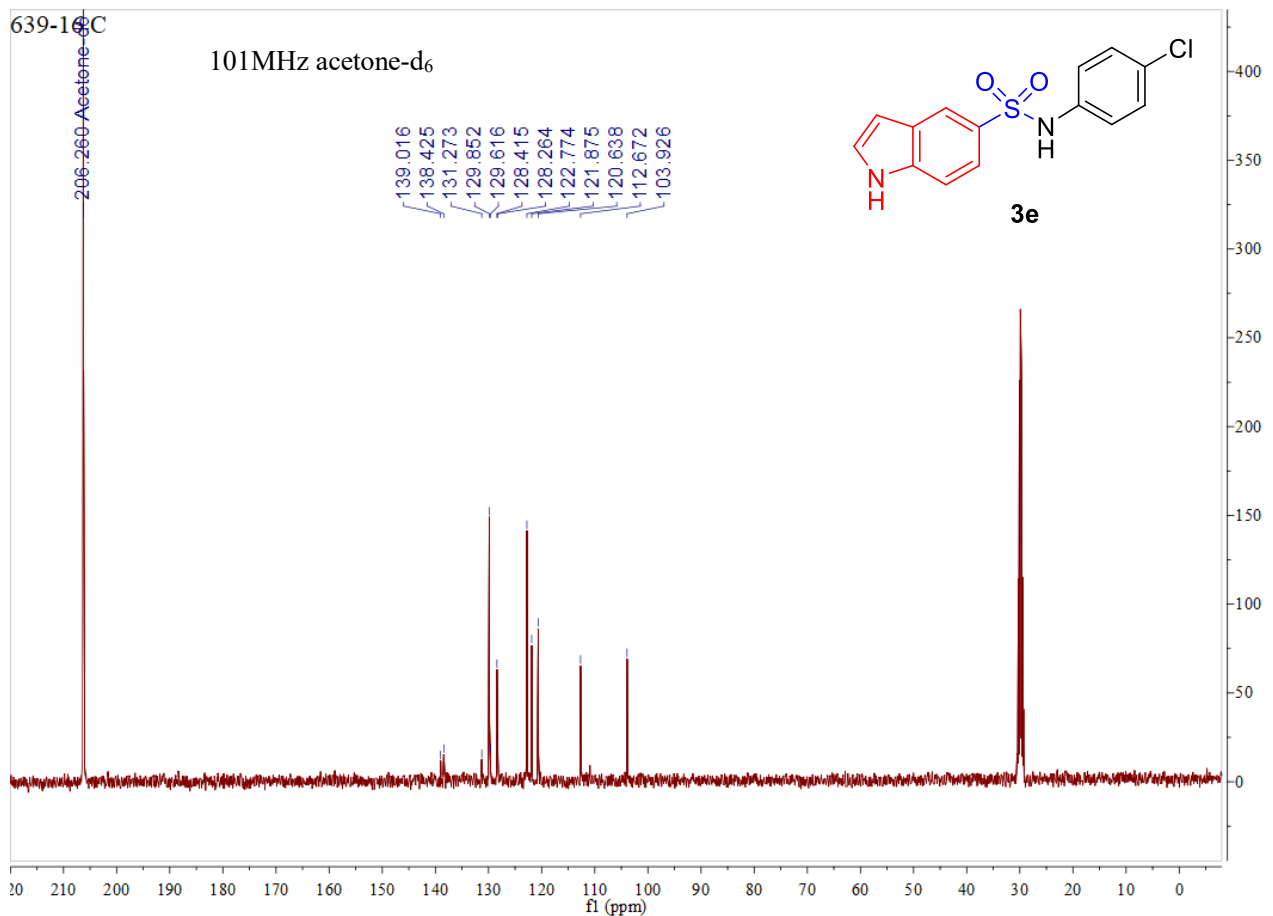

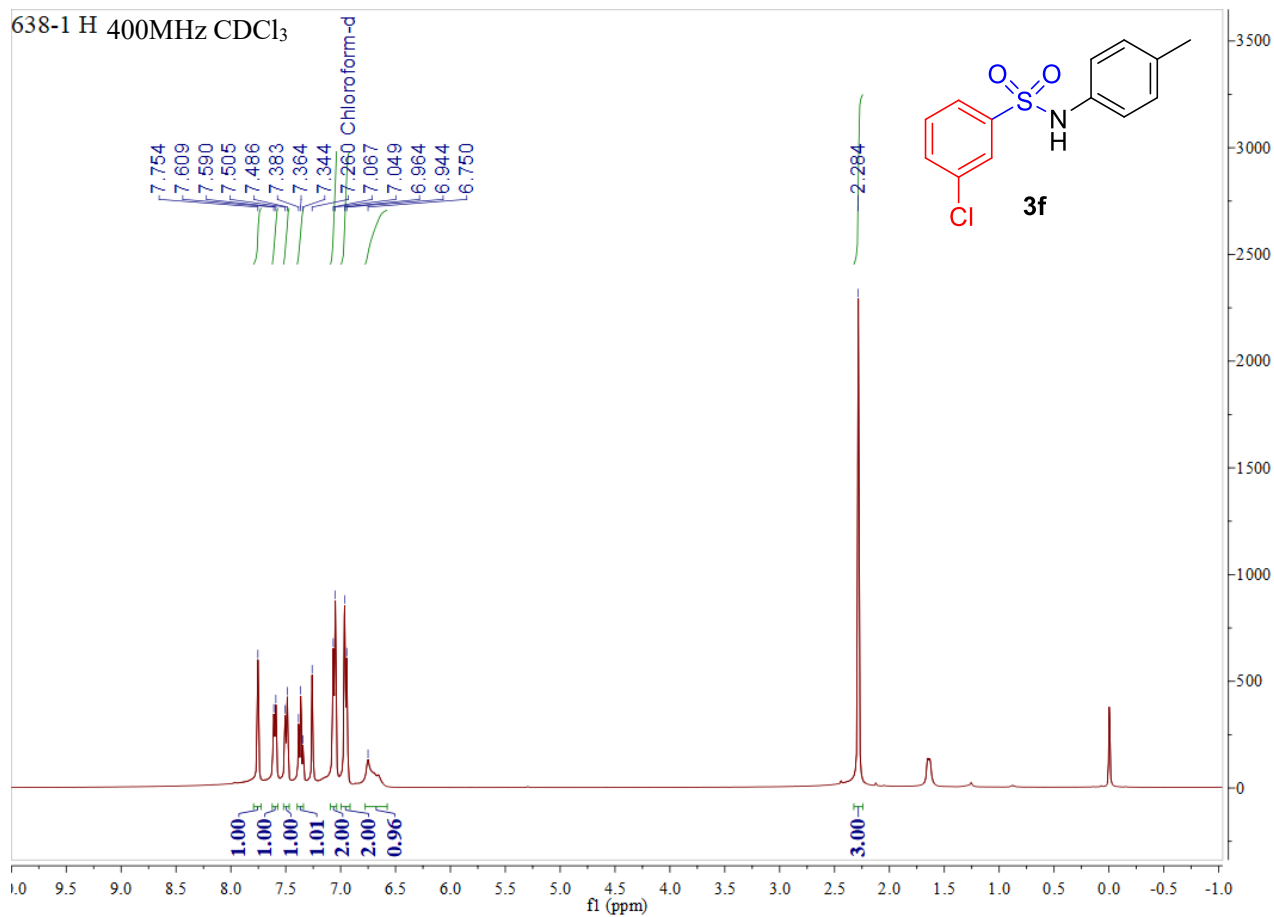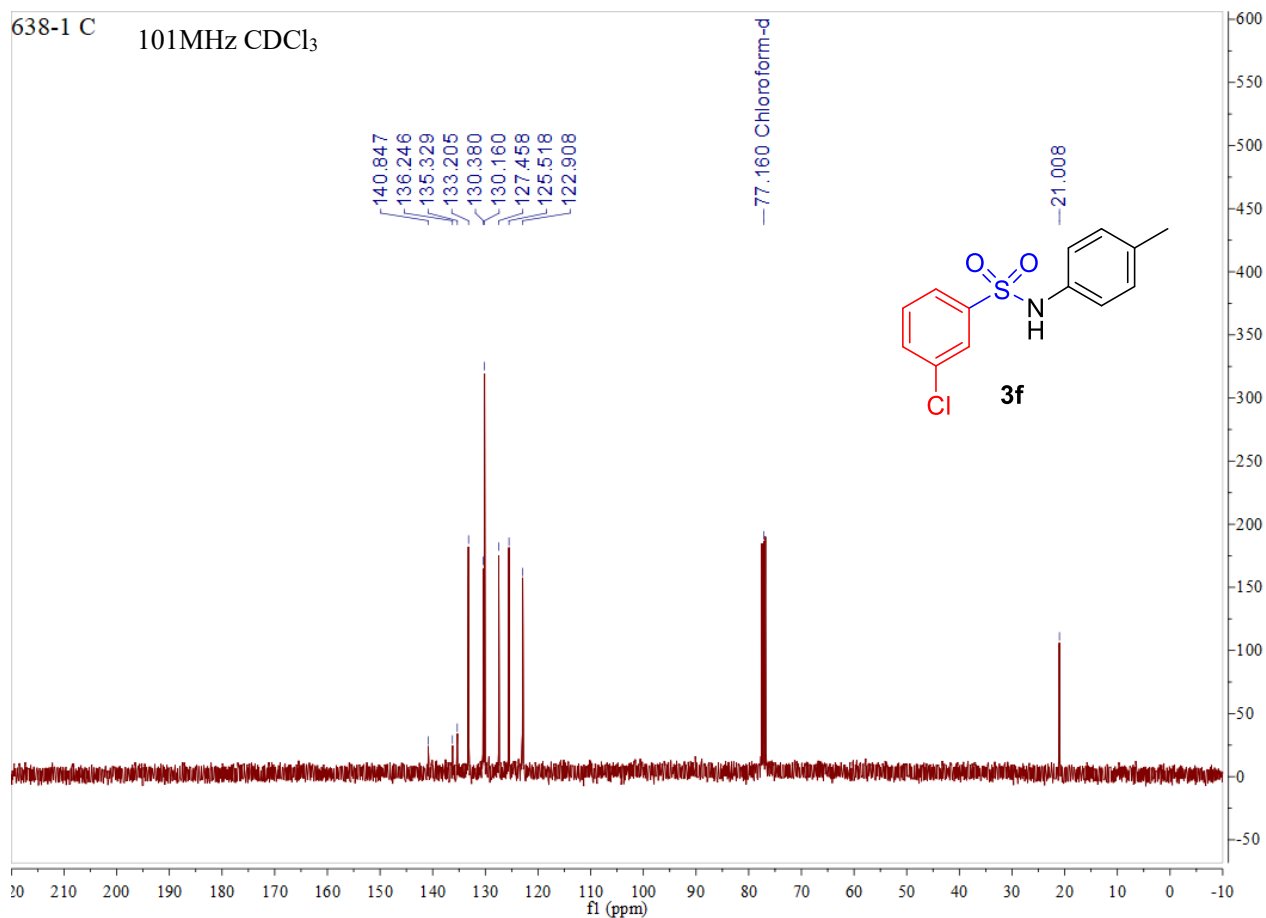

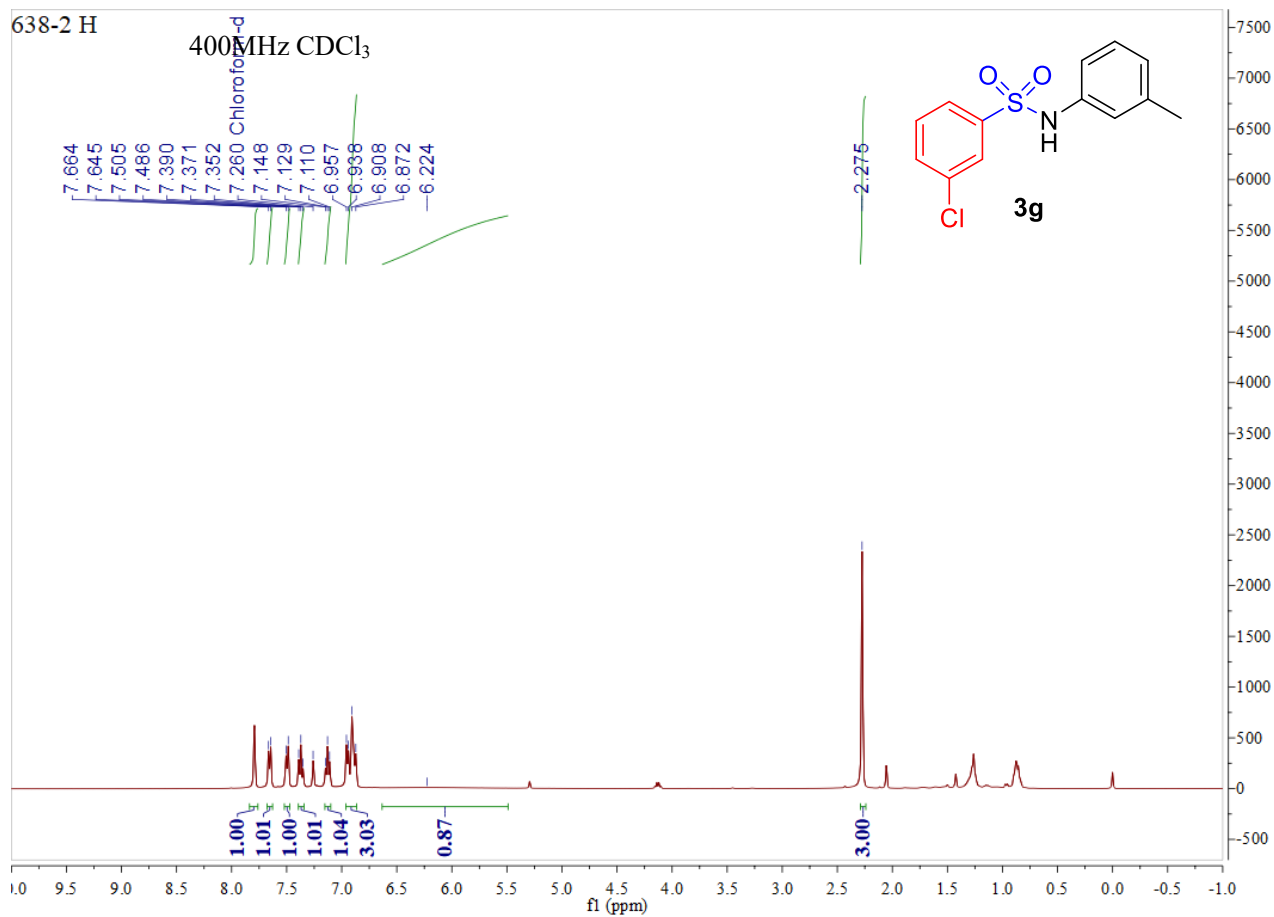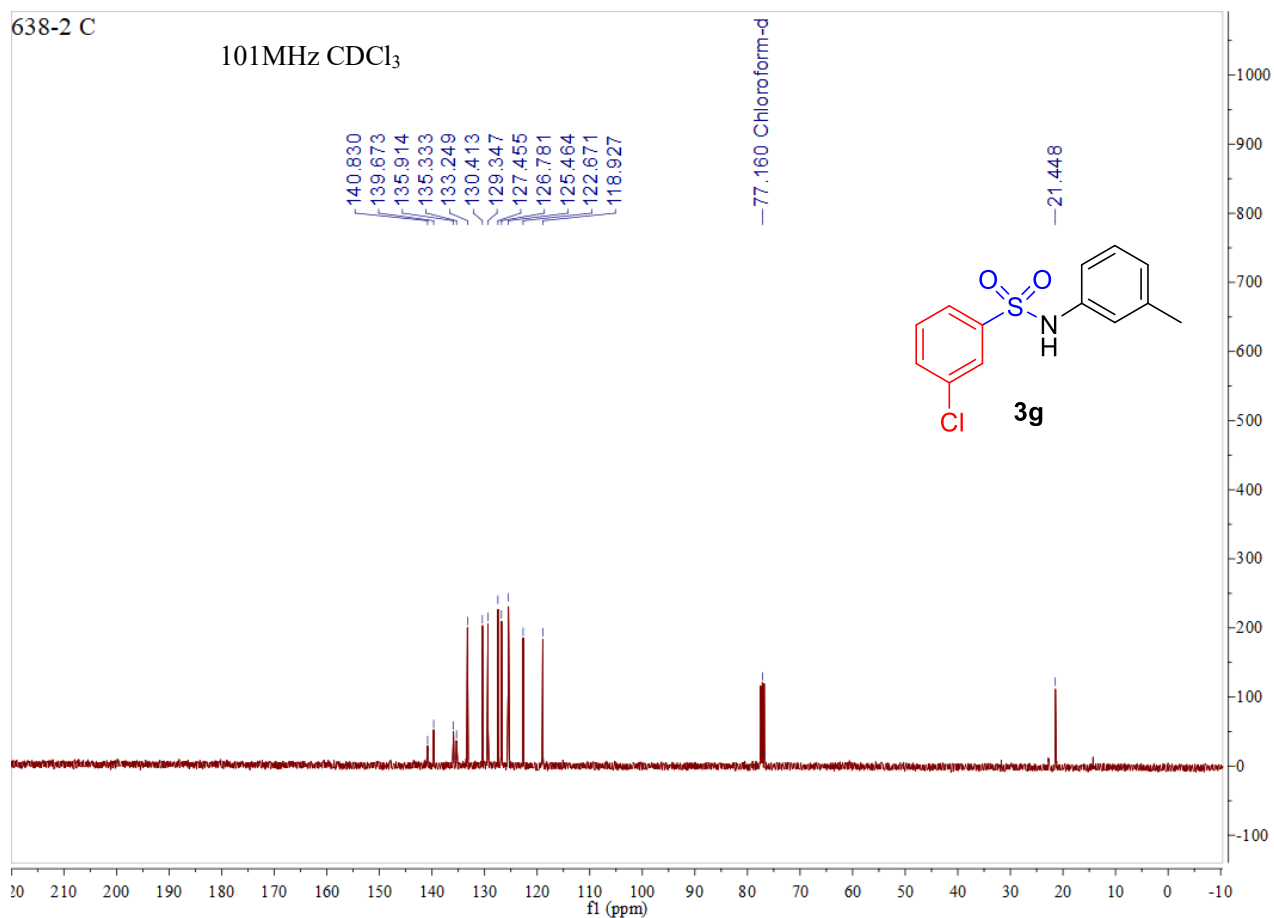

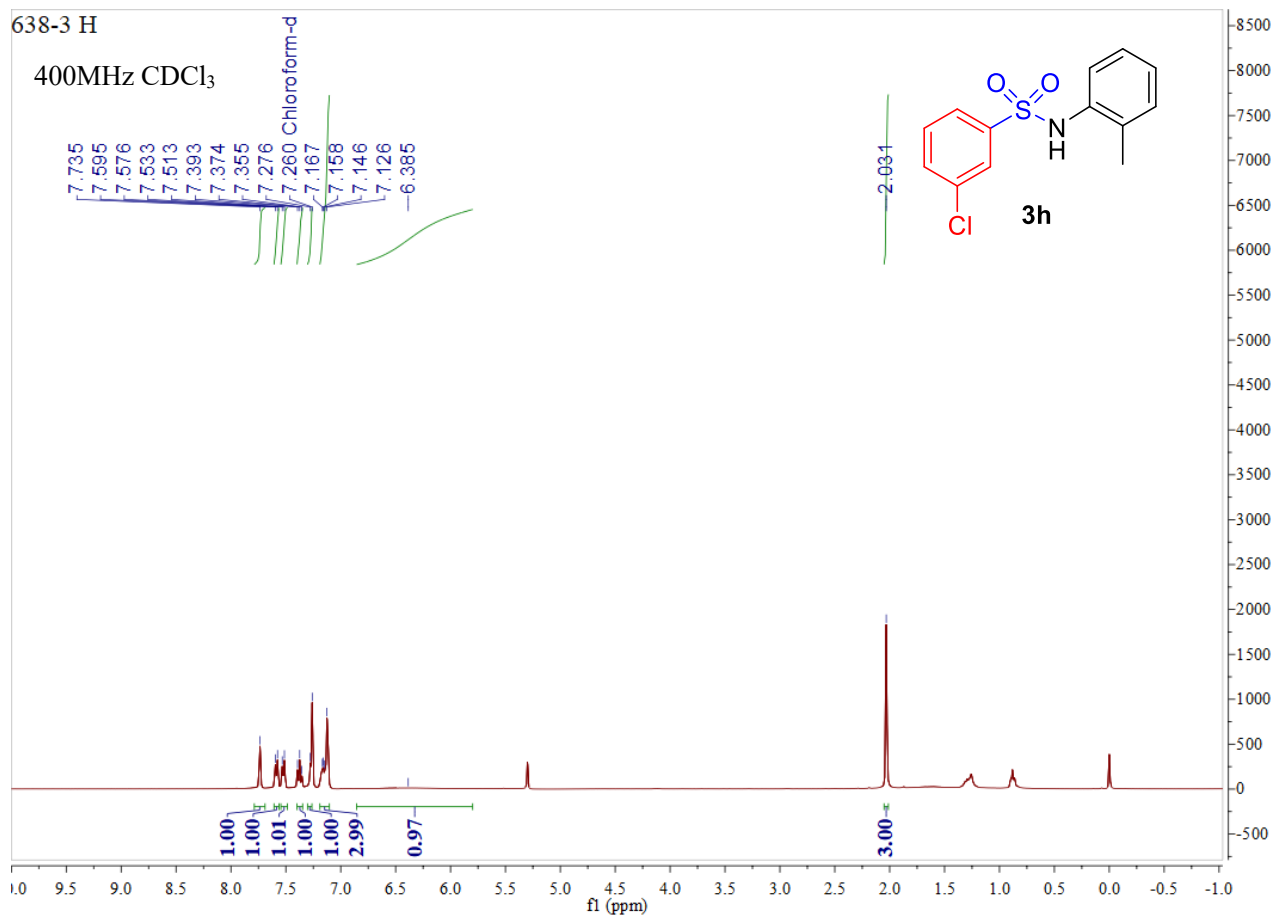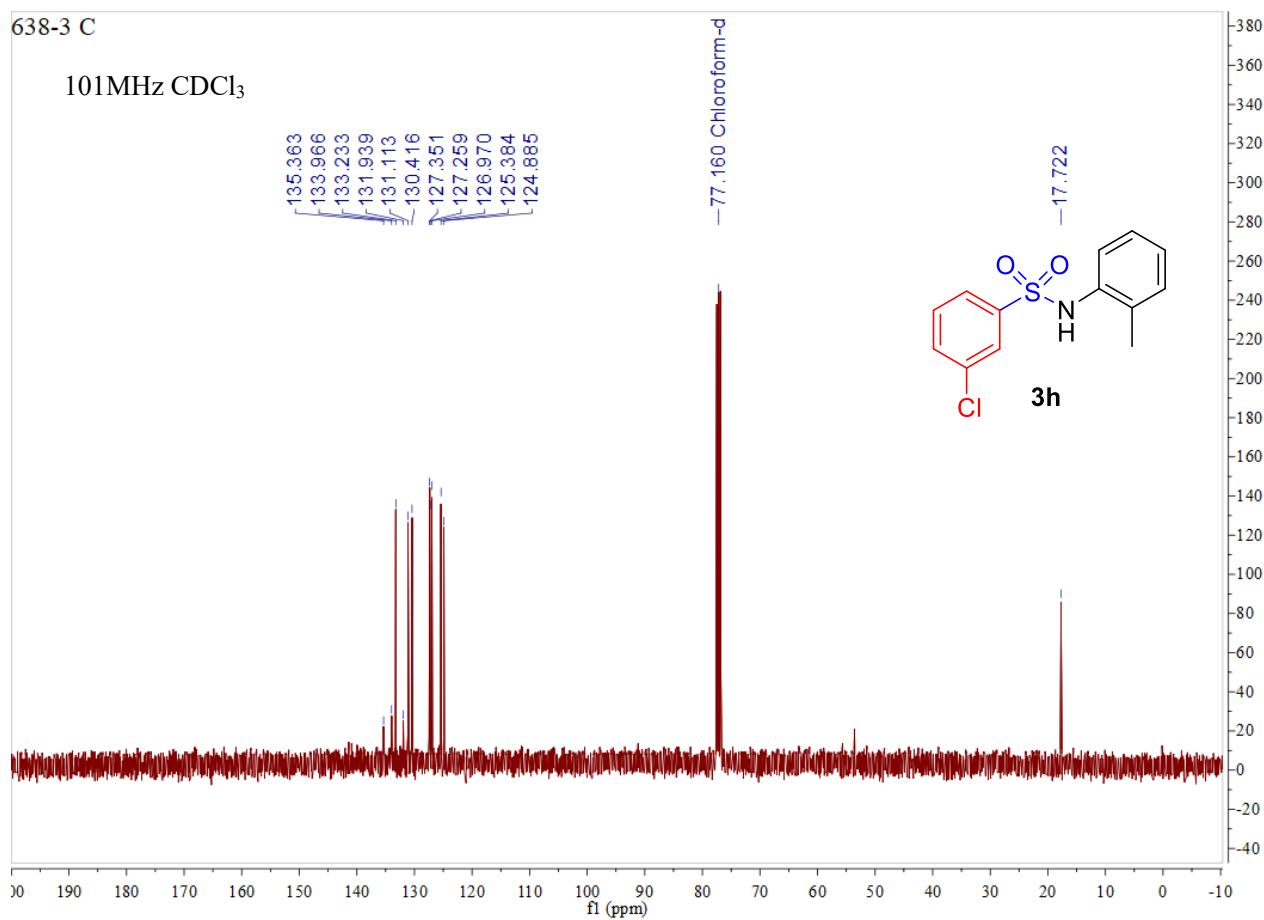

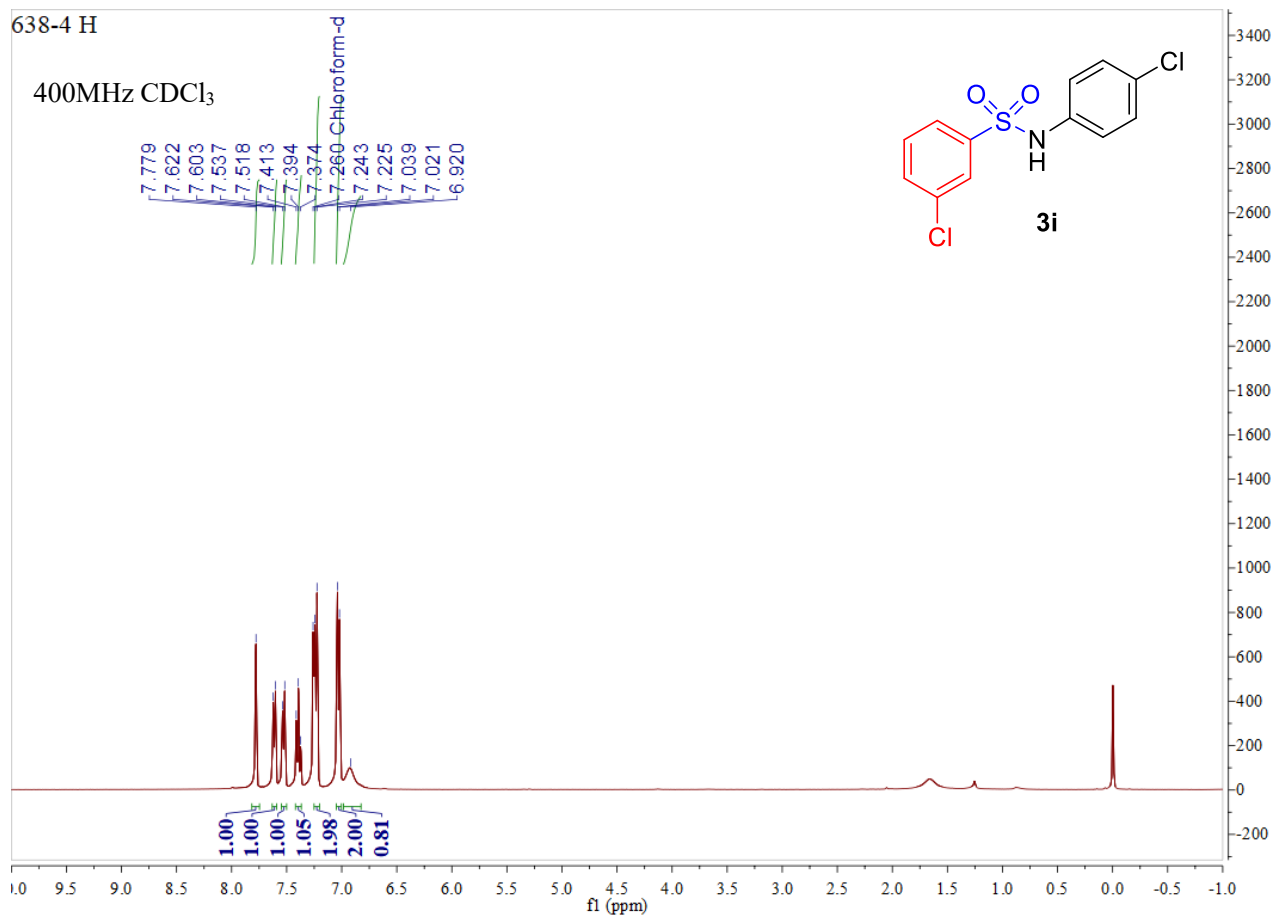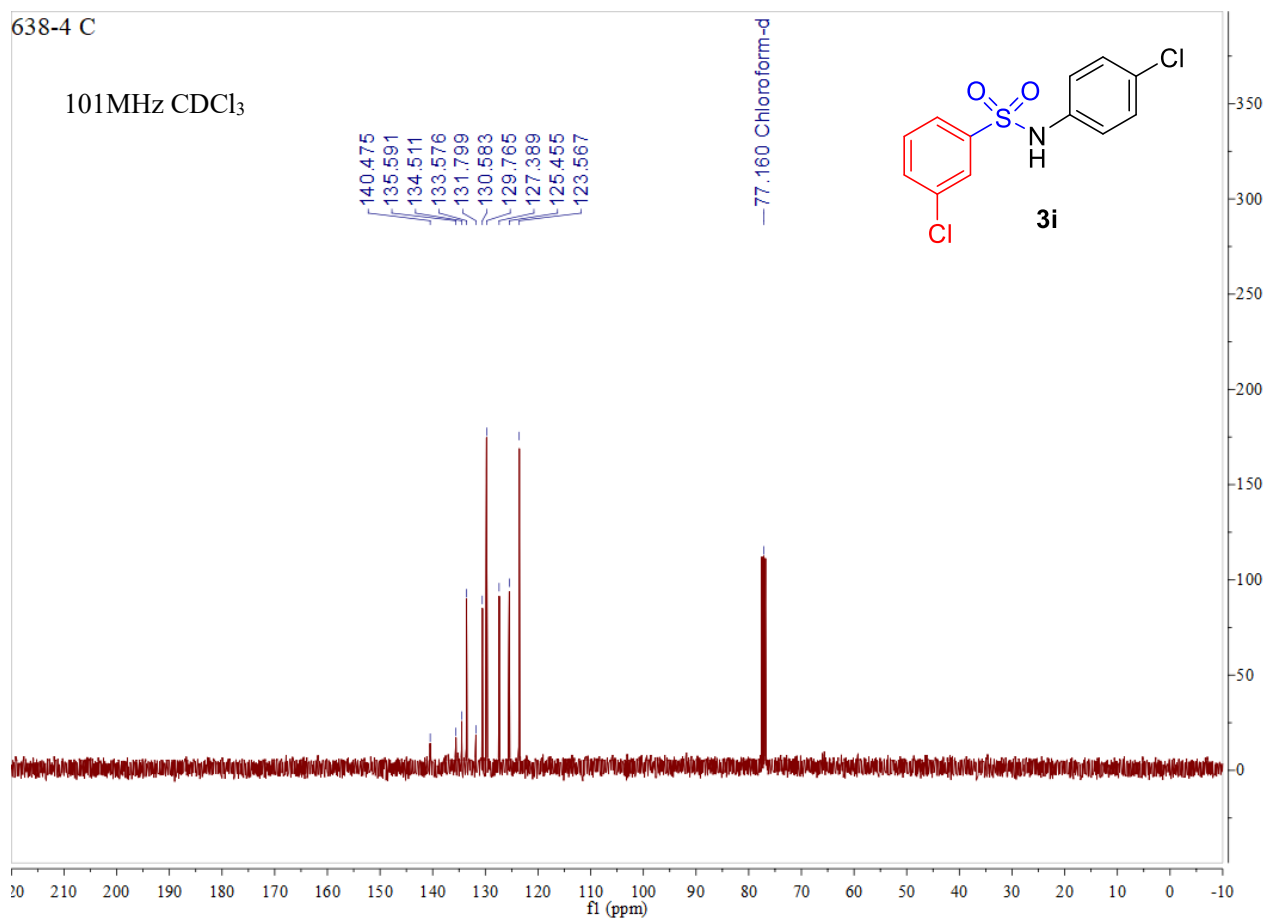

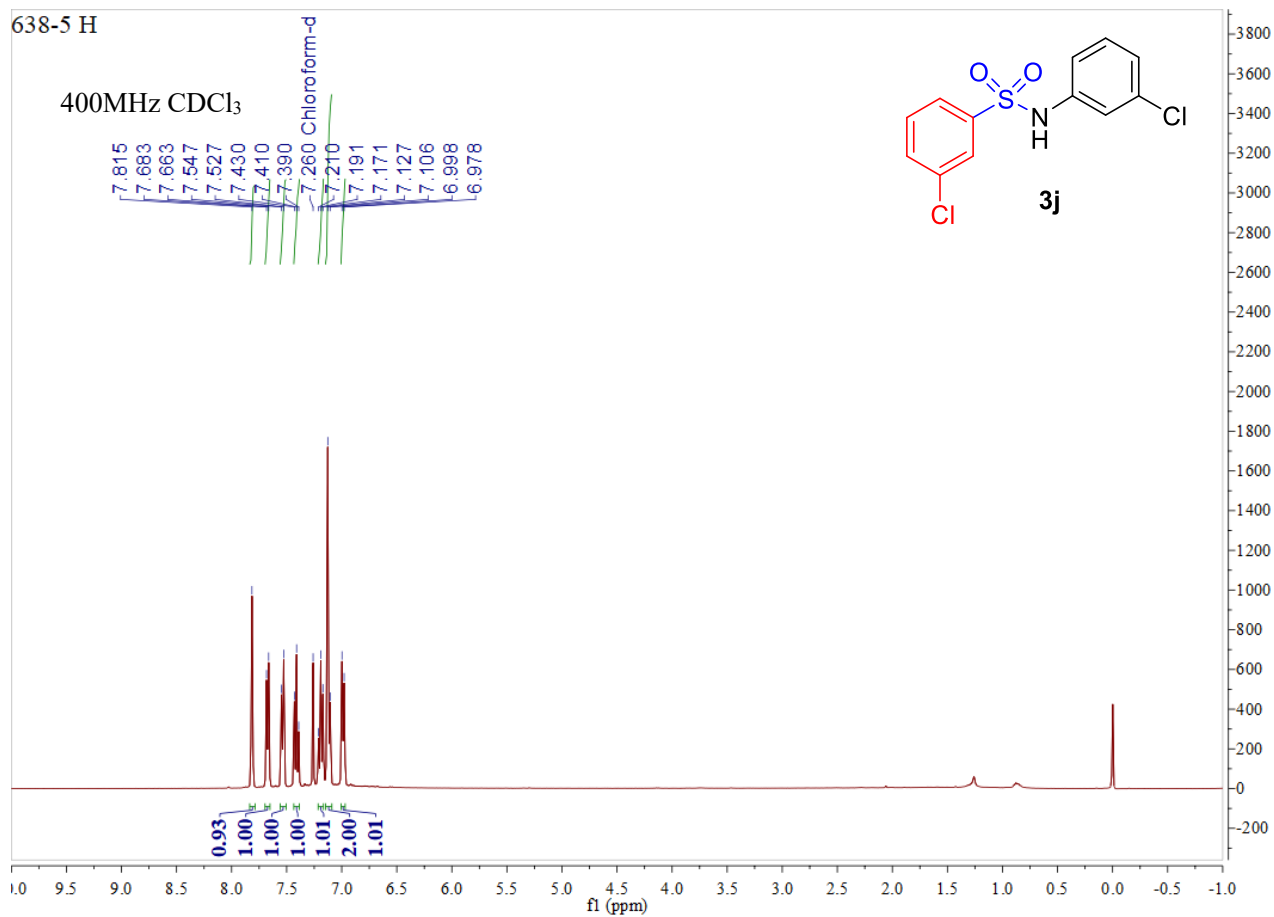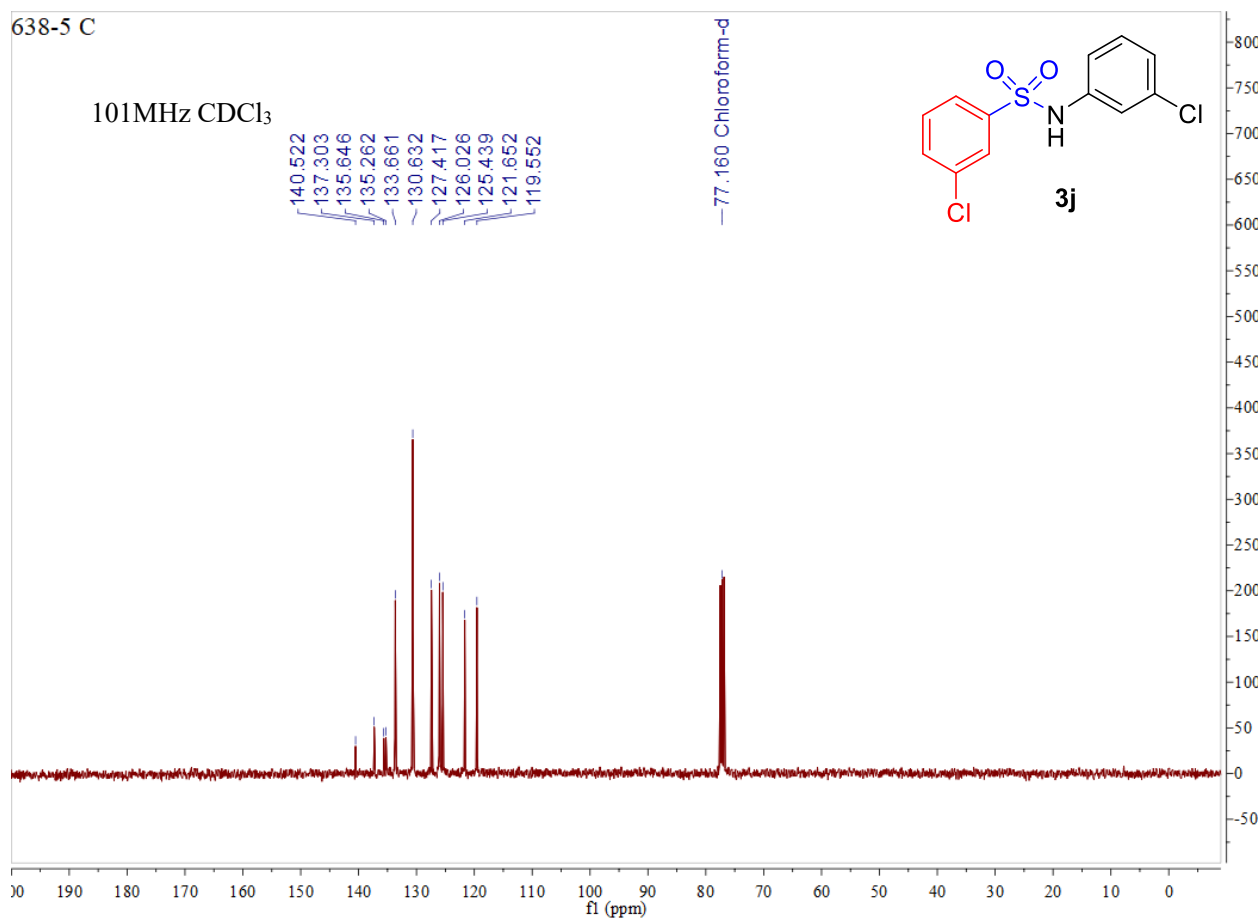

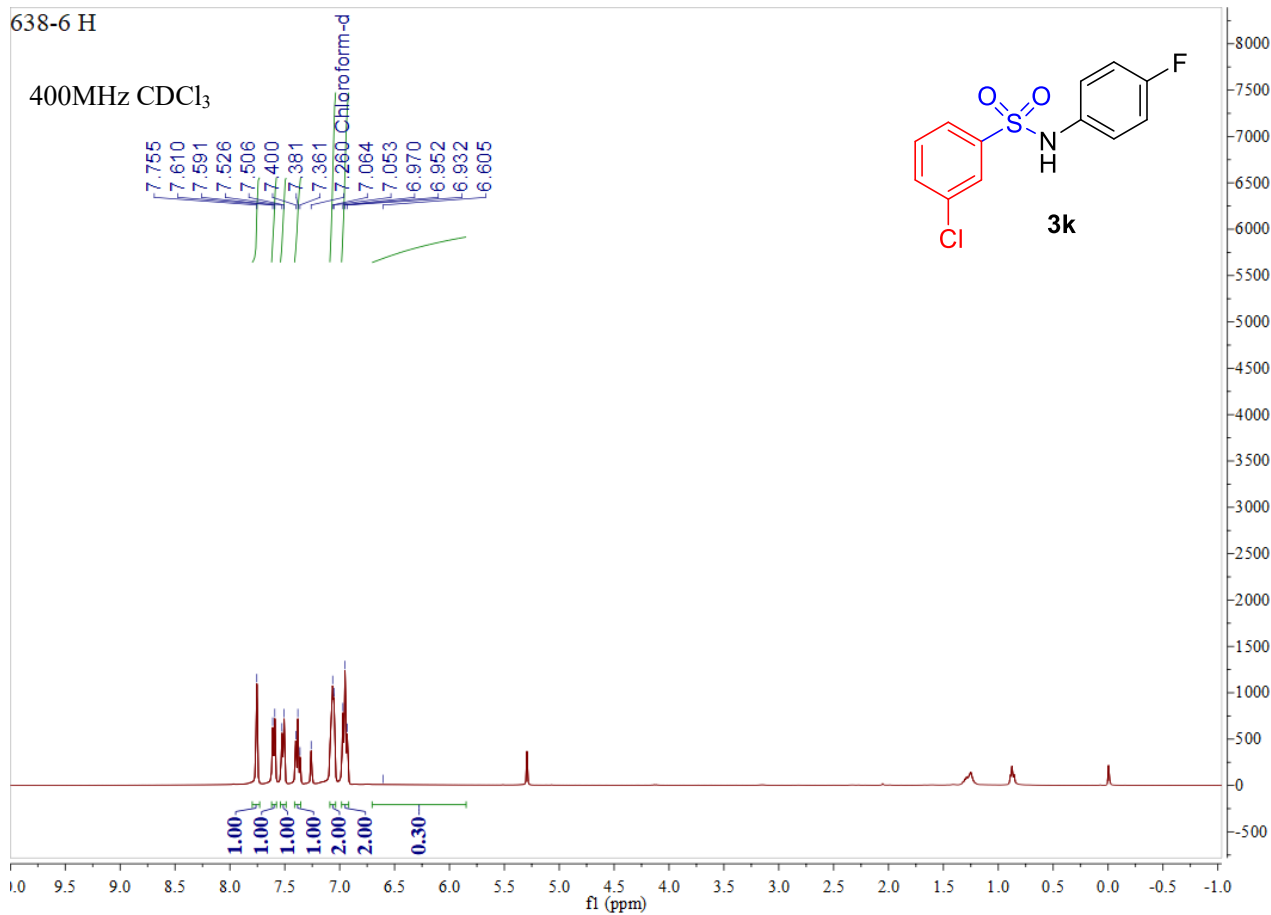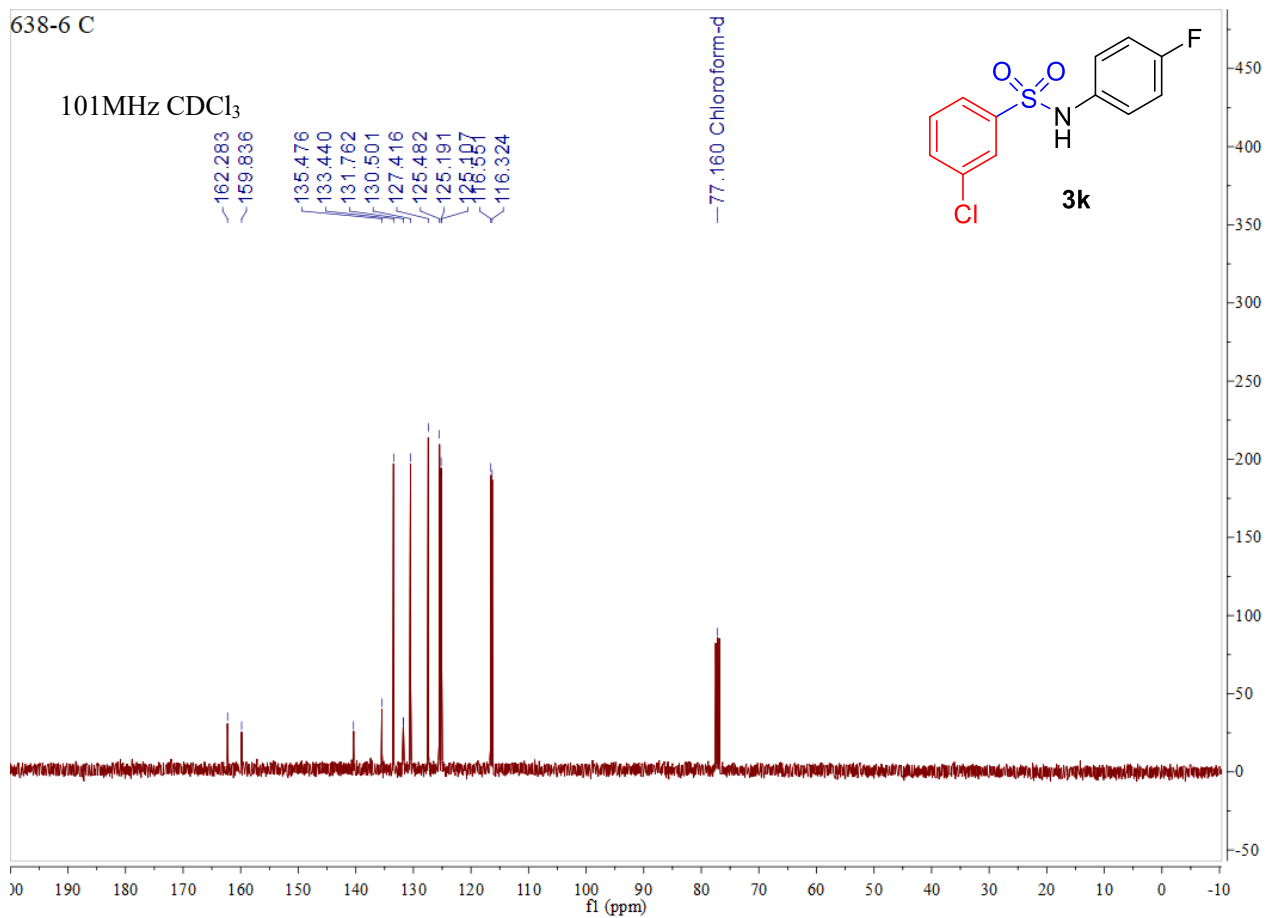

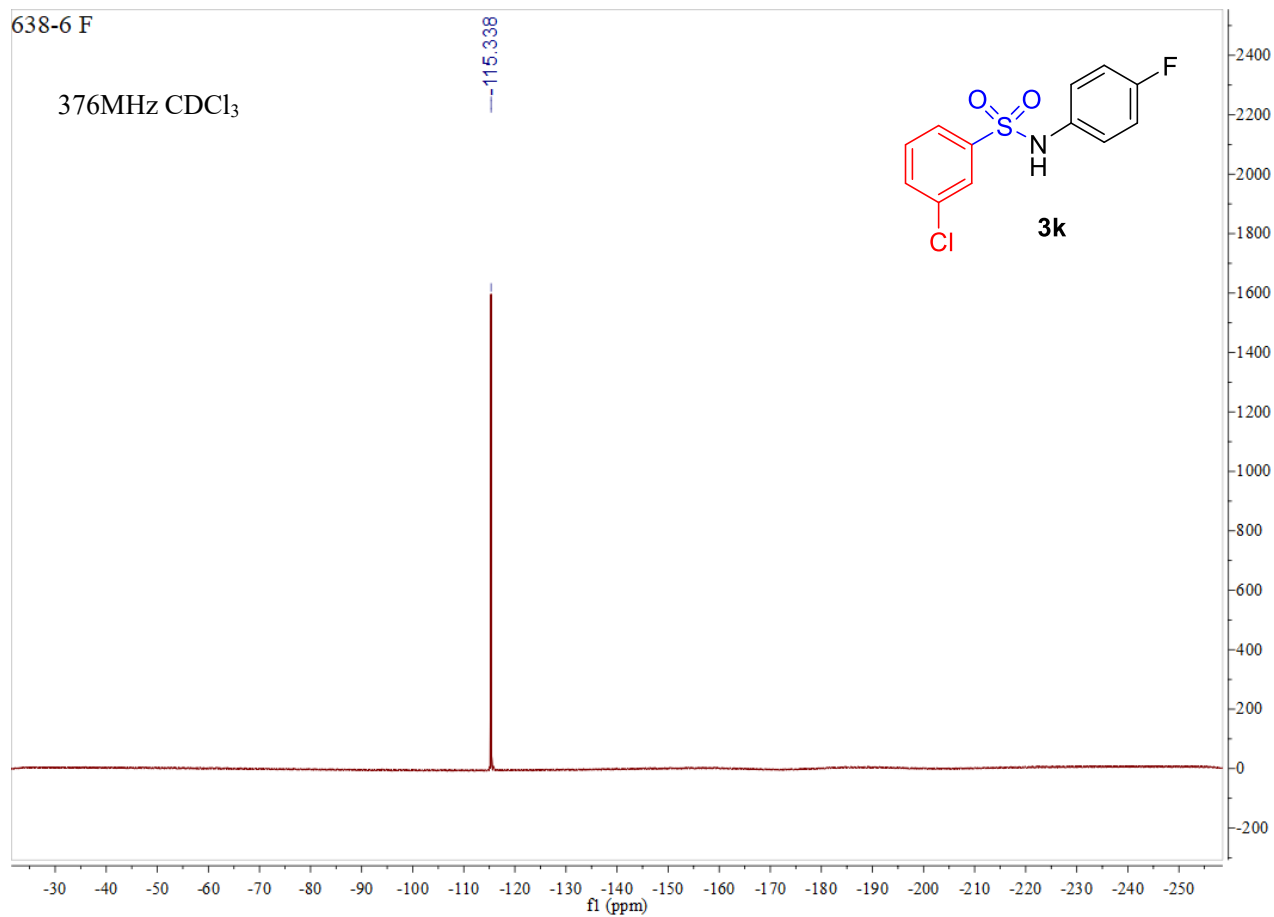



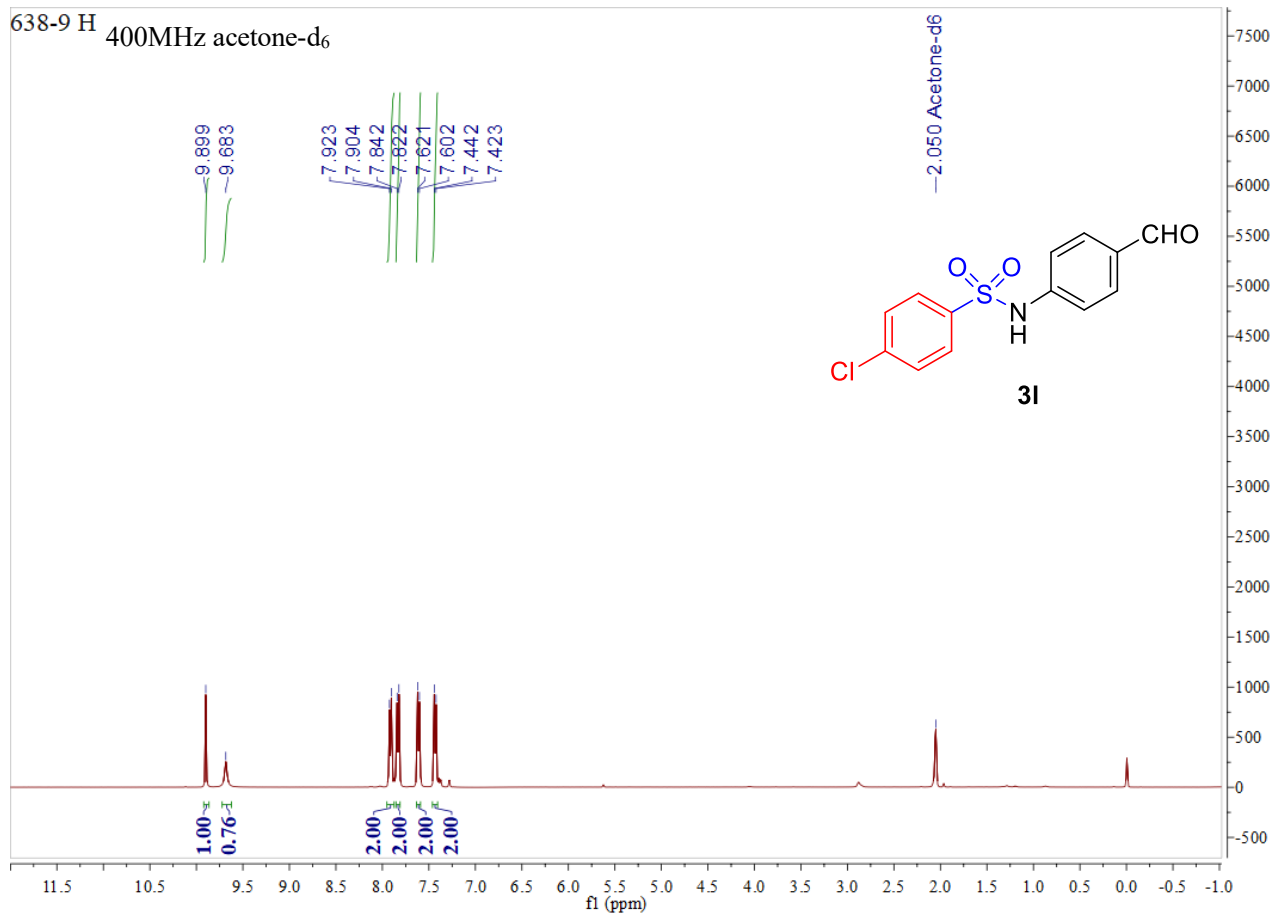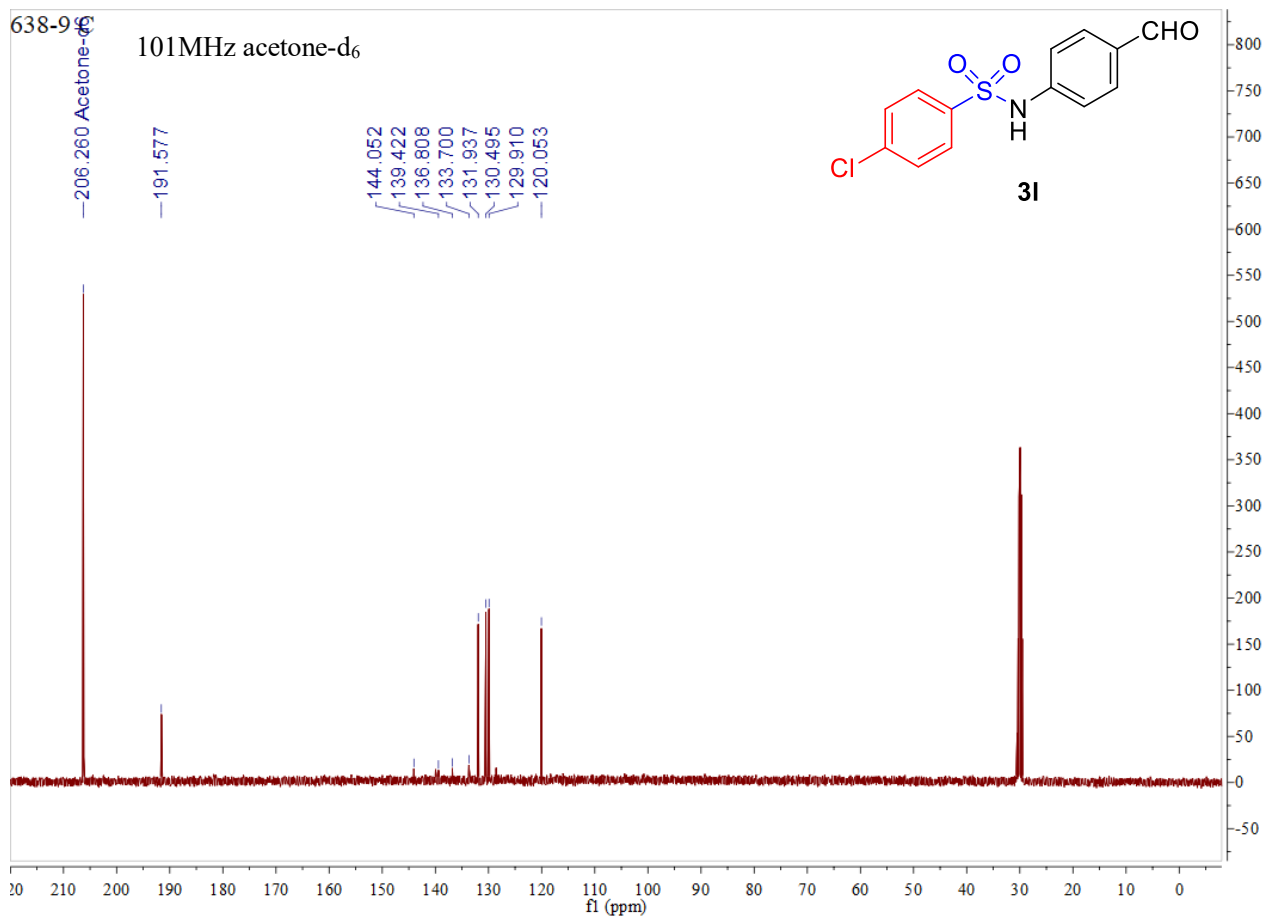

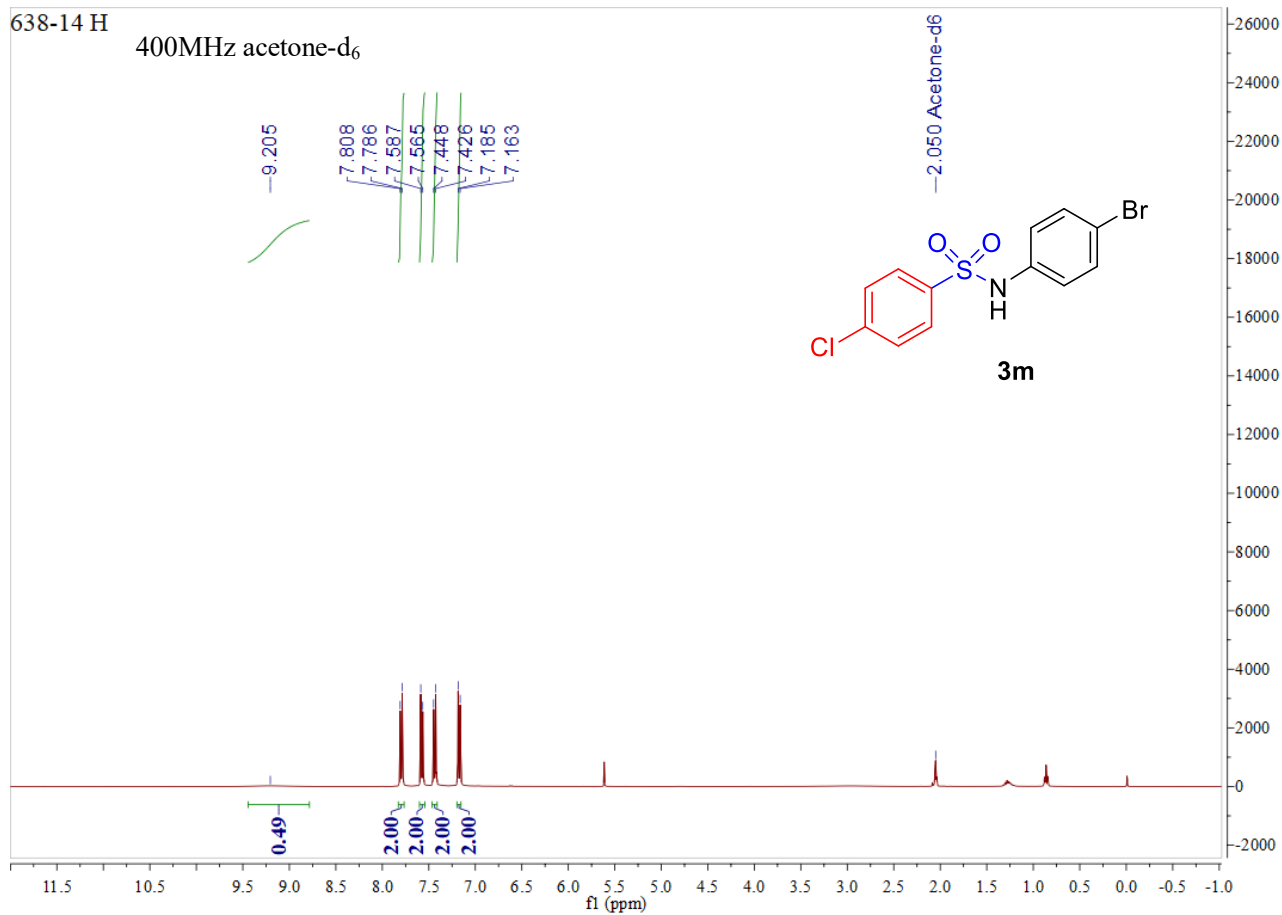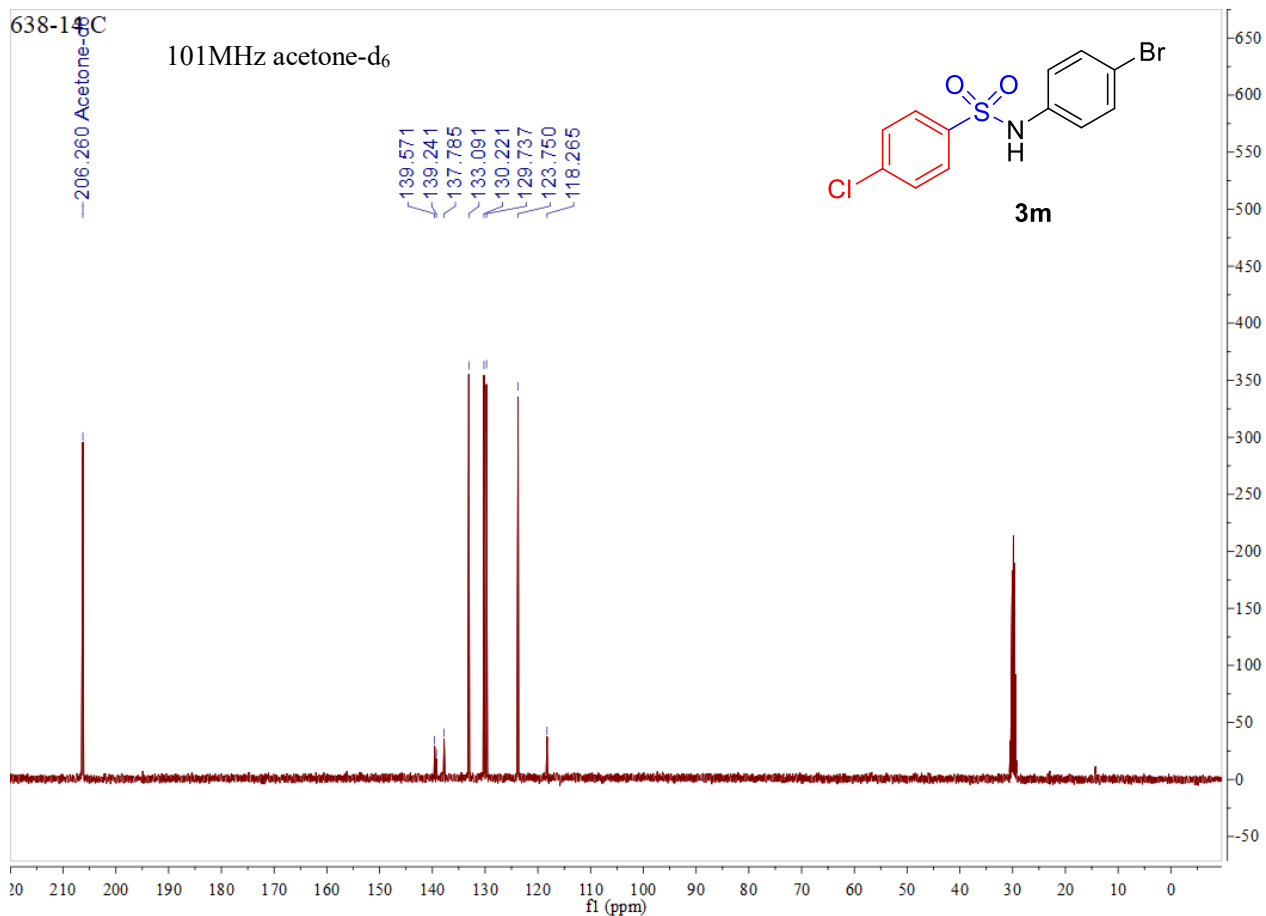

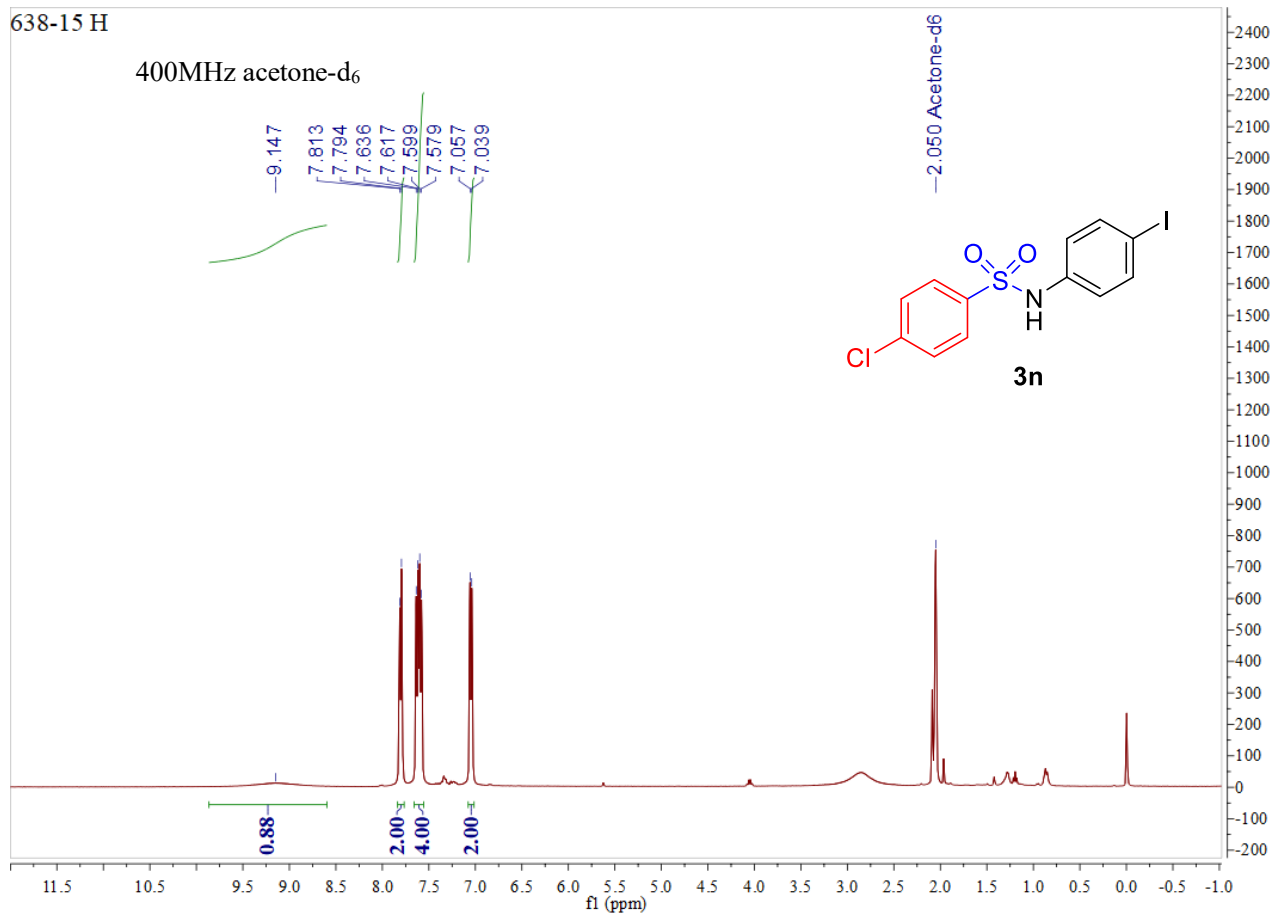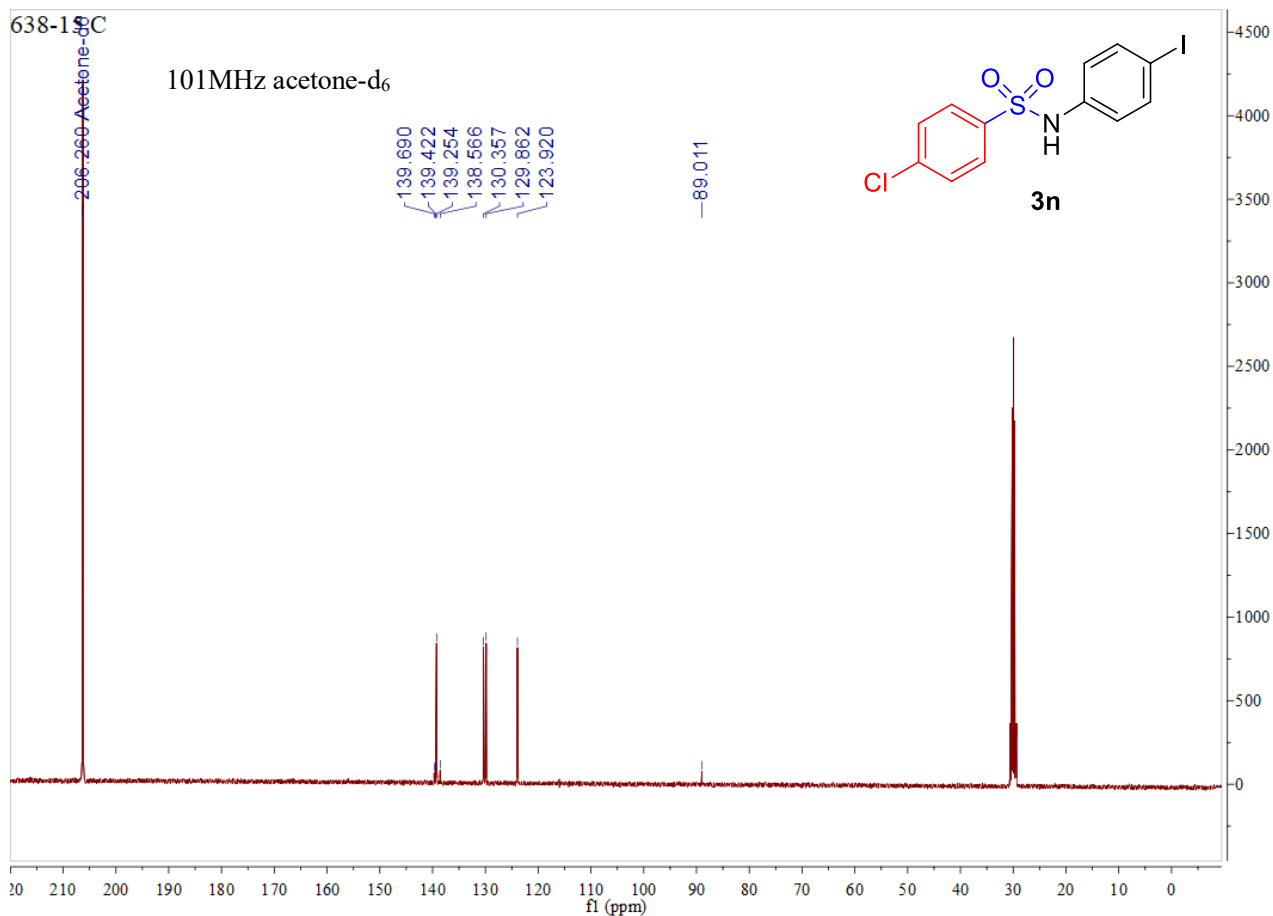

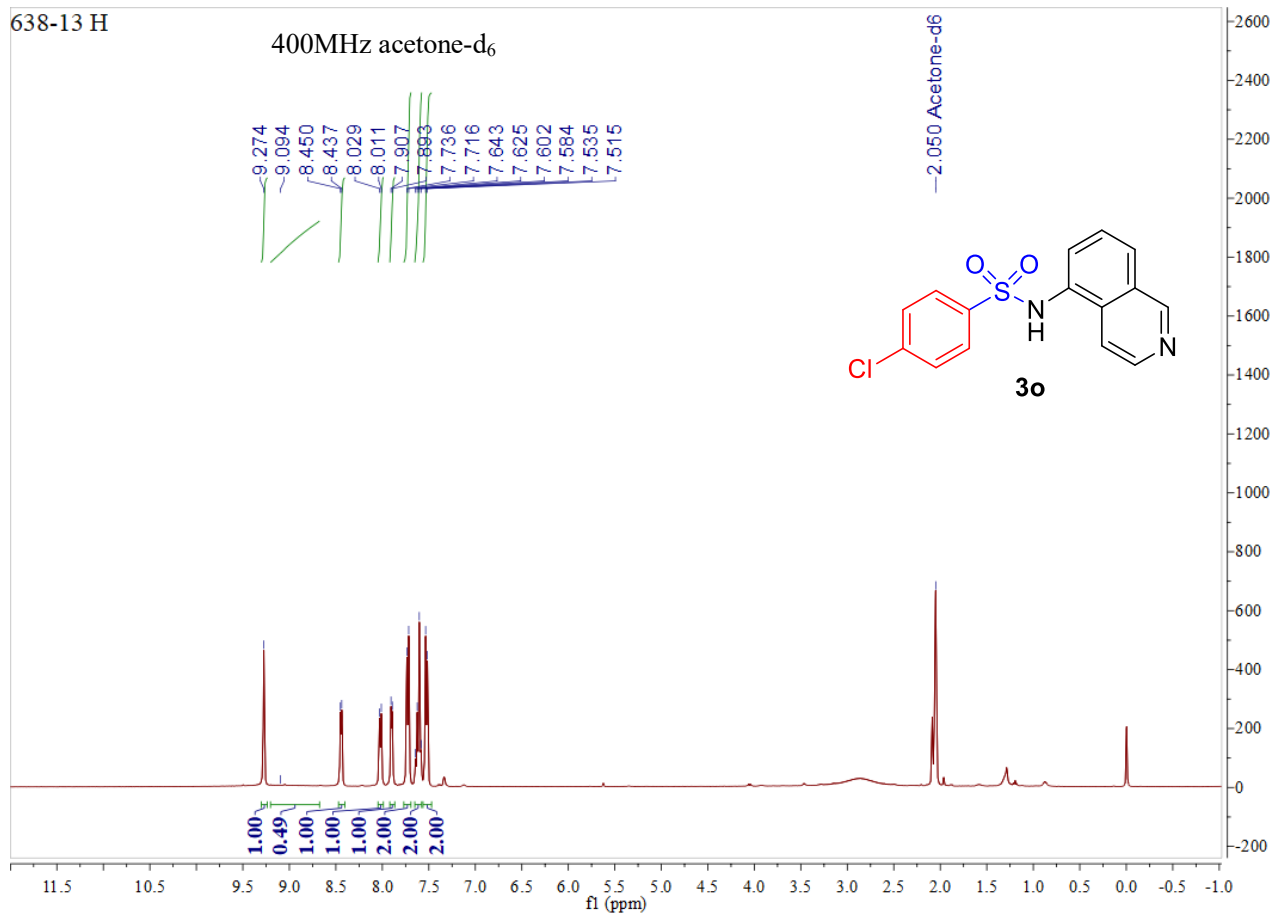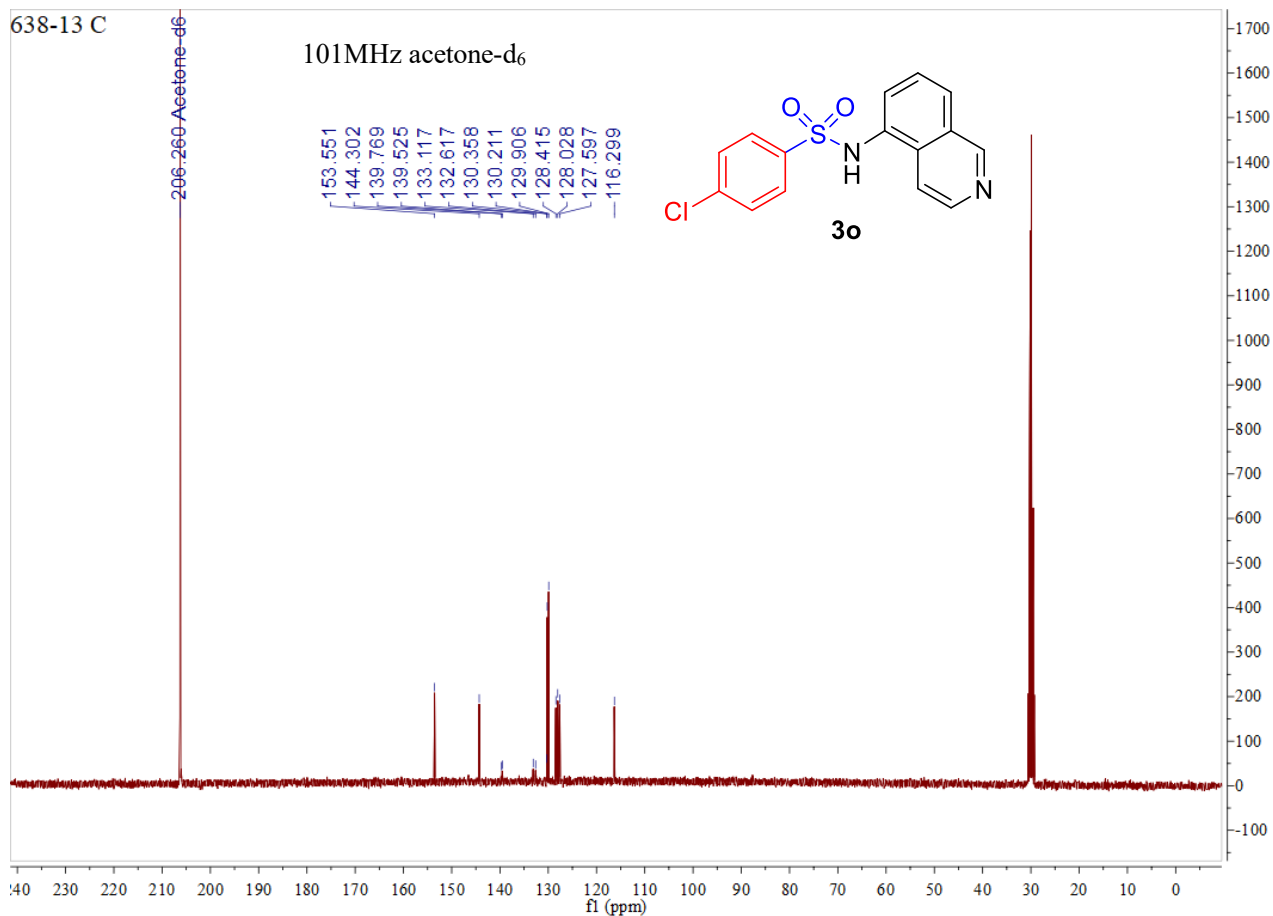

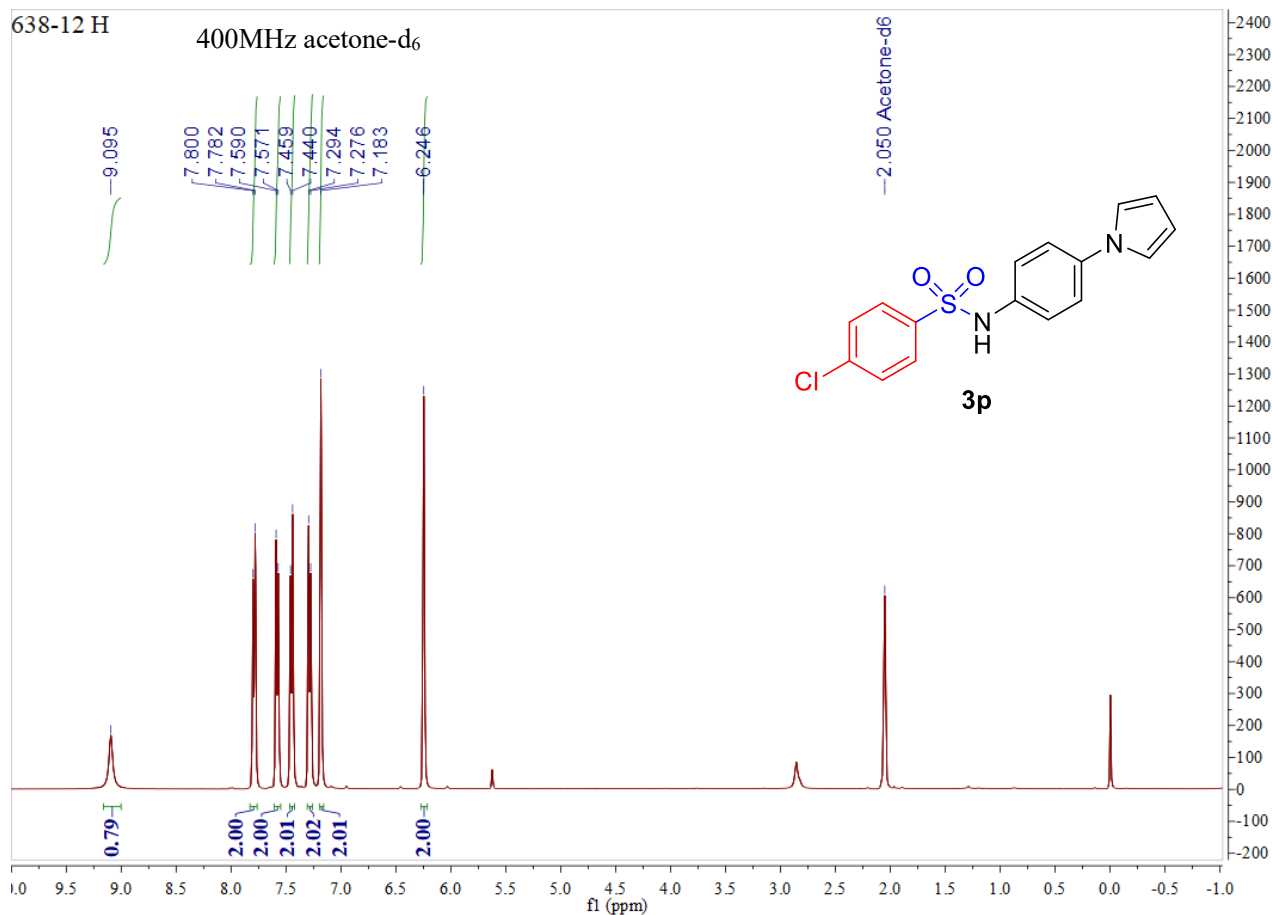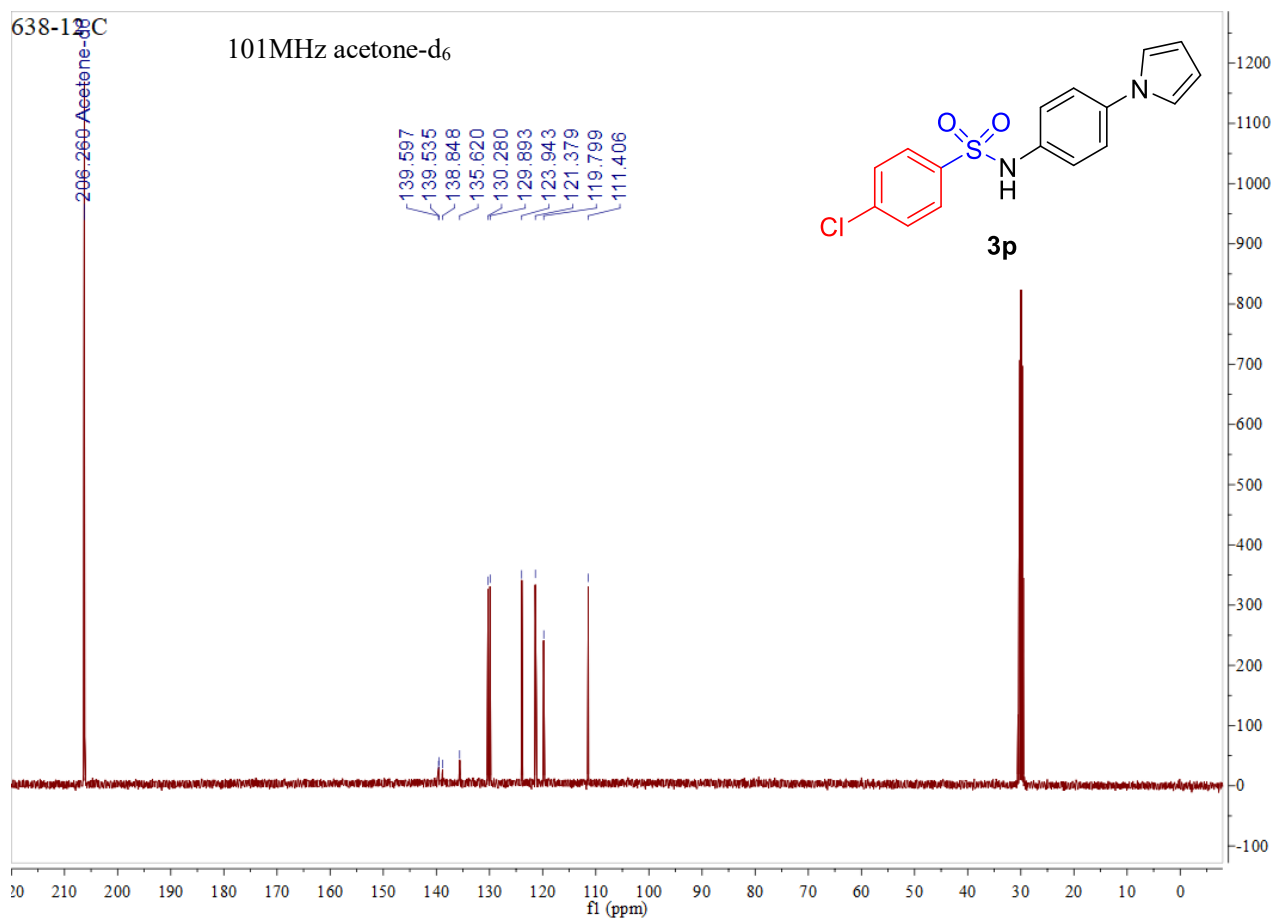

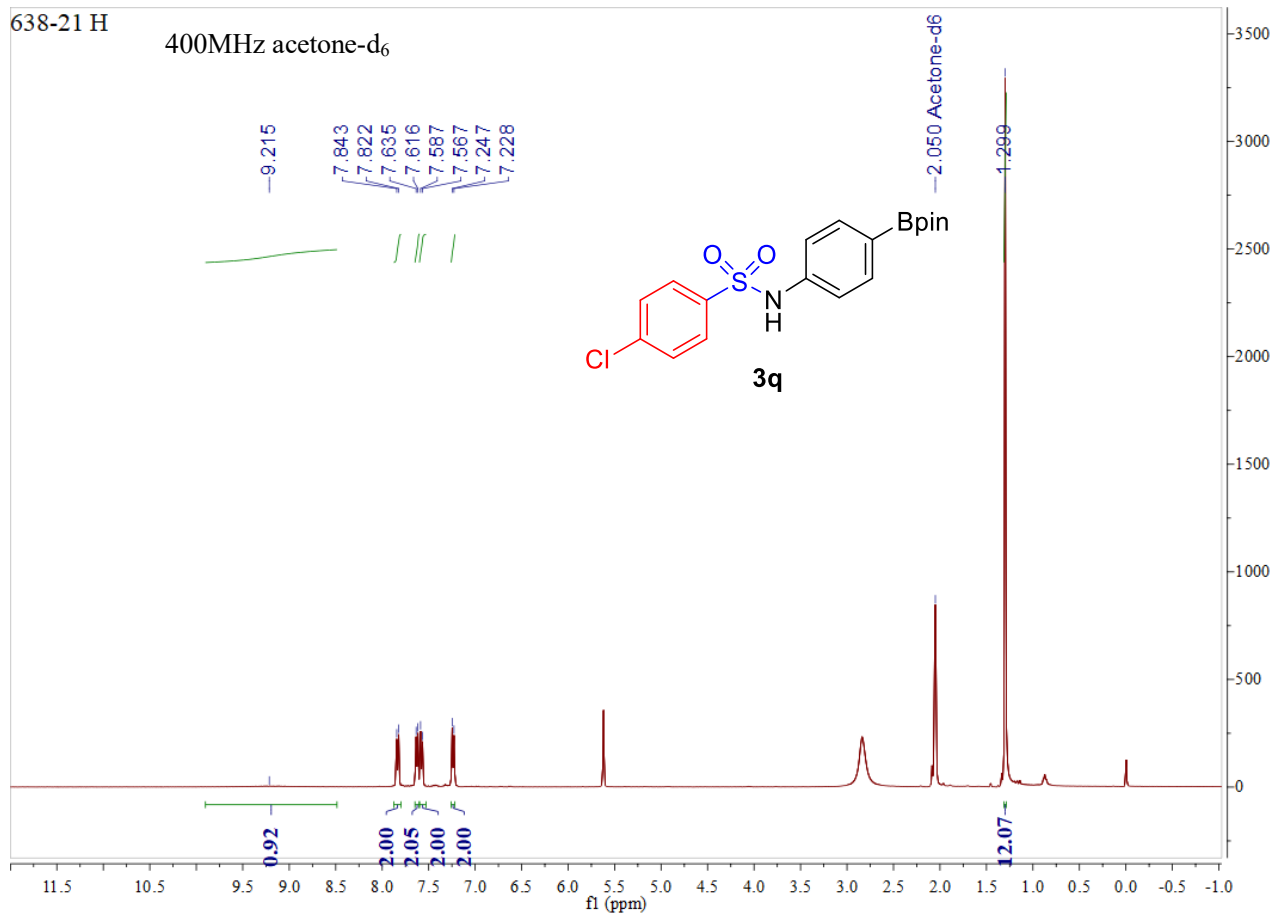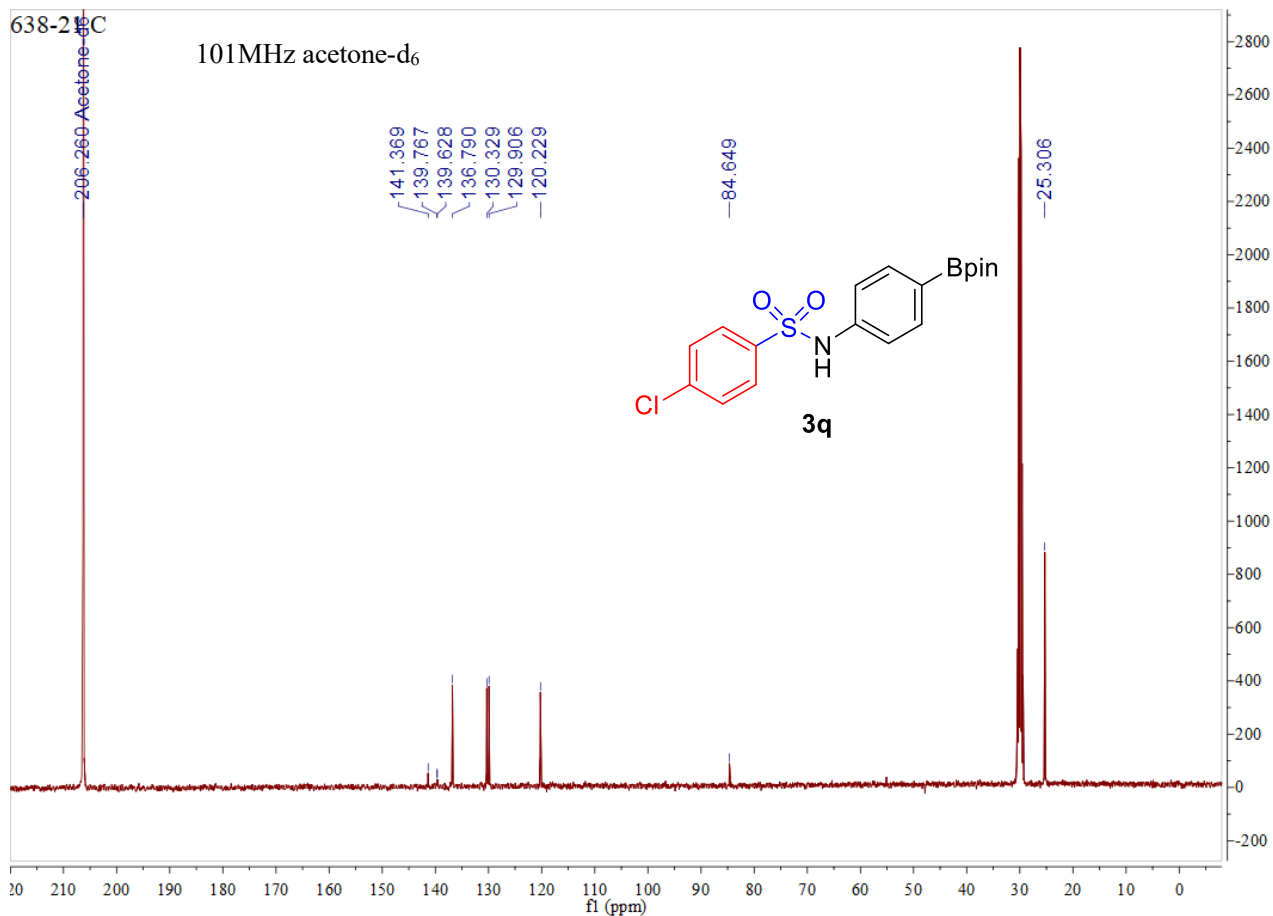

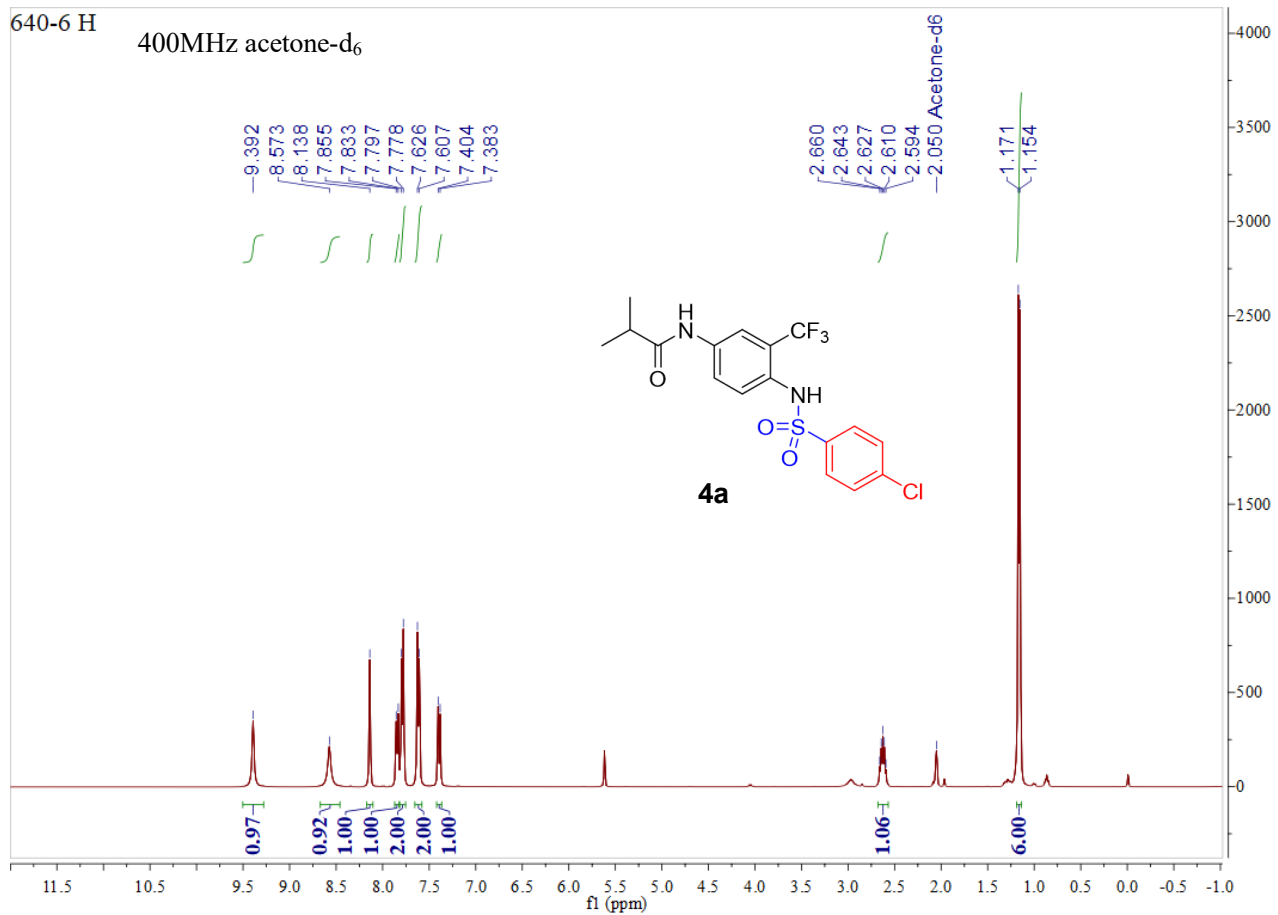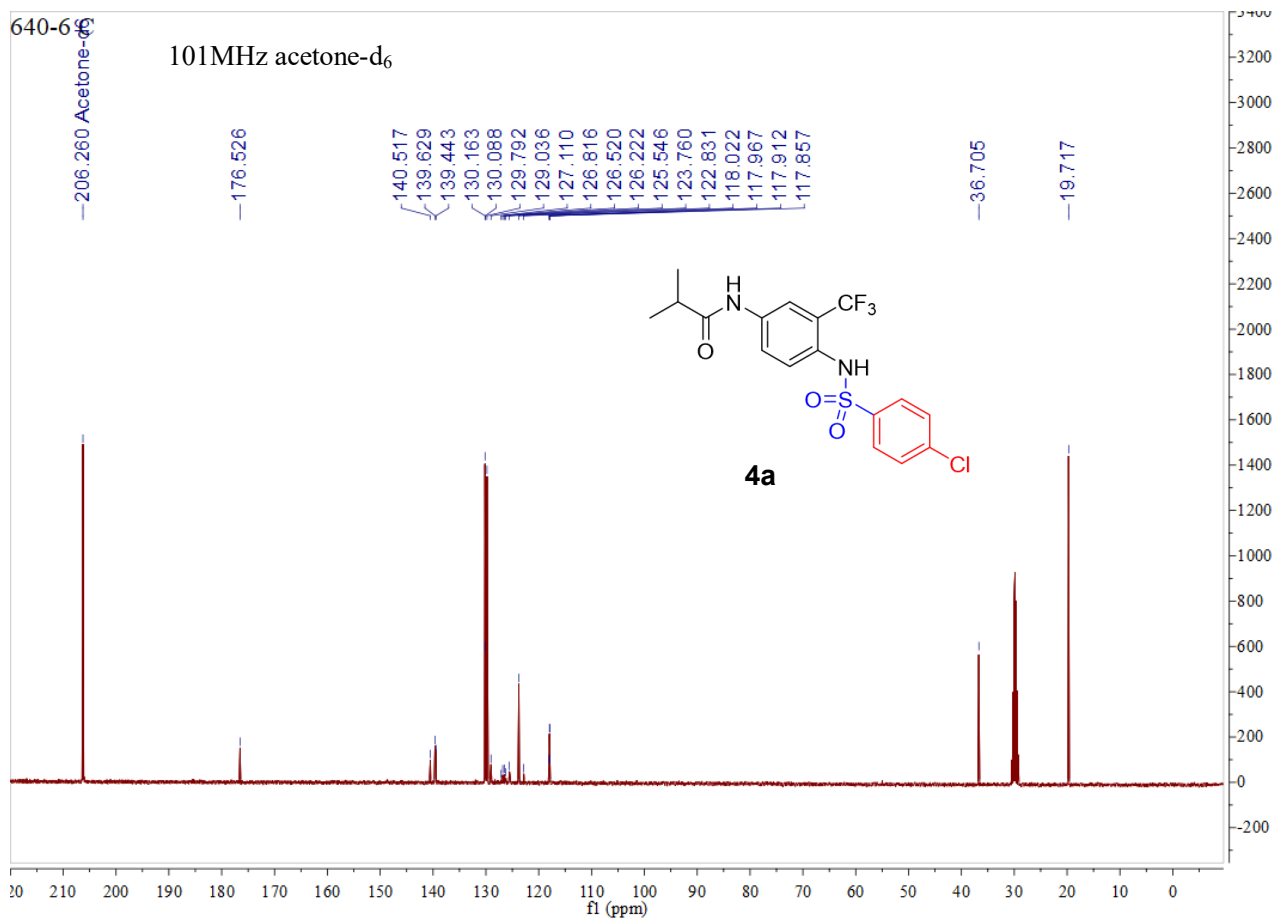

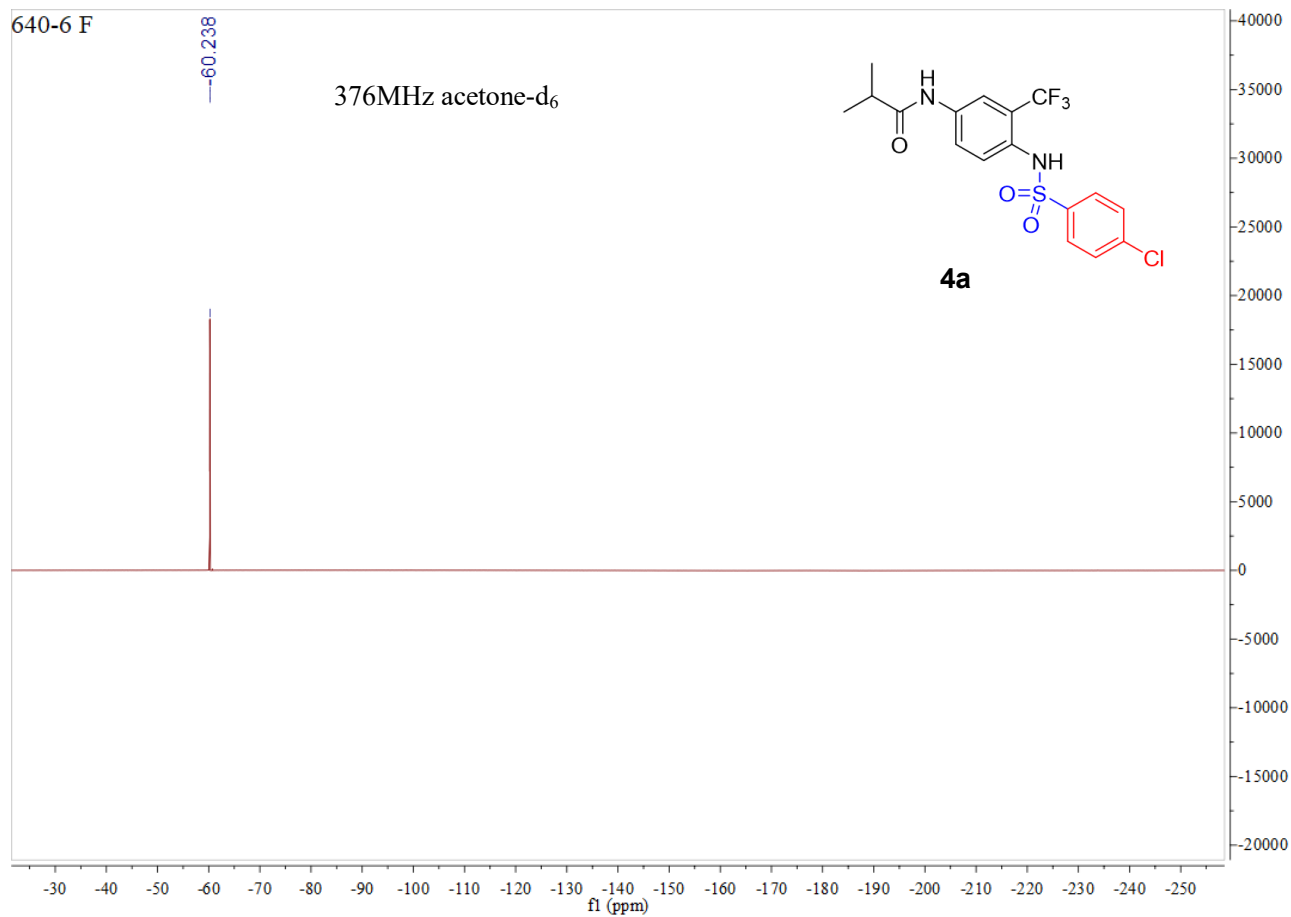

Supplement: d0cc00721h1.pdf [file d0cc00721h1.pdf]
